# Supplementary material
Source: PubMed Central journal article supplement (PMC2664297)
Supplement: NIHMS91076-supplement-1_si_001.pdf [file NIHMS91076-supplement-1_si_001.pdf]

# Continuum of Mechanisms for the Nucleophilic Substitution of Cyclic Acetals

**Jennifer R. Krumper, Walter A. Salamant, and K. A. Woerpel\***

*Department of Chemistry, University of California  
Irvine, CA 92697-2025*

## Supporting Information

### Table of Contents:

|      |                                     |      |
|------|-------------------------------------|------|
| I.   | General Experimental Considerations | S-1  |
| II.  | Substrate Preparation               | S-2  |
| III. | Nucleophilic Substitution           | S-4  |
| IV.  | Stereochemical Proofs               | S-16 |
| V.   | Competition Experiments             | S-22 |
| VI.  | Bibliography                        | S-23 |
| VII. | Analytical Data                     | S-24 |

### I. General Experimental Considerations

$^1\text{H}$  NMR and  $^{13}\text{C}$  NMR spectra were recorded at ambient temperature at 400 or 500 MHz and 100 or 125 MHz, respectively, using a Bruker DRX 400 or DRX 500 spectrometer. Chemical shift data are reported in ppm downfield from tetramethylsilane and are referenced to the proton or carbon peaks for this standard. NMR resonance multiplicities are reported with the following abbreviations: br = broad, s = singlet, d = doublet, t = triplet, q = quartet, and m = multiplet, and coupling constants are reported in Hz. Infrared (IR) spectra were obtained using a MIDAC Prospect FT-IR spectrometer, a Perkin-Elmer Paragon 1000PC FT-IR, or a React-IR AS-1000 spectrometer. High resolution mass spectra were acquired on a VG Analytical 7070E, Fisons Autospec, or Waters LCT Premier spectrometer, and were obtained by peak matching. Microanalyses were performed by Atlantic Microlab Inc, Norcross, GA. Analytical gas-liquid

chromatography (GC) analyses were performed on an Agilent 6850 series chromatograph, equipped with an Agilent 6850 auto-sampler and a flame-ionization detector. A fused silica capillary column (30 m x 0.32 mm x 0.25  $\mu$ m) wall-coated with DB-1 (J & W Scientific) was used with helium as the carrier gas (25 psi column head pressure). Method of chromatography is as follows: Start temperature = 50  $^{\circ}$ C; ramp = 10  $^{\circ}$ C/min; final temperature = 250  $^{\circ}$ C. Reported melting points are uncorrected. Liquid chromatography was performed using forced flow (flash chromatography) of the indicated solvent system on silica gel (SiO<sub>2</sub>) 60 (230–400 mesh). All reactions were performed under nitrogen atmosphere in dry glassware. Glassware was dried in one of the following methods: oven-dried for at least eight hours at 150  $^{\circ}$ C, or flame-dried under dynamic vacuum, or flame-dried under a stream of nitrogen. Unless otherwise noted, all reagents were obtained from commercial suppliers and, where appropriate, purified prior to use. Acetal **1**,<sup>1</sup> lactone **S1**,<sup>2</sup> lactol **S2**,<sup>1</sup> enoxy silane **8**,<sup>3,4</sup> and silyl-ketene acetals **9**,<sup>4,5</sup> **10**,<sup>4,6</sup> and **11**<sup>4,7</sup> were prepared by reported methods. THF, Et<sub>2</sub>O, and CH<sub>2</sub>Cl<sub>2</sub> were dried by filtration through alumina according to the procedure of Grubbs.<sup>8</sup>

## II. Substrate Preparation

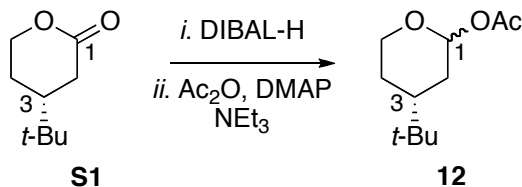

**C3 *t*-Bu Acetal 12.** To a cooled ( $-78$   $^{\circ}$ C) solution of lactone **S1**<sup>2</sup> (1.00 g, 6.40) in CH<sub>2</sub>Cl<sub>2</sub> (90 mL) was added diisobutylaluminum hydride (4.48 mL of a 1.5 M solution in toluene, 6.72 mmol) over 40 minutes. After stirring at  $-78$   $^{\circ}$ C for 3 h, acetic anhydride

(2.66 mL, 28.2 mmol) and pyridine (1.81 mL, 22.4 mmol) were added to the reaction mixture dropwise followed by dimethylaminopyridine (0.820 g, 6.72 mmol) in one portion. The reaction mixture was allowed to slowly warm to room temperature and stir overnight. After this time, saturated aqueous ammonium chloride (50 mL) and methyl *tert*-butyl ether (300 mL) were added to the reaction mixture. The resulting emulsion was filtered through Celite and the layers were separated. The organic layer was washed with saturated aqueous Na<sub>2</sub>HPO<sub>4</sub> (2 x 40 mL), saturated aqueous NaH<sub>2</sub>PO<sub>4</sub> (2 x 40 mL) and saturated aqueous CuSO<sub>4</sub> (2 x 40 mL). The organic layer was dried over Na<sub>2</sub>SO<sub>4</sub>, filtered, and concentrated by rotary evaporation to yield a clear yellow oil (3.40 g). The residue was purified by flash chromatography (80:20 hexane/EtOAc) to afford **12** as a clear colorless oil (0.857 g, 67%): <sup>1</sup>H NMR (400 MHz, CDCl<sub>3</sub>) δ 5.59 (dd, *J* = 9.5, 2.5, 1.0H), 4.09 (ddd, *J* = 11.6, 4.4, 1.7, 1.0H), 3.55 (dt, *J* = 11.6, 2.5, 1.1H), 2.11 (s, 3.1H), 1.85 (m, 1.0H), 1.54 (m, 1.1H), 1.40–1.23 (m, 3.4H), 0.87 (s, 9.5H); <sup>13</sup>C NMR (125 MHz, CDCl<sub>3</sub>) δ 169.6, 121.5, 95.3, 66.6, 44.4, 32.2, 31.8, 27.2, 26.2, 21.3; IR (thin film) 1754, 1232, 1060 cm<sup>-1</sup>; HRMS (TOF MS ES+) *m/z* calcd for C<sub>11</sub>H<sub>20</sub>O<sub>3</sub>Na (M + Na)<sup>+</sup> 223.1310, found 223.1304. Anal. Calcd for C<sub>11</sub>H<sub>20</sub>O<sub>3</sub>: C, 65.97; H, 10.07. Found: C, 65.69; H, 10.23.

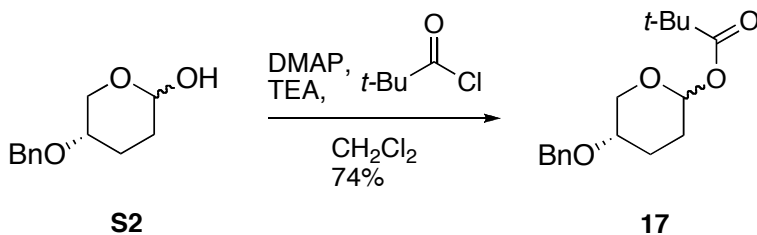

**Pivaloate Acetal 17.** To a cooled (0 °C) solution of dimethylaminopyridine (DMAP, 0.368 g, 3.01 mmol), triethylamine (4.2 mL, 30 mmol), 4-benzyloxytetrahydropyran-1-ol<sup>1</sup> (**S2**, 1.57 g, 7.53 mmol) in CH<sub>2</sub>Cl<sub>2</sub> (35 mL) was added

pivaloyl chloride (1.5 mL, 11 mmol) dropwise by syringe. The reaction mixture was then warmed to room temperature and stirred for 2 h. After this time, the reaction mixture was poured onto 160 mL of a saturated aqueous ammonium chloride solution. The layers were separated, and the aqueous phase was extracted with CH<sub>2</sub>Cl<sub>2</sub> (4 x 200 mL). The combined organic extracts were dried (MgSO<sub>4</sub>), filtered, and concentrated by rotary evaporation to yield a colorless oil, which formed white crystals of **17** (4.2 g) upon standing. The crystals were washed with pentane (2 x 10 mL), then further purified by flash chromatography (95:5 → 90:10 hexane/EtOAc) to afford **17** (as a 1: 1.5 mixture of anomers) as a white solid (1.6 g, 74%): mp 51–58 °C <sup>1</sup>H NMR (500 MHz, CDCl<sub>3</sub>) δ 7.39–7.29 (m, 13.2H), 6.05 (t, *J* = 2.9, 1H), 6.00 (br, 1.5H), 4.60 (m, 5.2H), 3.93 (dd, *J* = 12.4, 2.4, 1H), 3.87–3.78 (m, 2.6H), 3.68–3.56 (m, 4.2H), 2.22 (m, 1H), 2.06–1.97 (m, 2.7H), 1.94–1.89 (m, 5.7H), 1.64–1.59 (m, 2.3H), 1.25 (s, 22.6H); <sup>13</sup>C NMR (125 MHz, CDCl<sub>3</sub>) δ 138.4, 138.3, 128.6, 128.5, 127.9, 127.74, 127.71, 127.66, 92.0, 90.6, 72.0, 70.9, 70.5, 70.4, 64.5, 64.1, 39.15, 39.13, 27.7, 27.1, 24.9, 24.4, 22.7; IR (thin film) 1736, 1155, 1128, 1097, 1027 cm<sup>-1</sup>; HRMS (TOF MS ES+) *m/z* calcd for C<sub>15</sub>H<sub>20</sub>O<sub>2</sub>Na (M + Na)<sup>+</sup> 315.1572, found 315.1566. Anal. Calcd for C<sub>17</sub>H<sub>24</sub>O<sub>4</sub>: C, 69.84; H, 8.27. Found: C, 69.50; H, 8.24.

### III. Nucleophilic Substitution

**General Procedure for Nucleophilic Substitution Reactions of Acetal 1 and 12:** To a cooled (–78 °C) 0.1 M solution of acetal **1** (0.40–0.61 mmol, 1.0 equiv) and nucleophile (2.0–4.0 equiv) in CH<sub>2</sub>Cl<sub>2</sub> was added the Lewis acid (1.4–1.6 equiv) dropwise. After stirring at –78 °C for 1–5 min, the reaction mixture was maintained at –

45 °C for 1–2 h. A saturated aqueous solution of NaHCO<sub>3</sub> (4.0 mL) was added and the solution was warmed to 22 °C. The resulting biphasic mixture was diluted with CH<sub>2</sub>Cl<sub>2</sub> (2 mL) and H<sub>2</sub>O (2 mL) and the layers were separated. The aqueous layer was extracted with CH<sub>2</sub>Cl<sub>2</sub> (3 x 2 mL) and the combined organic layers were dried over Na<sub>2</sub>SO<sub>4</sub>, filtered, and concentrated *in vacuo*. Diastereomeric ratios were determined by GC and confirmed by GC/MS and <sup>1</sup>H NMR spectroscopy. Reported yields refer to purified material, and examples with each nucleophile are described in the text; those tables are reproduced here (Table 1 and Table 2).

**Table 1.** Nucleophile Screen with Me<sub>3</sub>SiOTf.

Nu–SiMe<sub>3</sub> =

| entry | Nu–SiMe <sub>3</sub> | <i>N</i> <sup>a</sup> | product  | <i>cis:trans</i> <sup>b,c</sup> | yield (%) <sup>d</sup> |
|-------|----------------------|-----------------------|----------|---------------------------------|------------------------|
| 1     | <b>7</b>             | 1.8                   | <b>2</b> | 6:94                            | 96                     |
| 2     | <b>8</b>             | 6.2                   | <b>3</b> | 10:90                           | 95                     |
| 3     | <b>9</b>             | 8.2                   | <b>4</b> | 71:29                           | 83                     |
| 4     | <b>10</b>            | 9.0                   | <b>5</b> | 85:15                           | 93                     |
| 5     | <b>11</b>            | 10.2                  | <b>6</b> | 89:11                           | 96                     |

<sup>a</sup> *N* = nucleophilicity parameter; see ref 9. <sup>b</sup> Determined by GC and <sup>1</sup>H NMR spectra the unpurified reaction mixtures. <sup>c</sup> Diastereoselectivities were independent of starting anomer ratio. <sup>d</sup> Isolated yield.

**Table 2.** Nucleophile screen with BF<sub>3</sub>•OEt<sub>2</sub>.

| entry | Nu–SiMe <sub>3</sub> | <i>N</i> <sup>a</sup> | product  | <i>cis:trans</i> <sup>b,c</sup> | yield (%) <sup>d</sup> |
|-------|----------------------|-----------------------|----------|---------------------------------|------------------------|
| 1     | <b>7</b>             | 1.8                   | <b>2</b> | 8:92                            | 82                     |
| 2     | <b>8</b>             | 6.2                   | <b>3</b> | 8:92                            | 87                     |

|   |           |      |          |       |    |
|---|-----------|------|----------|-------|----|
| 3 | <b>9</b>  | 8.2  | <b>4</b> | 50:50 | 88 |
| 4 | <b>10</b> | 9.0  | <b>5</b> | 58:42 | 80 |
| 5 | <b>11</b> | 10.2 | <b>6</b> | 60:40 | 86 |

<sup>a</sup> *N* = nucleophilicity parameter; see ref 9. <sup>b</sup> Determined by GC and <sup>1</sup>H NMR spectra of the unpurified reaction mixtures. <sup>c</sup> Diastereoselectivities were independent of starting anomer ratio. <sup>d</sup> Isolated yield.

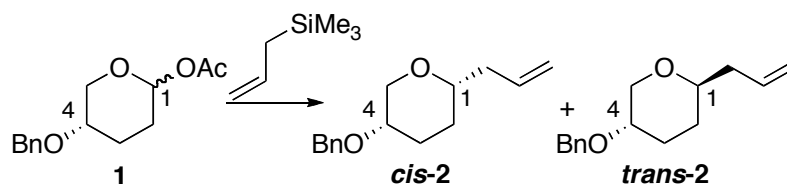

**Allyl tetrahydropyran 2: (Table 1, Entry 1 and Table 2, Entry 1).**<sup>1</sup> The standard procedure for nucleophilic substitution was followed with acetal **1** (1.0 equiv), allyltrimethylsilane (4.0 equiv), and Lewis acid ( $\text{BF}_3 \cdot \text{OEt}_2$  or  $\text{Me}_3\text{SiOTf}$ ; 1.6 equiv in each case). Purification by flash chromatography (97.5:2.5 hexanes/EtOAc) afforded the product as a colorless, clear oil. Product yields and diastereoselectivities are reported in Table 1 and Table 2. The major isomer *trans*-**2** was isolated as a pure sample. Characterization data (<sup>1</sup>H NMR, <sup>13</sup>C NMR) matches reported values.<sup>1</sup>

*trans*-**2**. <sup>1</sup>H NMR (500 MHz,  $\text{CDCl}_3$ )  $\delta$  7.35–7.24 (m, 5H), 5.80 (ddt, *J* = 17.2, 10.2, 7.0, 1H), 5.10–5.01 (m, 2H), 4.58 (d, *J* = 11.9, 1H), 4.52 (d, *J* = 11.9, 1H), 4.09 (ddd, *J* = 10.8, 4.7, 2.3, 1H), 3.43 (tt, *J* = 10.3, 4.6, 1H), 3.33–3.25 (m, 1H), 3.18 (t, *J* = 10.5, 1H), 2.30–2.22 (m, 1H), 2.22–2.12 (m, 2H), 1.78–1.70 (m, 1H), 1.49–1.38 (m, 1H), 1.36–1.25 (m, 1H); <sup>13</sup>C NMR (125 MHz,  $\text{CDCl}_3$ )  $\delta$  138.7, 135.0, 128.6, 127.82, 127.78, 117.0, 77.1, 73.2, 70.94, 70.92, 40.4, 30.3, 30.2; HRMS (TOF MS ES+) *m/z* calcd for  $\text{C}_{15}\text{H}_{20}\text{O}_2\text{Na}$  (*M* + Na)<sup>+</sup> 255.1361, found 255.1369.

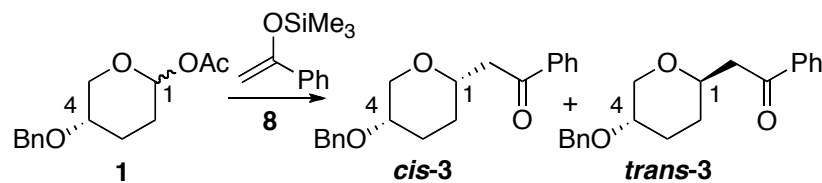

**Ketone 3 (Table 1, Entry 2 and Table 2, Entry 2).**<sup>10-12</sup> The standard procedure for nucleophilic substitution was followed with acetal **1** (1.0 equiv), enoxy silane **8** (4.0–4.1 equiv), and  $\text{BF}_3 \cdot \text{OEt}_2$  (1.6 equiv) or  $\text{Me}_3\text{SiOTf}$  (1.4 equiv). Purification by flash chromatography (90:10 hexanes/EtOAc) afforded the product as an oily white solid. Product yields and diastereoselectivities are reported in Table 1 and Table 2. The major isomer *trans*-**3** was isolated as a pure sample.

*trans*-**3**. mp 59–60.5 °C;  $^1\text{H}$  NMR (500 MHz,  $\text{CDCl}_3$ )  $\delta$  7.95 (d,  $J = 7.9$ , 2H), 7.57 (t,  $J = 7.3$ , 1H), 7.46 (t,  $J = 7.7$ , 2H), 7.37–7.27 (m, 5H), 4.59 (d,  $J = 11.9$ , 1H), 4.53 (d,  $J = 11.9$ , 1H), 4.06 (ddd,  $J = 10.8$ , 4.6, 2.2, 1H), 3.98–3.88 (m, 1H), 3.48 (tt,  $J = 10.0$ , 4.5, 1H), 3.29 (dd,  $J = 16.3$ , 6.7, 1H), 3.24 (t,  $J = 10.6$ , 1H), 2.93 (dd,  $J = 16.3$ , 5.8, 1H), 2.27–2.18 (m, 1H), 1.97–1.87 (m, 1H), 1.60–1.48 (m, 1H), 1.46–1.35 (m, 1H);  $^{13}\text{C}$  NMR (125 MHz,  $\text{CDCl}_3$ )  $\delta$  198.2, 138.7, 137.3, 133.4, 128.8, 128.6, 128.4, 127.9, 127.8, 74.2, 73.0, 71.0, 70.9, 44.7, 30.8, 30.2; IR (thin film) 3061, 2860, 2352, 1681, 1596  $\text{cm}^{-1}$ ; HRMS (TOF MS ES+)  $m/z$  calcd for  $\text{C}_{20}\text{H}_{22}\text{O}_3\text{Na}$  ( $\text{M} + \text{Na}$ )<sup>+</sup> 333.1467, found 333.1460. Anal. Calcd for  $\text{C}_{20}\text{H}_{22}\text{O}_3$ : C, 77.39; H, 7.14. Found: C, 77.14; H, 7.07.

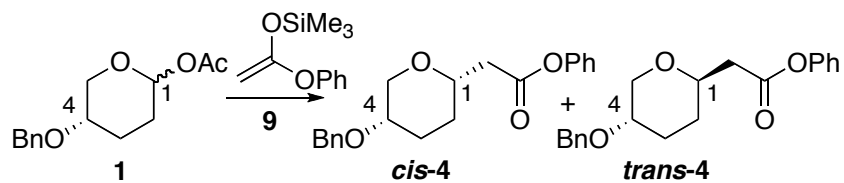

**Ester 4 (Table 1, Entry 3 and Table 2, Entry 3).** The standard procedure for nucleophilic substitution was followed with acetal **1**, silyl ketene acetal **9** (2.0 equiv for the  $\text{BF}_3 \cdot \text{OEt}_2$ -mediated reaction, 4.0 equiv for the  $\text{Me}_3\text{SiOTf}$ -mediated reaction), and Lewis acid ( $\text{BF}_3 \cdot \text{OEt}_2$  or  $\text{Me}_3\text{SiOTf}$ ; 1.6 equiv in each case). Purification by flash chromatography (80:20 hexanes/EtOAc) afforded the product as a colorless, clear oil. Product yields and diastereoselectivities are reported in Table 1 and Table 2. Isomers *cis*-**4** and *trans*-**4** were isolated as pure samples for analytical purposes.

*cis*-**4**.  $^1\text{H}$  NMR (500 MHz,  $\text{CDCl}_3$ )  $\delta$  7.40–7.17 (m, 8H), 7.07 (d,  $J = 7.9$ , 2H), 4.62–4.54 (m, 2H), 4.11 (d,  $J = 12.5$ , 1H), 3.92 (dddd,  $J = 10.4$ , 7.5, 5.3, 2.0, 1H), 3.54 (dd,  $J = 12.5$ , 1.2, 1H), 3.42 (br s, 1H), 2.86 (dd,  $J = 15.5$ , 7.9, 1H), 2.67 (dd,  $J = 15.5$ , 5.2, 1H), 2.12–2.06 (m, 1H), 1.86 (m, 1H), 1.71–1.63 (m, 1H), 1.62–1.55 (m, 1H);  $^{13}\text{C}$  NMR (125 MHz,  $\text{CDCl}_3$ )  $\delta$  170.0, 150.8, 138.8, 129.5, 128.5, 127.8, 127.7, 125.9, 121.8, 74.1, 70.4, 70.2, 69.7, 41.4, 27.0, 26.4; IR (thin film) 3066, 3031, 2944, 2858, 1756, 1594  $\text{cm}^{-1}$ .

*trans*-**4**.  $^1\text{H}$  NMR (500 MHz,  $\text{CDCl}_3$ )  $\delta$  7.40–7.19 (m, 8H), 7.08 (d,  $J = 7.7$ , 2H), 4.60 (d,  $J = 11.9$ , 1H), 4.54 (d,  $J = 11.9$ , 1H), 4.12 (ddd,  $J = 10.8$ , 4.7, 2.2, 1H), 3.84 (dddd,  $J = 10.6$ , 7.6, 5.2, 2.1, 1H), 3.49 (tt,  $J = 10.1$ , 4.5, 1H), 3.26 (t,  $J = 10.5$ , 1H), 2.74 (dd,  $J = 15.2$ , 7.9, 1H), 2.65 (dd,  $J = 15.2$ , 5.2, 1H), 2.27–2.19 (m, 1H), 1.92–1.84 (m, 1H), 1.57–1.40 (m, 2H);  $^{13}\text{C}$  NMR (125 MHz,  $\text{CDCl}_3$ )  $\delta$  169.9, 150.8, 138.6, 129.6, 128.7, 127.9, 127.8, 126.1, 121.8, 74.2, 72.8, 71.0, 70.9, 41.1, 30.5, 30.1; IR (thin film) 3064, 3033, 2939, 2863, 1756, 1594  $\text{cm}^{-1}$ ; HRMS (TOF MS ES+)  $m/z$  calcd for  $\text{C}_{20}\text{H}_{22}\text{O}_4\text{Na}$  ( $\text{M} + \text{Na}$ )<sup>+</sup> 349.1416, found 349.1420. Anal. Calcd for  $\text{C}_{20}\text{H}_{22}\text{O}_4$ : C, 73.60; H, 6.79. Found: C, 73.22; H, 6.80.



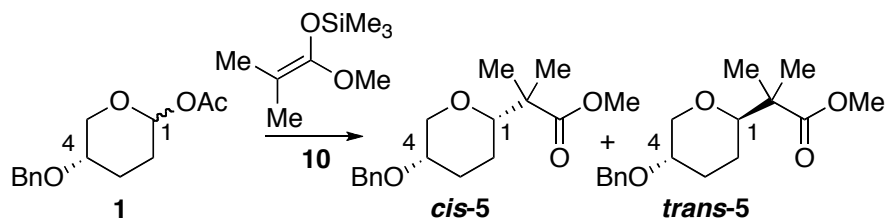

**Ester 5 (Table 1, Entry 4 and Table 2, Entry 4).** The standard procedure for nucleophilic substitution was followed with acetal **1**, silyl ketene acetal **10** (5.0 equiv for the  $\text{BF}_3 \cdot \text{OEt}_2$ -mediated reaction, 4.3 equiv for the  $\text{Me}_3\text{SiOTf}$ -mediated reaction), and Lewis acid ( $\text{BF}_3 \cdot \text{OEt}_2$  or  $\text{Me}_3\text{SiOTf}$ ; 1.6 equiv in each case). Purification by flash chromatography (90:10 hexanes/EtOAc) afforded the product as a colorless, clear oil. Product yields and diastereoselectivities are reported in Table 1 and Table 2. Isomers *cis*-**5** and *trans*-**5** were isolated as pure samples for analytical purposes.

*cis*-**5**.  $^1\text{H}$  NMR (500 MHz,  $\text{CDCl}_3$ )  $\delta$  7.38–7.24 (m, 5H), 4.59 (d,  $J = 12.3$ , 1H), 4.51 (d,  $J = 12.3$ , 1H), 4.12 (d,  $J = 12.5$ , 1H), 3.68 (s, 3H), 3.55 (dd,  $J = 11.4$ , 1.7, 1H), 3.45 (dd,  $J = 12.5$ , 1.3, 1H), 3.38 (br s, 1H), 2.10 (dt,  $J = 13.9$ , 3.1, 1H), 1.81 (qd,  $J = 13.1$ , 3.7, 1H), 1.67–1.57 (m, 1H), 1.31 (br d,  $J = 12.8$ , 1H), 1.23 (s, 3H), 1.14 (s, 3H);  $^{13}\text{C}$  NMR (125 MHz,  $\text{CDCl}_3$ )  $\delta$  177.7, 139.1, 128.5, 127.64, 127.58, 82.4, 70.8, 69.9, 69.8, 52.0, 46.9, 27.8, 21.3, 20.64, 20.56; IR (neat) 2950, 2858, 1730, 1454, 1143, 1115  $\text{cm}^{-1}$ ; HRMS (TOF MS ES+)  $m/z$  calcd for  $\text{C}_{17}\text{H}_{24}\text{O}_4\text{Na}$  ( $\text{M} + \text{Na}$ ) $^+$  315.1572, found 315.1569. Anal. Calcd for  $\text{C}_{17}\text{H}_{24}\text{O}_4$ : C, 69.84; H, 8.27. Found: C, 70.06; H, 8.32.

*trans*-**5**.  $^1\text{H}$  NMR (500 MHz,  $\text{CDCl}_3$ )  $\delta$  7.38–7.24 (m, 5H), 4.57 (d,  $J = 12.0$ , 1H), 4.52 (d,  $J = 12.0$ , 1H), 4.09 (ddd,  $J = 10.7$ , 4.7, 2.3, 1H), 3.67 (s, 3H), 3.46–3.37 (m, 2H), 3.16 (t,  $J = 10.5$ , 1H), 2.26–2.18 (m, 1H), 1.66–1.60 (m, 1H), 1.50–1.34 (m, 2H), 1.16 (s, 3H), 1.11 (s, 3H);  $^{13}\text{C}$  NMR (125 MHz,  $\text{CDCl}_3$ )  $\delta$  177.4, 138.8, 128.6, 127.9, 127.8, 82.3, 73.2, 71.3, 71.0, 52.1, 46.4, 30.3, 24.7, 21.7, 20.7; IR (neat) 2948, 2864, 1734, 1454, 1275,

1093  $\text{cm}^{-1}$ ; HRMS (TOF MS ES+)  $m/z$  calcd for  $\text{C}_{17}\text{H}_{24}\text{O}_4\text{Na}$  ( $\text{M} + \text{Na}$ )<sup>+</sup> 315.1572, found 315.1577. Anal. Calcd for  $\text{C}_{17}\text{H}_{24}\text{O}_4$ : C, 69.84; H, 8.27. Found: C, 70.00; H, 8.31.

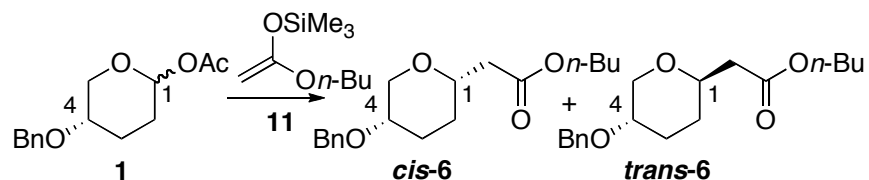

**Ester 6 (Table 1, Entry 5 and Table 2, Entry 5).** The standard procedure for nucleophilic substitution was followed with acetal **1**, silyl ketene acetal **11** (2.0 equiv for the  $\text{BF}_3 \cdot \text{OEt}_2$ -mediated reaction, 3.8 equiv for the  $\text{Me}_3\text{SiOTf}$ -mediated reaction), and  $\text{BF}_3 \cdot \text{OEt}_2$  (1.5 equiv) or  $\text{Me}_3\text{SiOTf}$  (1.6 equiv). Purification by flash chromatography (95:5 hexanes/EtOAc) afforded the product as a colorless, clear oil. Product yields and diastereoselectivities are reported in Table 1. Isomers *cis*-**6** and *trans*-**6** were isolated as pure samples for analytical purposes.

*cis*-**6**.  $^1\text{H}$  NMR (500 MHz,  $\text{CDCl}_3$ )  $\delta$  7.38–7.24 (m, 5H), 4.60–4.53 (m, 2H), 4.12–4.03 (m, 3H), 3.85–3.77 (m, 1H), 3.51 (dd,  $J = 12.5, 1.1, 1\text{H}$ ), 3.40 (br s, 1H), 2.62 (dd,  $J = 15.5, 7.7, 1\text{H}$ ), 2.41 (dd,  $J = 15.5, 5.4, 1\text{H}$ ), 2.10–2.01 (m, 1H), 1.77 (qd,  $J = 13.2, 3.6, 1\text{H}$ ), 1.69–1.57 (m, 3H), 1.51 (d,  $J = 12.0, 1\text{H}$ ), 1.36 (sextet,  $J = 7.6, 2\text{H}$ ), 0.92 (t,  $J = 7.5, 3\text{H}$ );  $^{13}\text{C}$  NMR (125 MHz,  $\text{CDCl}_3$ )  $\delta$  171.6, 138.8, 128.5, 127.7, 127.6, 74.2, 70.4, 70.1, 69.6, 64.5, 41.4, 30.8, 27.0, 26.4, 19.2, 13.9; IR (thin film) 2958, 2871, 1733, 1455, 1115  $\text{cm}^{-1}$ ; HRMS (TOF MS ES+)  $m/z$  calcd for  $\text{C}_{18}\text{H}_{26}\text{O}_4\text{Na}$  ( $\text{M} + \text{Na}$ )<sup>+</sup> 329.1729, found 329.1718. Anal. Calcd for  $\text{C}_{18}\text{H}_{26}\text{O}_4$ : C, 70.56; H, 8.55. Found: C, 70.39; H, 8.48.

*trans*-**6**.  $^1\text{H}$  NMR (500 MHz,  $\text{CDCl}_3$ )  $\delta$  7.35–7.25 (m, 5H), 4.58 (d,  $J = 11.9, 1\text{H}$ ), 4.52 (d,  $J = 11.8, 1\text{H}$ ), 4.14–4.04 (m, 3H), 3.75–3.68 (m, 1H), 3.45 (tt,  $J = 10.0, 4.6, 1\text{H}$ ), 3.21

(t,  $J = 10.5$ , 1H), 2.49 (dd,  $J = 15.1$ , 7.8, 1H), 2.39 (dd,  $J = 15.1$ , 5.2, 1H), 2.19 (br d,  $J = 12.4$ , 1H), 1.79 (br d,  $J = 12.9$ , 1H), 1.61 (quintet,  $J = 6.8$ , 2H), 1.54–1.44 (m, 1H), 1.42–1.32 (m, 3H), 0.92 (t,  $J = 7.5$ , 3H);  $^{13}\text{C}$  NMR (125 MHz,  $\text{CDCl}_3$ )  $\delta$  171.4, 138.6, 128.6, 127.9, 127.8, 74.2, 72.8, 71.0, 70.9, 64.6, 41.2, 30.8, 30.4, 30.1, 19.3, 13.9; IR (thin film) 2960, 2867, 1733, 1455, 1090  $\text{cm}^{-1}$ ; HRMS (TOF MS ES+)  $m/z$  calcd for  $\text{C}_{18}\text{H}_{26}\text{O}_4\text{Na}$  ( $\text{M} + \text{Na}$ ) $^+$  329.1729, found 329.1720. Anal. Calcd for  $\text{C}_{18}\text{H}_{26}\text{O}_4$ : C, 70.56; H, 8.55. Found: C, 70.49; H, 8.70.

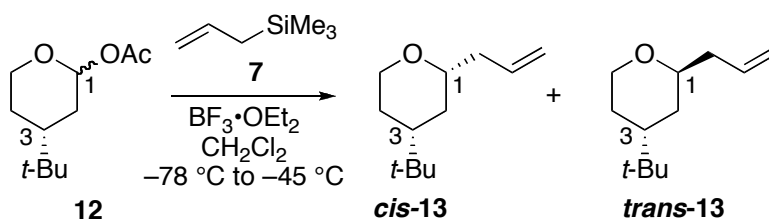

**Allyl tetrahydropyran 13:** The standard procedure for nucleophilic substitution was followed with acetal **12** (0.041 g, 0.21 mmol), allyltrimethylsilane (0.130 mL, 0.82 mmol), and  $\text{BF}_3\cdot\text{OEt}_2$  (0.040 mL, 0.32 mmol). Analysis of the crude mixture by GC revealed a 99:1 *trans-13* to *cis-13* ratio. Purification by flash chromatography (98:2 pentane/ $\text{Et}_2\text{O}$ ) afforded *trans-13* as a colorless, clear oil (0.024 g, 67%):  $^1\text{H}$  NMR (500 MHz,  $\text{CDCl}_3$ )  $\delta$  5.80 (ddt,  $J = 17.1$ , 10.1, 7.0, 1H), 5.12–5.04 (m, 2H), 4.04–3.98 (m, 1H), 3.73 (ddd,  $J = 11.7$ , 4.9, 2.0, 1H), 3.63 (td,  $J = 11.9$ , 2.7, 1H), 2.60–2.52 (m, 1H), 2.29 (dt,  $J = 14.3$ , 7.2, 1H), 1.58–1.46 (m, 3H), 1.45–1.33 (m, 2H), 0.84 (s, 9H);  $^{13}\text{C}$  NMR (125 MHz,  $\text{CDCl}_3$ )  $\delta$  135.8, 116.7, 72.9, 61.4, 39.5, 35.2, 32.3, 29.2, 27.6, 27.2; IR (thin film) 3078, 2944, 2860, 1642, 1364, 1125  $\text{cm}^{-1}$ ; HRMS (TOF MS APCI)  $m/z$  calcd for  $\text{C}_{12}\text{H}_{23}\text{O}$  ( $\text{M} + \text{H}$ ) $^+$  183.1749, found 183.1741. Anal. Calcd for  $\text{C}_{12}\text{H}_{22}\text{O}$ : C, 79.06; H, 12.16. Found: C, 79.02; H, 12.09.

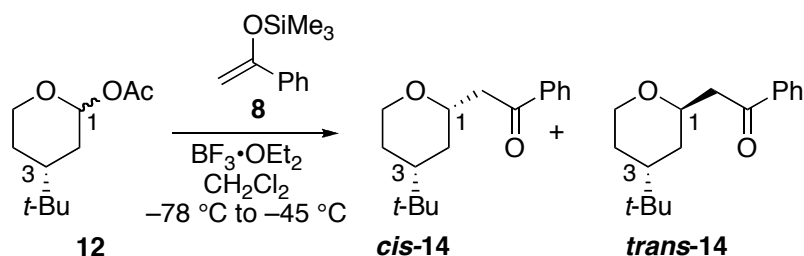

**Ketone 14:** The standard procedure for nucleophilic substitution was followed with acetal **12** (0.040 g, 0.20 mmol), enoxy silane **8** (0.160 g, 0.83 mmol), and  $\text{BF}_3 \cdot \text{OEt}_2$  (0.040 mL, 0.32 mmol). Analysis of the crude mixture by GC revealed a 98:2 *trans-14* to *cis-14* ratio. Purification by flash chromatography (95:5 hexane/EtOAc) afforded *trans-14* as a white solid (0.043 g, 83%): mp 74.5–75.0 °C;  $^1\text{H}$  NMR (500 MHz,  $\text{CDCl}_3$ )  $\delta$  7.99–7.96 (m, 2H), 7.59–7.54 (m, 1H), 7.49–7.45 (m, 2H), 4.70–4.64 (m, 1H), 3.79 (ddd,  $J = 11.7, 4.9, 2.1$ , 1H), 3.68 (td,  $J = 11.9, 2.7$ , 1H), 3.44 (dd,  $J = 15.3, 6.5$ , 1H), 3.22 (dd,  $J = 15.4, 7.4$ , 1H), 1.67–1.56 (m, 3H), 1.49–1.33 (m, 2H), 0.84 (s, 9H);  $^{13}\text{C}$  NMR (125 MHz,  $\text{CDCl}_3$ )  $\delta$  198.8, 137.2, 133.3, 128.8, 128.4, 70.1, 62.2, 40.2, 39.8, 32.3, 30.0, 27.4, 27.2; IR (thin film) 2956, 2865, 1683  $\text{cm}^{-1}$ ; HRMS (TOF MS ES+)  $m/z$  calcd for  $\text{C}_{17}\text{H}_{24}\text{O}_2\text{Na}$  ( $\text{M} + \text{Na}$ ) $^+$  283.1674, found 283.1680. Anal. Calcd for  $\text{C}_{17}\text{H}_{24}\text{O}_2$ : C, 78.42; H, 9.29. Found: C, 78.24; H, 9.31.

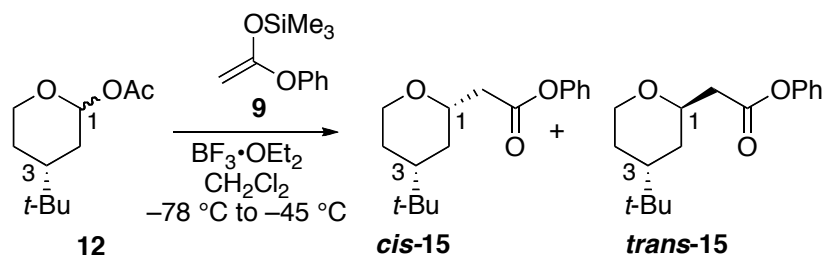

**Ester 15:** The standard procedure for nucleophilic substitution was followed with acetal **12** (0.042 g, 0.21 mmol), silyl ketene acetal **9** (0.160 g, 0.77 mmol), and  $\text{BF}_3 \cdot \text{OEt}_2$  (0.040 mL, 0.32 mmol). Analysis of the crude mixture by GC revealed a 83:17 *trans*-**15** to *cis*-**15** ratio. Purification by flash chromatography (95:5 hexane/EtOAc) afforded a mixture of *trans*-**15** and *cis*-**15** as a colorless, clear oil (0.051 g, 93%). The *trans*-**15** isomer was isolated as a pure sample for analytical purposes:  $^1\text{H}$  NMR (500 MHz,  $\text{CDCl}_3$ )  $\delta$  7.37 (t,  $J = 7.6$ , 2H), 7.22 (t,  $J = 7.5$ , 1H), 7.09 (d,  $J = 7.6$ , 2H), 4.67–4.60 (m, 1H), 3.86–3.80 (m, 1H), 3.73 (td,  $J = 11.9$ , 2.4, 1H), 3.11 (dd,  $J = 14.3$ , 8.8, 1H), 2.73 (dd,  $J = 14.3$ , 6.4, 1H), 1.70–1.58 (m, 3H), 1.49–1.34 (m, 2H), 0.87 (s, 9H);  $^{13}\text{C}$  NMR (125 MHz,  $\text{CDCl}_3$ )  $\delta$  170.3, 150.9, 129.6, 126.0, 121.8, 70.5, 62.0, 39.8, 36.7, 32.3, 29.9, 27.4, 27.2; IR (thin film) 2954, 2867, 1756, 1594, 1493, 1196  $\text{cm}^{-1}$ ; HRMS (TOF MS ES+)  $m/z$  calcd for  $\text{C}_{17}\text{H}_{24}\text{O}_3\text{Na}$  ( $\text{M} + \text{Na}$ ) $^+$  299.1623, found 299.1621. Anal. Calcd for  $\text{C}_{17}\text{H}_{24}\text{O}_3$ : C, 73.88; H, 8.75. Found: C, 74.14; H, 8.87.

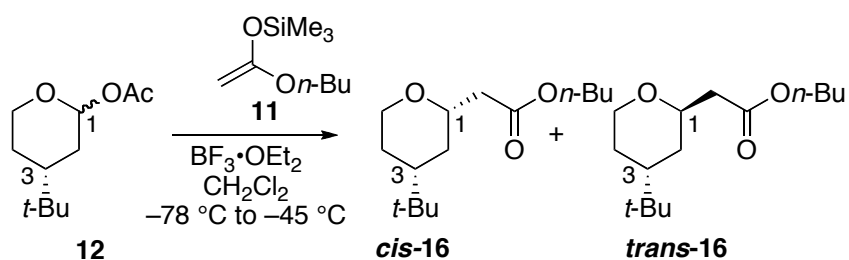

**Ester 16:** The standard procedure for nucleophilic substitution was followed with acetal **12** (0.040 g, 0.20 mmol), silyl ketene acetal **11** (0.154 g, 0.818 mmol), and  $\text{BF}_3 \cdot \text{OEt}_2$  (0.040 mL, 0.32 mmol). Analysis of the crude mixture by GC revealed a 66:34 *trans*-**16** to *cis*-**16** ratio. Purification by flash chromatography (97.5:2.5 hexane/EtOAc)

afforded a mixture of *trans*-**16** and *cis*-**16** as a colorless, clear oil (0.035 g, 69%). Isomers *cis*-**16** and *trans*-**16** were isolated as pure samples for analytical purposes.

*cis*-**16**. <sup>1</sup>H NMR (500 MHz, CDCl<sub>3</sub>) δ 4.10 (t, *J* = 6.7, 2H), 4.05–4.01 (m, 1H), 3.71 (dddd, *J* = 10.3, 7.4, 5.2, 1.9, 1H), 3.41 (td, *J* = 11.5, 2.0, 1H), 2.53 (dd, *J* = 15.0, 7.9, 1H), 2.40 (dd, *J* = 15.0, 5.2, 1H), 1.67–1.58 (m, 3H), 1.53 (dd, *J* = 9.3, 2.0, 1H), 1.43–1.35 (m, 2H), 1.33–1.24 (m, 2H), 1.08–0.99 (m, 1H), 0.93 (t, *J* = 7.4, 3H), 0.85 (s, 9H); <sup>13</sup>C NMR (125 MHz, CDCl<sub>3</sub>) δ 171.7, 74.8, 68.7, 64.5, 45.8, 42.2, 33.0, 32.3, 30.8, 27.3, 27.1, 19.3, 13.9; IR (thin film) 2958, 2869, 1737, 1468, 1364 cm<sup>-1</sup>; HRMS (TOF MS ES+) *m/z* calcd for C<sub>15</sub>H<sub>29</sub>O<sub>3</sub> (M + H)<sup>+</sup> 257.2117, found 257.2116. Anal. Calcd for C<sub>15</sub>H<sub>28</sub>O<sub>3</sub>: C, 70.27; H, 11.01. Found: C, 70.44; H, 11.25.

*trans*-**16**. <sup>1</sup>H NMR (500 MHz, CDCl<sub>3</sub>) δ 4.52–4.45 (m, 1H), 4.14–4.04 (m, 2H), 3.78–3.73 (m, 1H), 3.63 (td, *J* = 11.7, 2.4, 1H), 2.85 (dd, *J* = 14.4, 8.5, 1H), 2.49 (dd, *J* = 14.4, 6.5, 1H), 1.64–1.50 (m, 5H), 1.42–1.31 (m, 4H), 0.93 (t, *J* = 7.4, 3H), 0.84 (s, 9H); <sup>13</sup>C NMR (125 MHz, CDCl<sub>3</sub>) δ 171.9, 70.4, 64.6, 61.8, 39.7, 36.6, 32.2, 30.9, 29.9, 27.4, 27.1, 19.3, 13.9; IR (thin film) 2958, 2869, 1737, 1468, 1366 cm<sup>-1</sup>; HRMS (TOF MS ES+) *m/z* calcd for C<sub>15</sub>H<sub>29</sub>O<sub>3</sub> (M + H)<sup>+</sup> 257.2117, found 257.2125. Anal. Calcd for C<sub>15</sub>H<sub>28</sub>O<sub>3</sub>: C, 70.27; H, 11.01. Found: C, 70.08; H, 11.21.

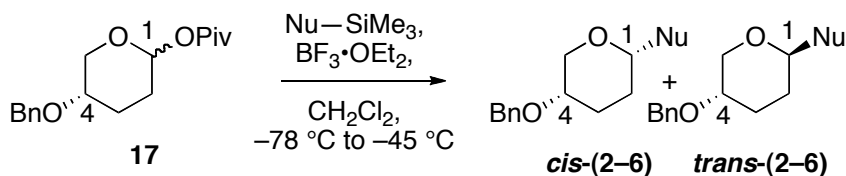

### General Procedure for Nucleophilic Substitution Reactions of Pivaloate

**Acetal 17:** To a cooled (−78 °C) 0.1 M solution of **17** (0.40–0.69 mmol, 1.0 equiv) and

nucleophile (3.5 – 4.0 equiv) in CH<sub>2</sub>Cl<sub>2</sub> was added BF<sub>3</sub>•OEt<sub>2</sub> (1.6–3.5 equiv) dropwise. After stirring at –78 °C for 1–5 min, the reaction mixture was maintained at –45 °C for 1–2 h. Upon warming to 22 °C, a saturated aqueous solution of NaHCO<sub>3</sub> (4.0 mL) was added. The resulting biphasic mixture was diluted with CH<sub>2</sub>Cl<sub>2</sub> (5 mL) and H<sub>2</sub>O (2 mL), and the layers were separated. The aqueous layer was extracted with CH<sub>2</sub>Cl<sub>2</sub> (3 x 8 mL) and the combined organic layers were dried over MgSO<sub>4</sub>, filtered, and concentrated *in vacuo*. Diastereomeric ratios (Table S1) were determined by GC and confirmed by <sup>1</sup>H NMR spectroscopy. Reported yields (Table S1) refer to purified material.

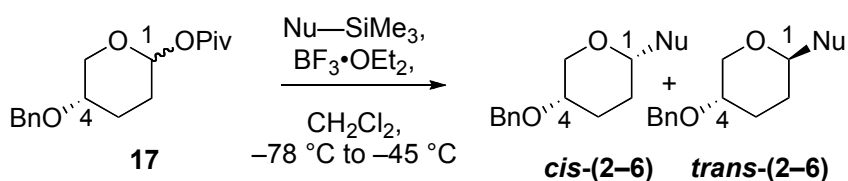

**Table S1.** Nucleophilic Substitution Reactions with Acetal **17**.

| entry | Nu—SiMe <sub>3</sub> | product  | <i>cis</i> : <i>trans</i> <sup>a</sup> | yield (%) <sup>b</sup> |
|-------|----------------------|----------|----------------------------------------|------------------------|
| 1     |                      | <b>2</b> | 12 : 88                                | 78                     |
| 2     |                      | <b>3</b> | 10 : 90                                | 67                     |
| 3     |                      | <b>4</b> | 49 : 51                                | 47                     |
| 4     |                      | <b>6</b> | 52 : 48                                | 18                     |

<sup>a</sup>Measured by GC analysis of unpurified reaction mixture.

<sup>b</sup>Based on purified products.

#### IV. Stereochemical Proofs of Nucleophilic Substitution Products

**Figure S1.** Diagnostic  $^1\text{H}$ - $^1\text{H}$  coupling constants for *trans*-**3**.

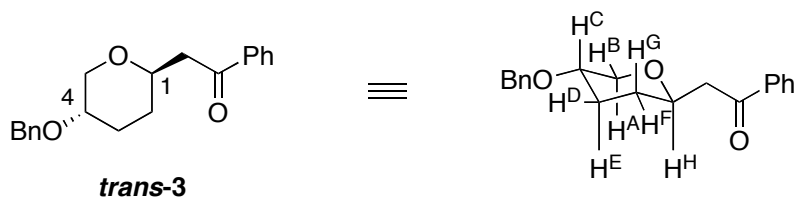

$\text{H}^{\text{A}}$ : t,  $J = 10.6$  Hz (gem  $\text{ax}^{\text{A}}\text{-eq}^{\text{B}}$ ,  $\text{ax}^{\text{A}}\text{-ax}^{\text{C}}$ )  
 $\text{H}^{\text{C}}$ : tt,  $J = 10.0$  Hz ( $\text{ax}^{\text{C}}\text{-ax}^{\text{A}}$ ,  $\text{ax}^{\text{C}}\text{-ax}^{\text{E}}$ ,  
 $4.5$  Hz ( $\text{ax}^{\text{C}}\text{-eq}^{\text{B}}$ ,  $\text{ax}^{\text{C}}\text{-eq}^{\text{D}}$ )

**Figure S2.** Relevant DPGFSE-NOE data (mixing time 2.0 s) for *trans*-**3**.

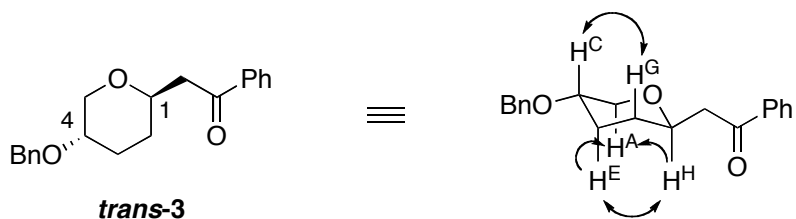

$\text{H}^{\text{C}}$  irradiated:  $\text{H}^{\text{G}}$  (3.7%)  
 $\text{H}^{\text{E}}$  irradiated:  $\text{H}^{\text{A}}$  (3.8%),  $\text{H}^{\text{H}}$  (8.3%)  
 $\text{H}^{\text{G}}$  irradiated:  $\text{H}^{\text{C}}$  (8.2%)  
 $\text{H}^{\text{H}}$  irradiated:  $\text{H}^{\text{A}}$  (9.3%),  $\text{H}^{\text{E}}$  (4.1%)

**Figure S3.** Diagnostic  $^1\text{H}$ - $^1\text{H}$  coupling constants for *cis*-**4**.

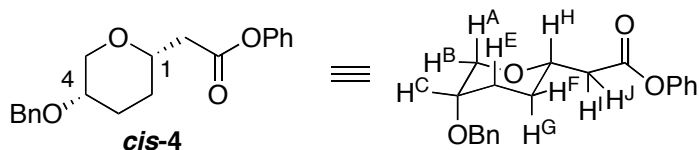

$\text{H}^{\text{A}}$ : dd,  $J = 12.5$  Hz (gem  $\text{ax}^{\text{A}}\text{-eq}^{\text{B}}$ ),  $1.2$  Hz ( $\text{ax}^{\text{A}}\text{-eq}^{\text{C}}$ )  
 $\text{H}^{\text{C}}$ : br s  
 $\text{H}^{\text{H}}$ : dddd,  $J = 10.4$  Hz ( $\text{ax}^{\text{H}}\text{-ax}^{\text{G}}$ ),  $7.5$  Hz ( $\text{ax}^{\text{H}}\text{-H}^{\text{I}}$ ),  
 $5.3$  Hz ( $\text{ax}^{\text{H}}\text{-H}^{\text{J}}$ ),  $2.0$  Hz ( $\text{ax}^{\text{H}}\text{-eq}^{\text{F}}$ )



**Figure S4.** Relevant DPGSE-NOE data (mixing time 2.0 s) for *cis-4*.

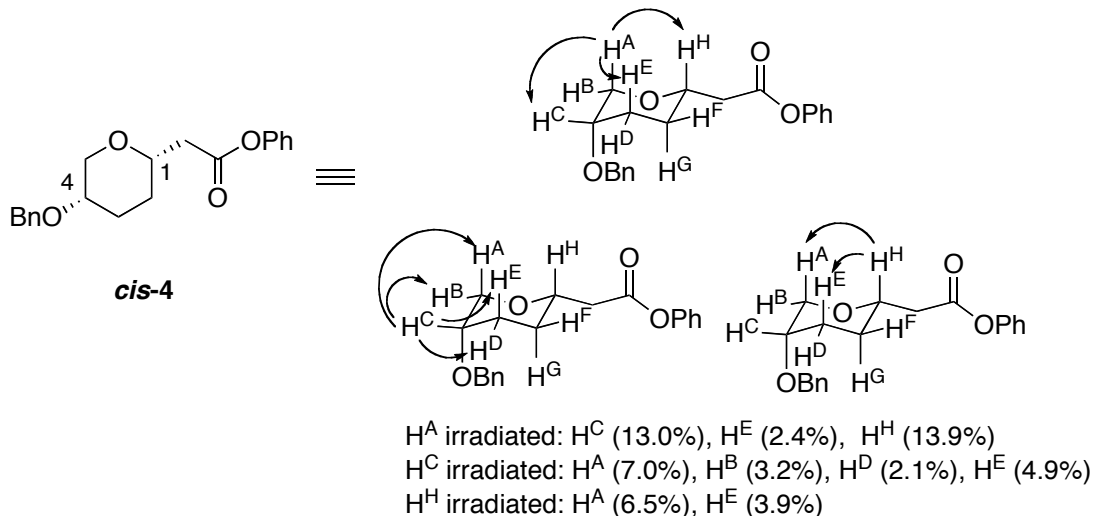

**Figure S5.** Diagnostic  $^1H$ - $^1H$  coupling constants for *trans-4*.

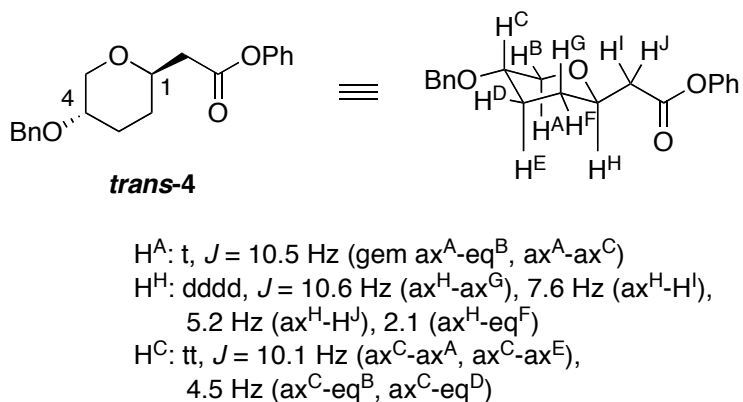

**Figure S6.** Relevant DPGSE-NOE data (mixing time 2.0 s) for *trans-4*.

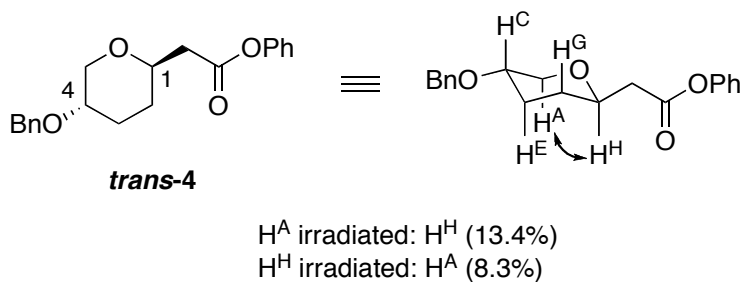

**Figure S7.** Diagnostic  $^1\text{H}$ - $^1\text{H}$  coupling constants for *cis*-**5**.

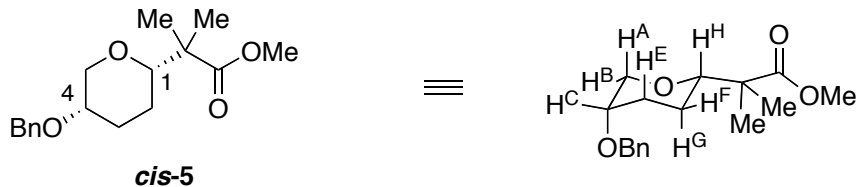

$\text{H}^{\text{A}}$ : dd,  $J = 12.5$  Hz (gem  $\text{ax}^{\text{A}}\text{-eq}^{\text{B}}$ ),  $1.3$  Hz ( $\text{ax}^{\text{A}}\text{-eq}^{\text{C}}$ )

$\text{H}^{\text{C}}$ : br s

$\text{H}^{\text{H}}$ : dd,  $J = 11.4$  Hz ( $\text{ax}^{\text{H}}\text{-ax}^{\text{G}}$ ),  $1.7$  Hz ( $\text{ax}^{\text{H}}\text{-eq}^{\text{F}}$ )

**Figure S8.** Relevant DPGSE-NOE data (mixing time 2.0 s) for *cis*-**5**.

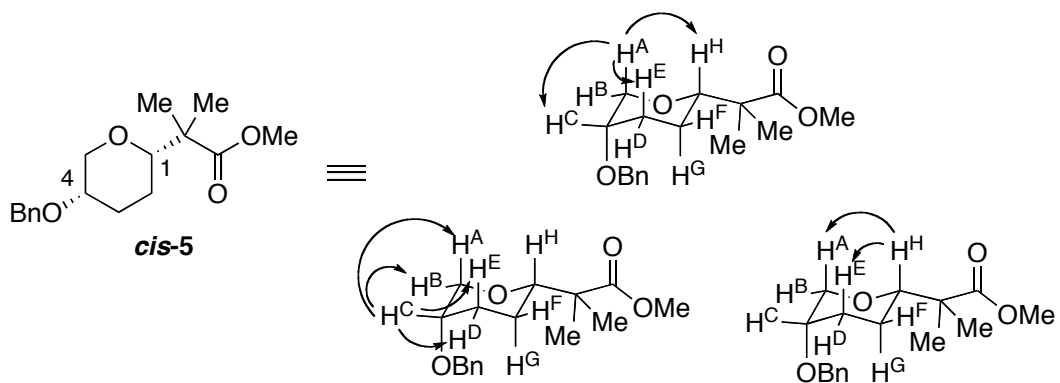

$\text{H}^{\text{A}}$  irradiated:  $\text{H}^{\text{C}}$  (7.7%),  $\text{H}^{\text{E}}$  (2.9%),  $\text{H}^{\text{H}}$  (12.1%)

$\text{H}^{\text{C}}$  irradiated:  $\text{H}^{\text{A}}$  (4.1%),  $\text{H}^{\text{B}}$  (3.2%),  $\text{H}^{\text{D}}$  (2.1%),  $\text{H}^{\text{E}}$  (4.7%)

$\text{H}^{\text{H}}$  irradiated:  $\text{H}^{\text{A}}$  (6.3%),  $\text{H}^{\text{E}}$  (3.8%)

**Figure S9.** Diagnostic  $^1\text{H}$ - $^1\text{H}$  coupling constants for *trans*-**5**.

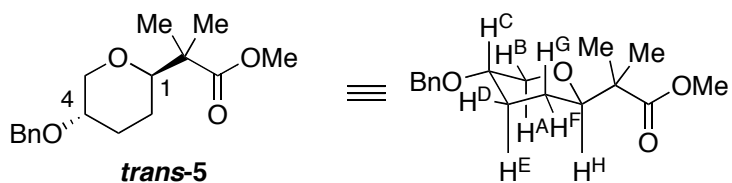

$\text{H}^{\text{A}}$ : t,  $J = 10.5$  Hz (gem  $\text{ax}^{\text{A}}\text{-eq}^{\text{B}}$ ,  $\text{ax}^{\text{A}}\text{-ax}^{\text{C}}$ )

**Figure S10.** Relevant DPGSE-NOE data (mixing time 2.0 s) for *trans-5*.

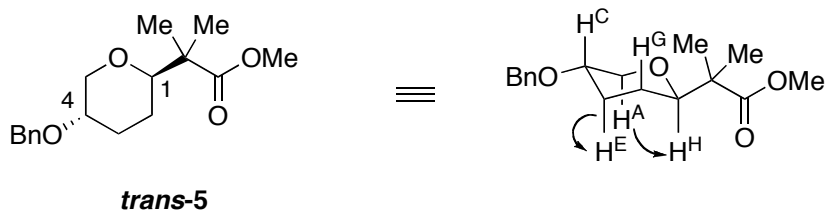

*trans-5*

H<sup>A</sup> irradiated: H<sup>H</sup> (14.0%), H<sup>E</sup> (3.6%)

**Figure S11.** Diagnostic <sup>1</sup>H-<sup>1</sup>H coupling constants for *cis-6*.

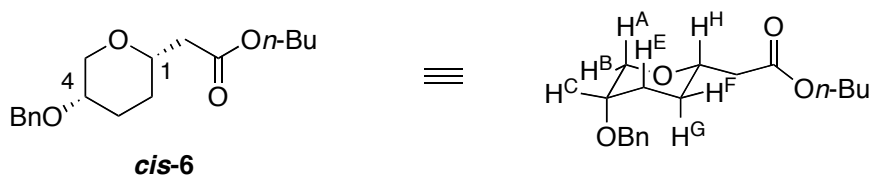

*cis-6*

H<sup>A</sup>: dd,  $J = 12.5$  Hz (gem ax<sup>A</sup>-eq<sup>B</sup>), 1.1 Hz (ax<sup>A</sup>-eq<sup>C</sup>)

H<sup>C</sup>: br s

**Figure S12.** Relevant DPGSE-NOE data (mixing time 2.0 s) for *cis-6*.

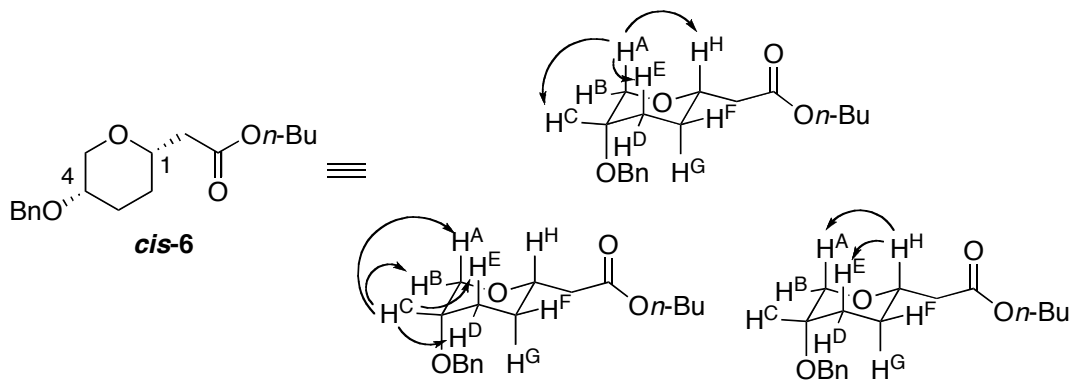

*cis-6*

H<sup>A</sup> irradiated: H<sup>C</sup> (11.8%), H<sup>E</sup> (2.4%), H<sup>H</sup> (13.1%)

H<sup>C</sup> irradiated: H<sup>A</sup> (6.4%), H<sup>B</sup> (3.1%), H<sup>D</sup> (2.0%), H<sup>E</sup> (4.6%)

H<sup>H</sup> irradiated: H<sup>A</sup> (6.5%), H<sup>E</sup> (3.8%)

**Figure S13.** Diagnostic  $^1\text{H}$ - $^1\text{H}$  coupling constants for *trans*-6.

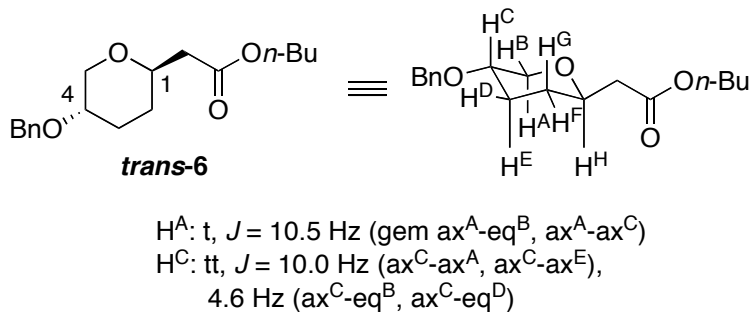

**Figure S14.** Relevant DPGSE-NOE data (mixing time 2.0 s) for *trans*-6.

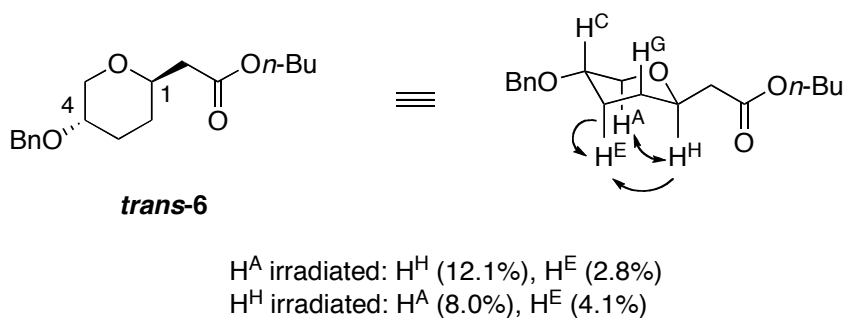

**Figure S15.** Relevant DPGSE-NOE data (mixing time 2.0 s) for *trans*-13 (analysis assumes an equatorial *tert*-butyl group).

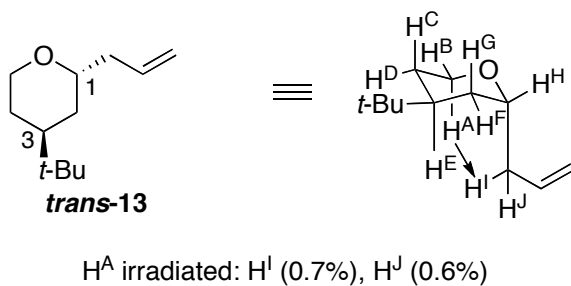

**Figure S16.** Relevant DPGSE-NOE data (mixing time 2.0 s) for *trans*-**14** (analysis assumes an equatorial *tert*-butyl group).

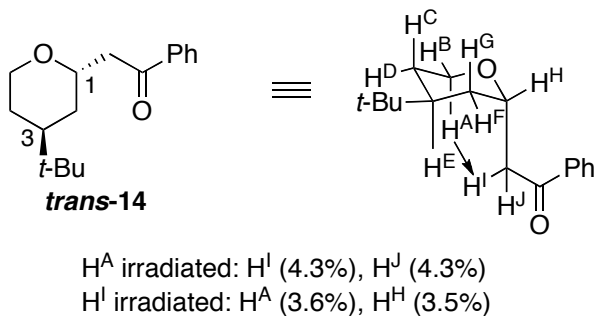

**Figure S17.** Relevant DPGSE-NOE data (mixing time 2.0 s) for *trans*-**15** (analysis assumes an equatorial *tert*-butyl group).

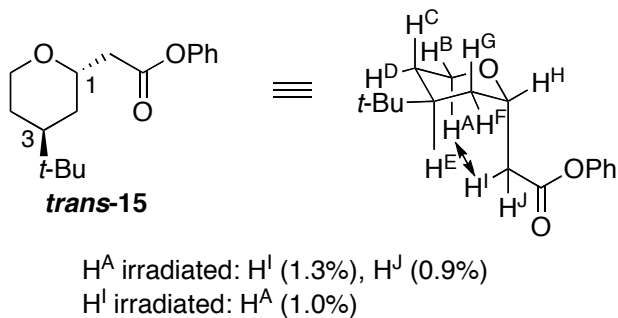

**Figure S18.** Relevant DPGSE-NOE data (mixing time 2.0 s) for *trans*-**16** (analysis assumes an equatorial *tert*-butyl group).

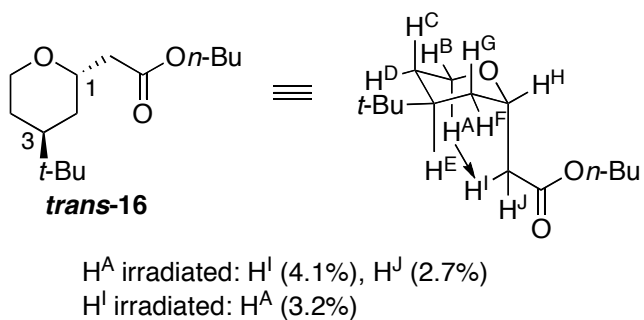

**Figure S19.** Diagnostic  $^1\text{H}$ - $^1\text{H}$  coupling constants for *cis*-**16** (analysis assumes an equatorial *tert*-butyl group).

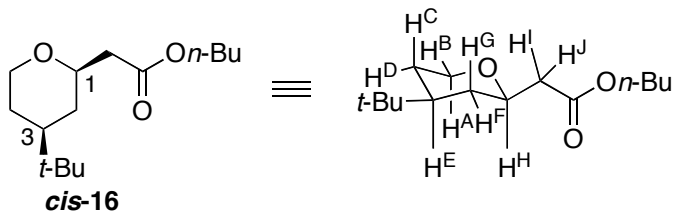

$\text{H}^{\text{H}}$ : dddd,  $J = 10.3$  Hz ( $\text{ax}^{\text{H}}\text{-ax}^{\text{G}}$ ),  $7.4$  Hz ( $\text{ax}^{\text{H}}\text{-H}^{\text{I}}$ ),  
 $5.2$  Hz ( $\text{ax}^{\text{H}}\text{-H}^{\text{J}}$ ),  $1.9$  Hz ( $\text{ax}^{\text{H}}\text{-eq}^{\text{F}}$ )  
 $\text{H}^{\text{I}}$ : dd,  $J = 15.0$  Hz (gem  $\text{H}^{\text{I}}\text{-H}^{\text{J}}$ ),  $7.9$  Hz ( $\text{ax}^{\text{H}}\text{-H}^{\text{I}}$ )  
 $\text{H}^{\text{J}}$ : dd,  $J = 15.0$  Hz (gem  $\text{H}^{\text{I}}\text{-H}^{\text{J}}$ ),  $5.2$  Hz ( $\text{ax}^{\text{H}}\text{-H}^{\text{I}}$ )

**Figure S20.** Relevant DPGSE-NOE data (mixing time 2.0 s) for *cis*-**16** (analysis assumes an equatorial *tert*-butyl group).

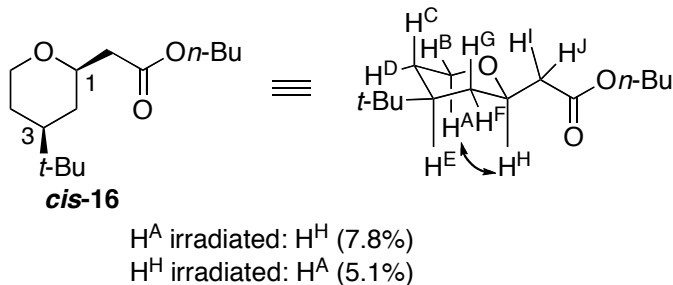

## V. Competition Experiments

**Standard Competition Experiment Conditions.** A solution of acetal (0.20 mmol, 1.0 equiv.) and nucleophiles (1.0 mmol each, 5.0 equiv. each) in anhydrous  $\text{CH}_2\text{Cl}_2$  (2.0 mL) was prepared. An aliquot (0.050 mL) was removed, diluted with  $\text{CDCl}_3$  and analyzed by  $^1\text{H}$  NMR spectroscopy to confirm the molar ratio of the acetal and nucleophiles prior to addition of Lewis acid. Additional quantities of nucleophiles or

acetal were added to adjust the stoichiometry as needed. The reaction mixture was then cooled to  $-78\text{ }^{\circ}\text{C}$ , and Lewis acid (0.32 mmol, 1.6 equiv) was added dropwise. After stirring at  $-78\text{ }^{\circ}\text{C}$  for 5 min, the reaction mixture was warmed to  $-45\text{ }^{\circ}\text{C}$  for 1–2 h before quenching. A saturated aqueous solution of  $\text{NaHCO}_3$  (4.0 mL) was added, and the solution was warmed to  $22\text{ }^{\circ}\text{C}$ , diluted with  $\text{CH}_2\text{Cl}_2$  (2 mL) and  $\text{H}_2\text{O}$  (2 mL), and the layers were separated. The aqueous layer was extracted with  $\text{CH}_2\text{Cl}_2$  (3 x 2 mL) and the combined organic layers were dried over  $\text{Na}_2\text{SO}_4$ , filtered, and concentrated *in vacuo*. Chemoselectivity values were determined by GC after addition of dodecane standard. Chemoselectivity data reported are based on response factor calibration curves generated from authentic samples of pure products with dodecane as internal standards. Diastereoselectivities are reported as uncorrected values.

## VI. Bibliography

- (1) Romero, J. A. C.; Tabacco, S. A.; Woerpel, K. A. *J. Am. Chem. Soc.* 2000, 122, 168-169.
- (2) Bergdahl, M.; Eriksson, M.; Nilsson, M.; Olsson, T. *J. Org. Chem.* 1993, 58, 7238-7244.
- (3) House, H. O.; Czuba, L. J.; Gall, M.; Olmstead, H. D. *J. Org. Chem.* 1969, 34, 2324-2336.
- (4) Colvin, E. W. *Silicon Reagents in Organic Synthesis*; Academic Press Inc.: London, 1988.
- (5) Slougui, N.; Rousseau, G. *Synth. Commun.* 1987, 17, 1-11.
- (6) Collins, D. J.; Jacobs, H. A. *Australian Journal of Chemistry* 1986, 39, 2095-2110.
- (7) Miura, K.; Takeyama, Y.; Oshima, K.; Utimoto, K. *Bull. Chem. Soc. Jpn.* 1991, 64, 1542-1553.
- (8) Pangborn, A. B.; Giardello, M. A.; Grubbs, R. H.; Rosen, R. K.; Timmers, F. J. *Organometallics* 1996, 15, 1518-1520.
- (9) Mayr, H.; Kempf, B.; Ofial, A. R. *Acc. Chem. Res.* 2003, 36, 66-77.
- (10) Compound 3 has been synthesized previously, however the reported analytical data was in error. The correct analytical data is presented here.
- (11) Ayala, L.; Lucero, C. G.; Romero, J. A. C.; Tabacco, S. A.; Woerpel, K. A. *J. Am. Chem. Soc.* 2003, 125, 15521-15528.
- (12) Shenoy, S.; Woerpel, K. A. *Org. Lett.* 2005, 7, 1157-1160.

Jrk-2-1.5 fraction 8 or second batch column after pumping for most of a day

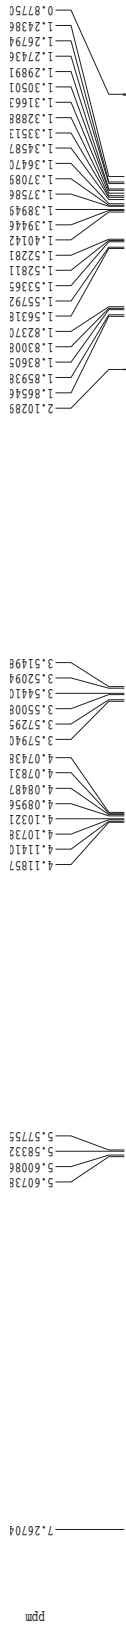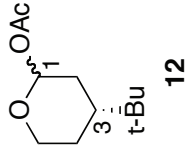

Current Data Parameters  
 USER krump  
 NAME Jrk-2-71  
 EXPNO 5  
 PROCNO 1

F2 - Acquisition Parameters  
 Date\_ 20080807  
 Time 16.01  
 INSTRUM dx400  
 PROBD 5 mm QNP HFE/P  
 PULPROG zgpg30  
 SOLVENT CDCl3  
 NS 8  
 DS 2  
 SWH 6410.256 Hz  
 FIDRES 0.097813 Hz  
 AQ 5.1118579 sec  
 RG 1290.2  
 DW 78.000 usec  
 DE 4.50 usec  
 TE 298.0 K  
 D1 0.10000000 sec  
 ACRESF 0.00000000 sec  
 ACPRK 0.01500000 sec

==== CHANNEL f1 =====  
 NU1 1H  
 P1 12.00 usec  
 PL1 0.00 dB  
 SFO1 400.1328009 MHz

F2 - Processing parameters  
 SI 65536  
 SF 400.1300152 MHz  
 WDW EN  
 SSB 0  
 LB 0.30 Hz  
 GB 2.00  
 PC 2.00

1D NMR plot parameters  
 CX 22.80 cm  
 CY 70.00 cm  
 F1P 7.695 ppm  
 F1 3078.83 Hz  
 F2P 0.020 ppm  
 F2 8.13 Hz  
 PPMON 0.33659 ppm/cm  
 PPMCN 134.67969 Hz/cm

S-24

Integral

ppm



Jrk-2-71 purified C<sub>3</sub>-tBu acetate  
 13C spectrum with 1H decoupling

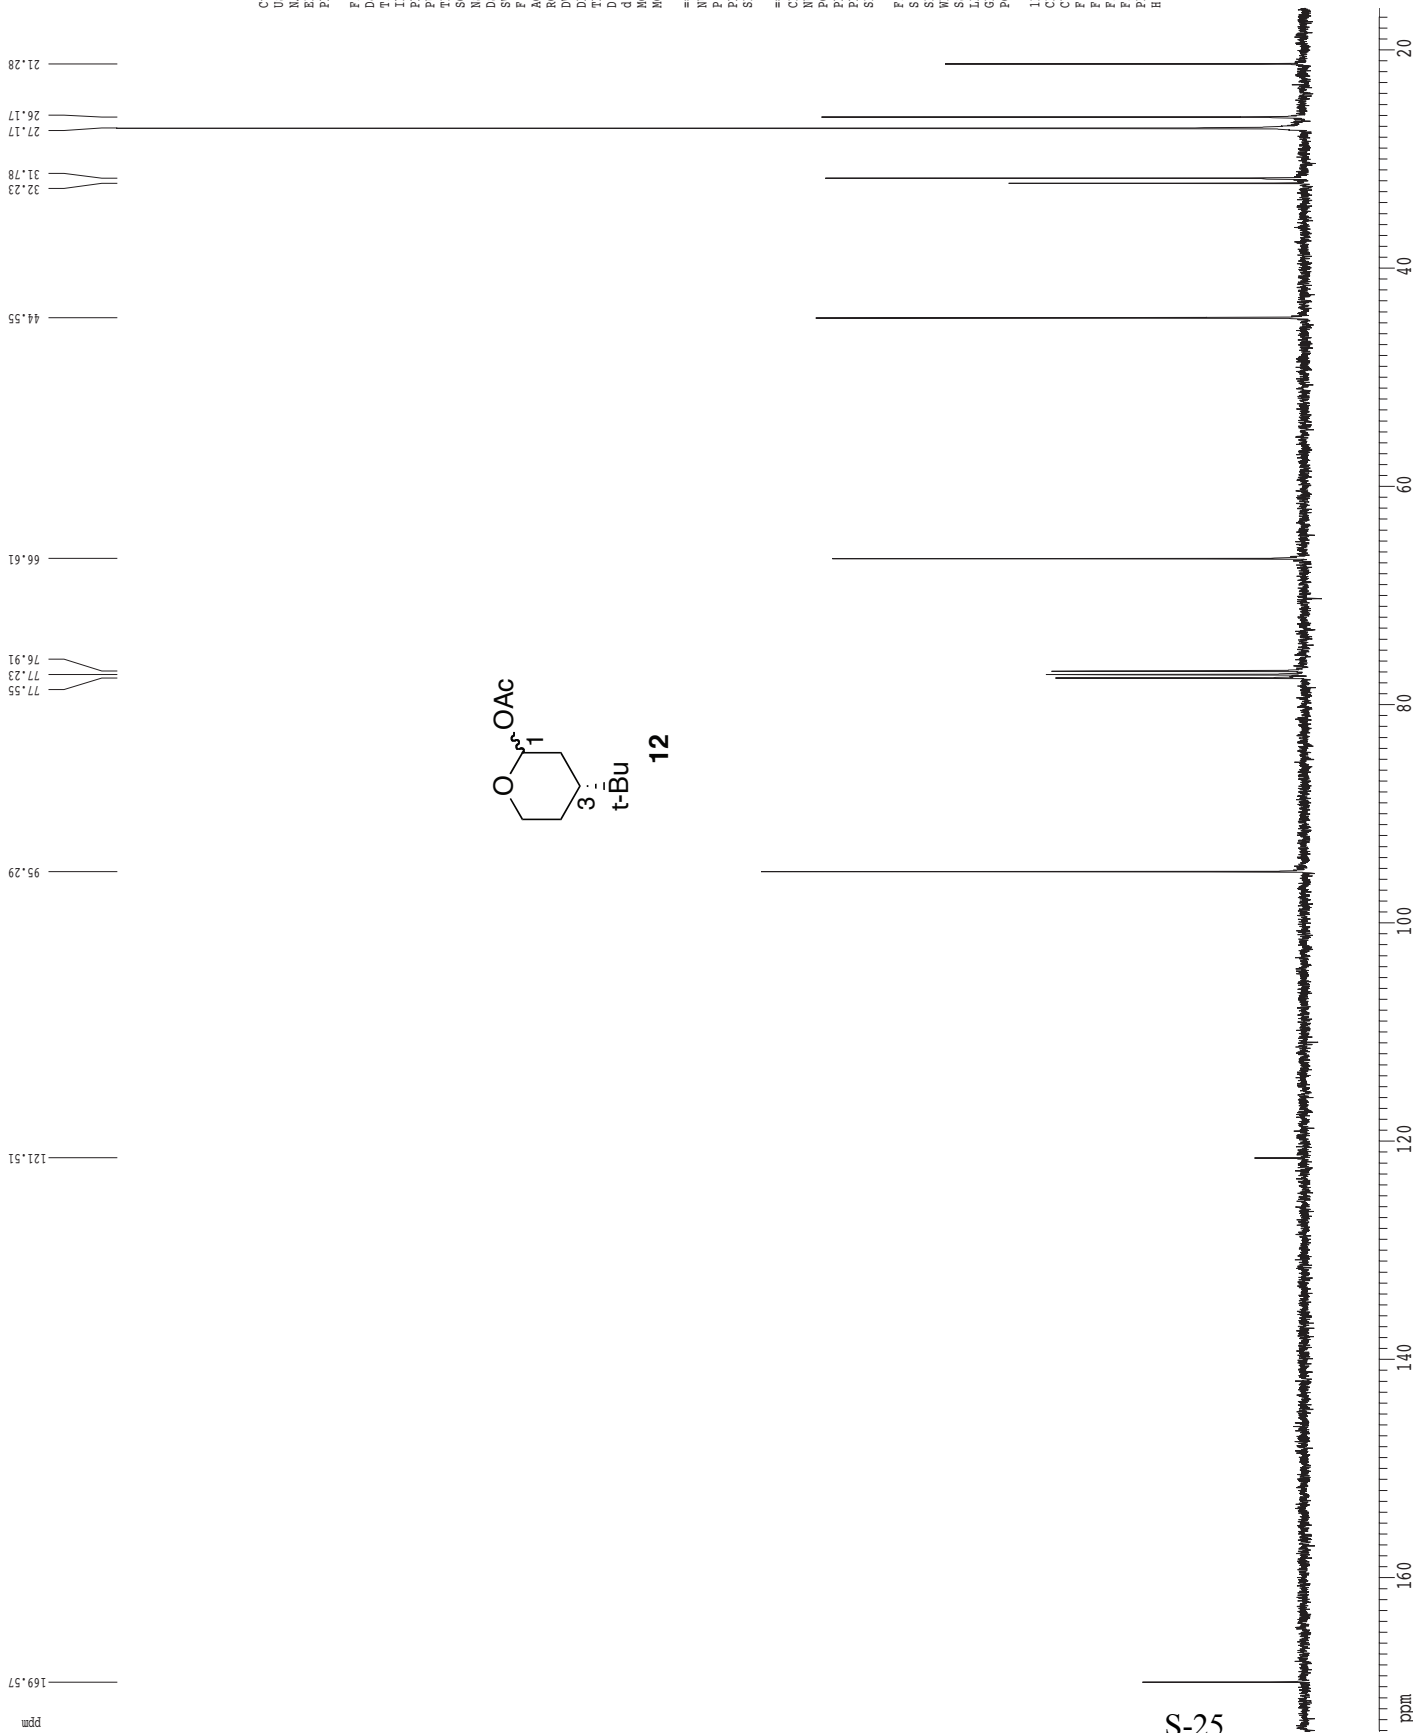

```

Current Data Parameters
USER      krump
NAME      jrk-2-71
EXPNO     14
PROCNO    1

F2 - Acquisition Parameters
Date_     20080820
Time      10.26
INSTRUM   dx400
PROBHD    5 mm QNP H/F/P
PULPROG   zgpg30
TD         65536
SOLVENT   CDCl3
NS         122
DS         4
SWH        24154.50 Hz
FIDRES     0.1368570 Hz
AQ         1.3566452 sec
RG         9195.2
DW         20.700 usec
DE         20.39 usec
TE         298.0 K
D1         0.10000000 sec
d11        0.03000000 sec
MCREST     0.00000000 sec
MORPK      0.01500000 sec

===== CHANNEL f1 =====
NUC1       13C
P1         10.30 usec
PL1        0.00 dB
SFO1       100.627964 MHz

===== CHANNEL f2 =====
CPDPRG2    mlev16
NUC2       1H
P2         90.00 usec
PL2        0.00 dB
PL12       17.70 dB
SFO2       400.1328009 MHz

F2 - Processing parameters
SI         65536
SF         100.6127576 MHz
WDW        EM
SSB        0
LB         1.00 Hz
GB         0
PC         1.00

1D NMR plot parameters
XZ        22.80 cm
Y1         174.107 ppm
Y2         175.1735 Hz
F1         16.177 ppm
F2         1627.57 Hz
PRNCHN    6.92675 ppm/cm
HZCN      696.91992 Hz/cm
  
```

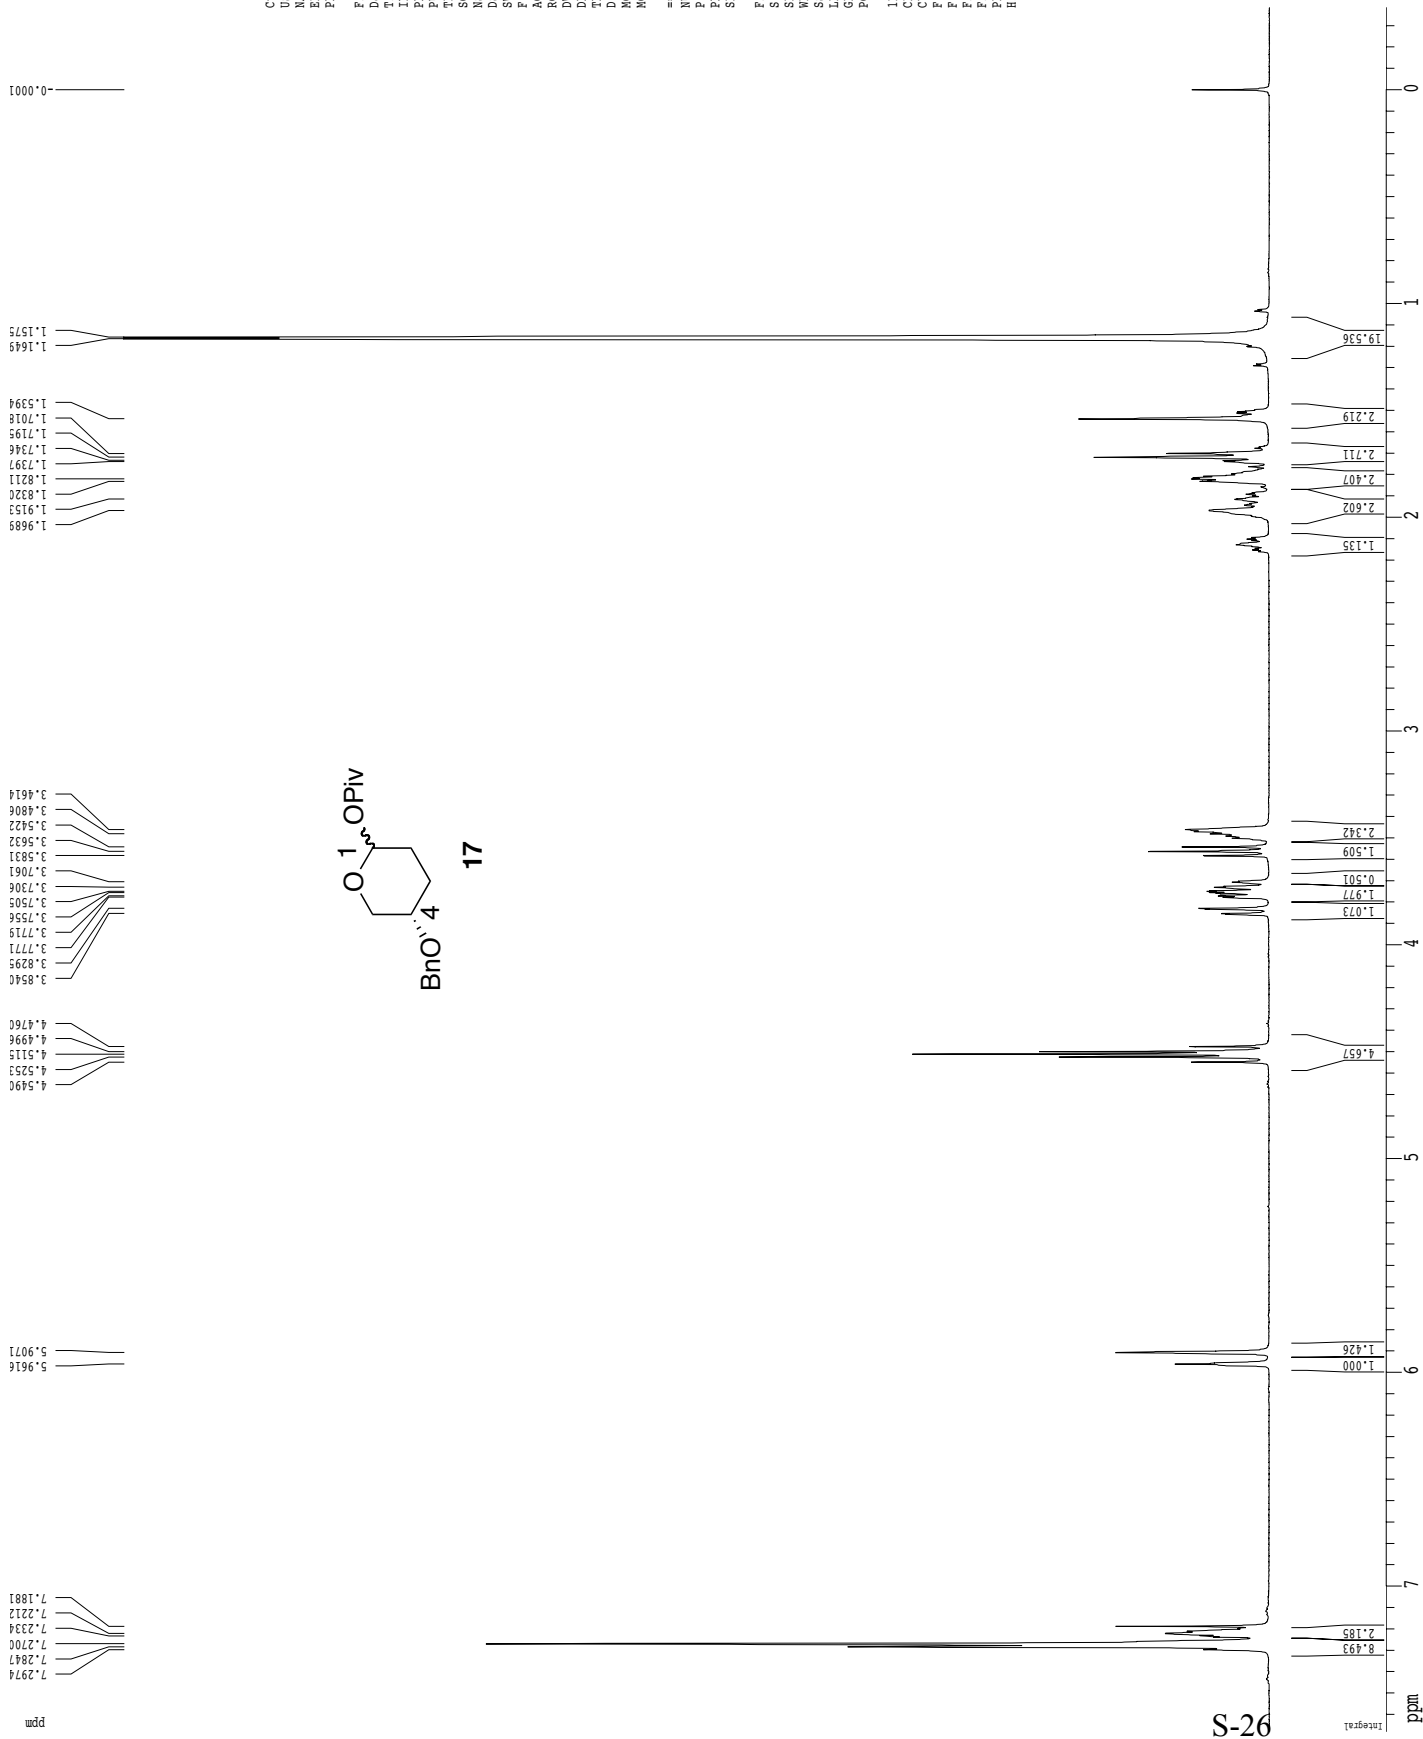

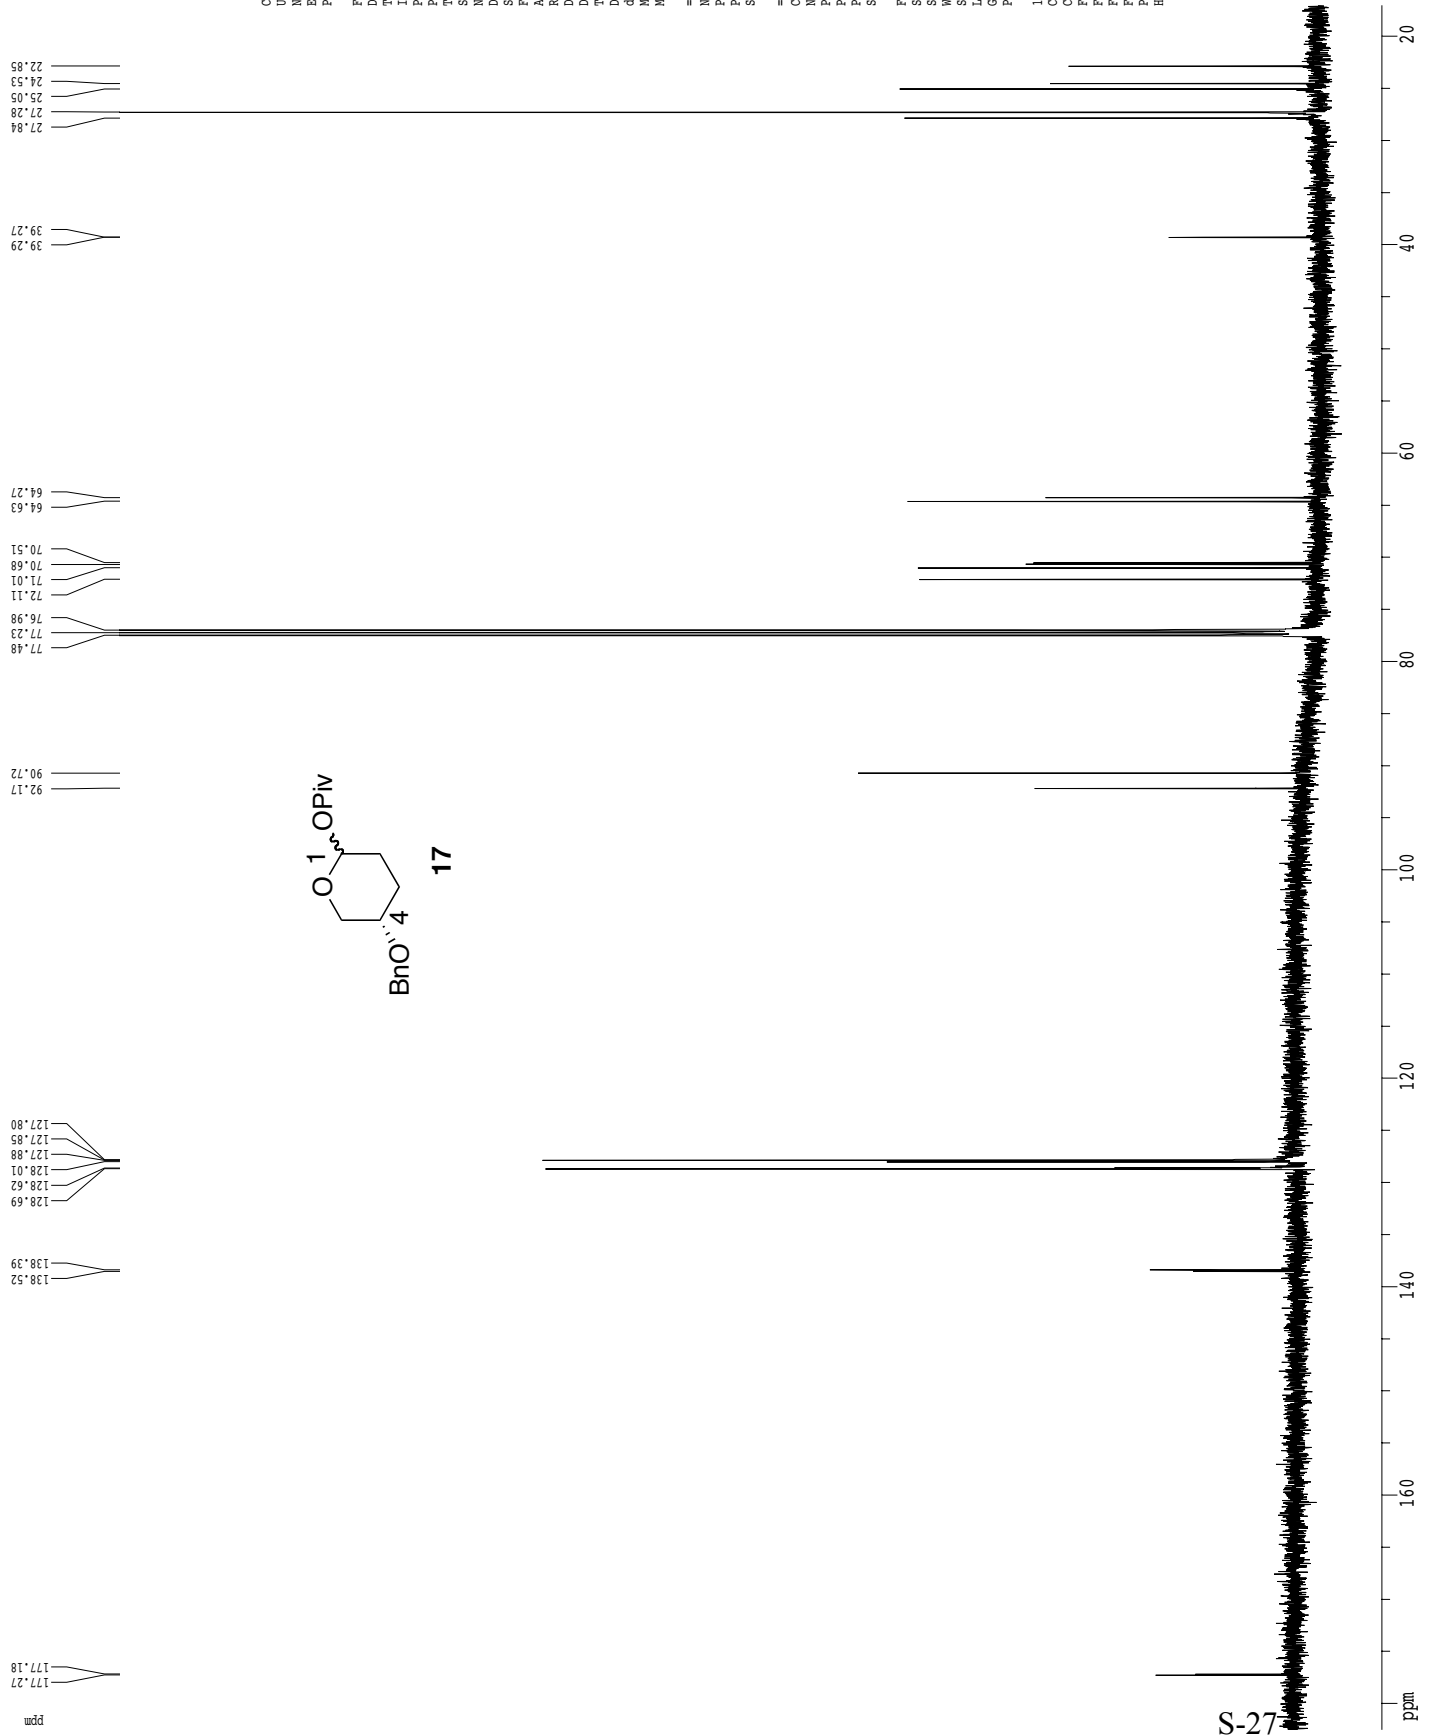

Current Data Parameters  
 USER krumpe  
 NAME Jrk-2-54  
 EXPNO 114  
 PROCNO 1

F2 - Acquisition Parameters  
 Date\_ 20080429  
 Time 16.06  
 INSTRUM cryo500  
 PROBD 5 mm CPTCI LH-  
 PULPROG zgpg30  
 TD 6536  
 SOLVENT CDCl3  
 DS 114  
 SFO1 125.7604011 MHz  
 SF 125.7604011 MHz  
 FIDRES 0.462388 Hz  
 AQ 1.0813940 sec  
 RG 13004  
 DW 16.500 usec  
 DE 6.00 usec  
 TE 298.0 K  
 D1 0.25000000 sec  
 d11 0.03000000 sec  
 MCREST 0.00000000 sec  
 MCHRG 0.01500000 sec

==== CHANNEL f1 =====  
 NUC1 13C  
 P1 15.00 usec  
 PL1 23.00 dB  
 SFO1 125.7604011 MHz

==== CHANNEL f2 =====  
 CPDPRG2 wahtz16  
 NUC2 1H  
 PCPD2 100.00 usec  
 PL2 1.60 dB  
 PL12 23.54 dB  
 SFO2 500.225011 MHz

F2 - Processing parameters  
 SI 65536  
 SF 125.7604011 MHz  
 WDW EN  
 SSB 0  
 LB 1.00 Hz  
 GB 0  
 PC 2.00

1D NMR plot parameters  
 CX 22.80 cm  
 CY 35.00 cm  
 FIP 182.472 ppm  
 F1 22951.37 Hz  
 F2P 17.072 ppm  
 F2 2147.31 Hz  
 PPMCH 7.25438 ppm/cm  
 HZCH 912.45911 Hz/cm

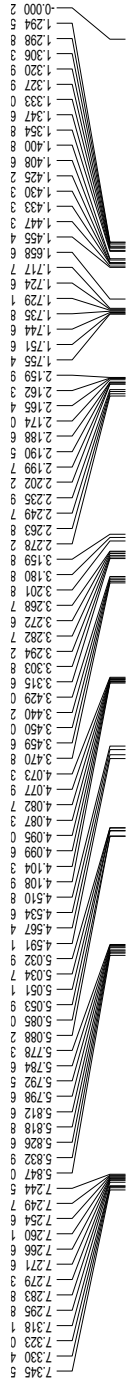

Current Data Parameters  
 USER walter  
 NAME WAS-III-177-23  
 EXPNO 1  
 PROCNO 1  
 F2-Acquisition Parameters  
 Date\_ 20071030  
 Time 17:58  
 INSTRUM cryo500  
 PROBHD 5 mm CPTCI-1H-  
 PULPROG zg30  
 TD 81728  
 SOLVENT CDCl3T  
 NS 1  
 DS 0  
 SVH 8072.820 Hz  
 FIDRES 0.086043 Hz  
 AQ 5.0993986 sec  
 SFO1 500.136099 MHz  
 DQ 62.400 usec  
 DE 288.0 K  
 TE 6.00 usec  
 D1 0.10000000 sec  
 MCREST 0.00000000 sec  
 MCVRK 0.01500000 sec  
 ===== CHANNEL f1 =====  
 NUC1 1H  
 P1 8.00 usec  
 PL1 1.80 dB  
 SFO1 500.2250015 MHz  
 F2-Processing parameters  
 SI 32768  
 SF 500.220386 MHz  
 SSF 65.535 usec  
 WDW EM  
 EN 0  
 SSB 0  
 LB 0.30 Hz  
 GB 0  
 PC 4.00  
 1D NMR plot parameters  
 CX 22.80 cm  
 CY 15.00 cm  
 FIP 10.500 ppm  
 F2P 9262.31 Hz  
 F3P 9.000 ppm  
 F2 -250.11 Hz  
 PPMCM 0.48246 ppm/cm  
 HZCM 241.33423 Hz/cm

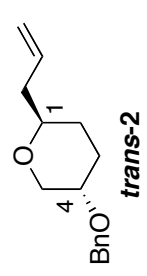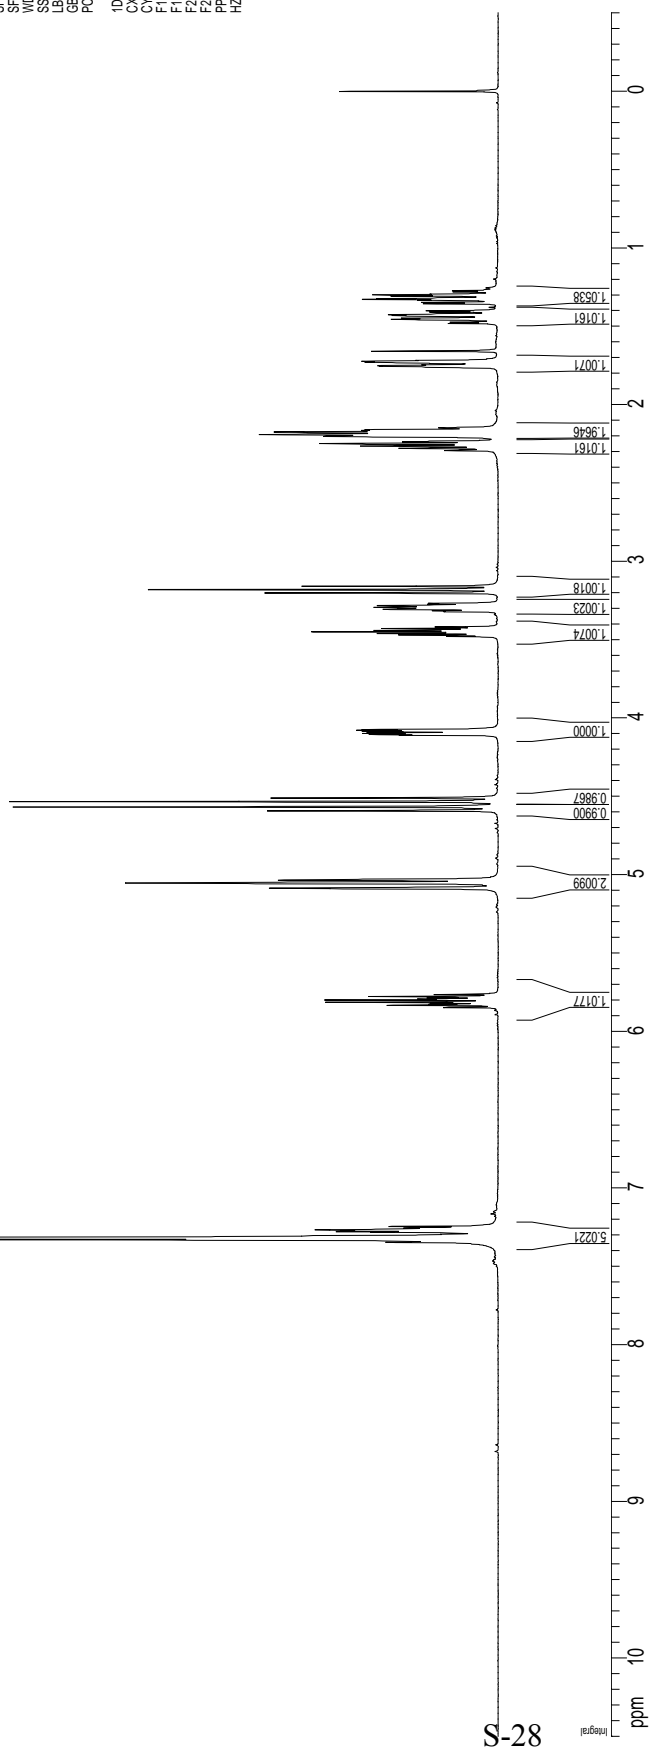

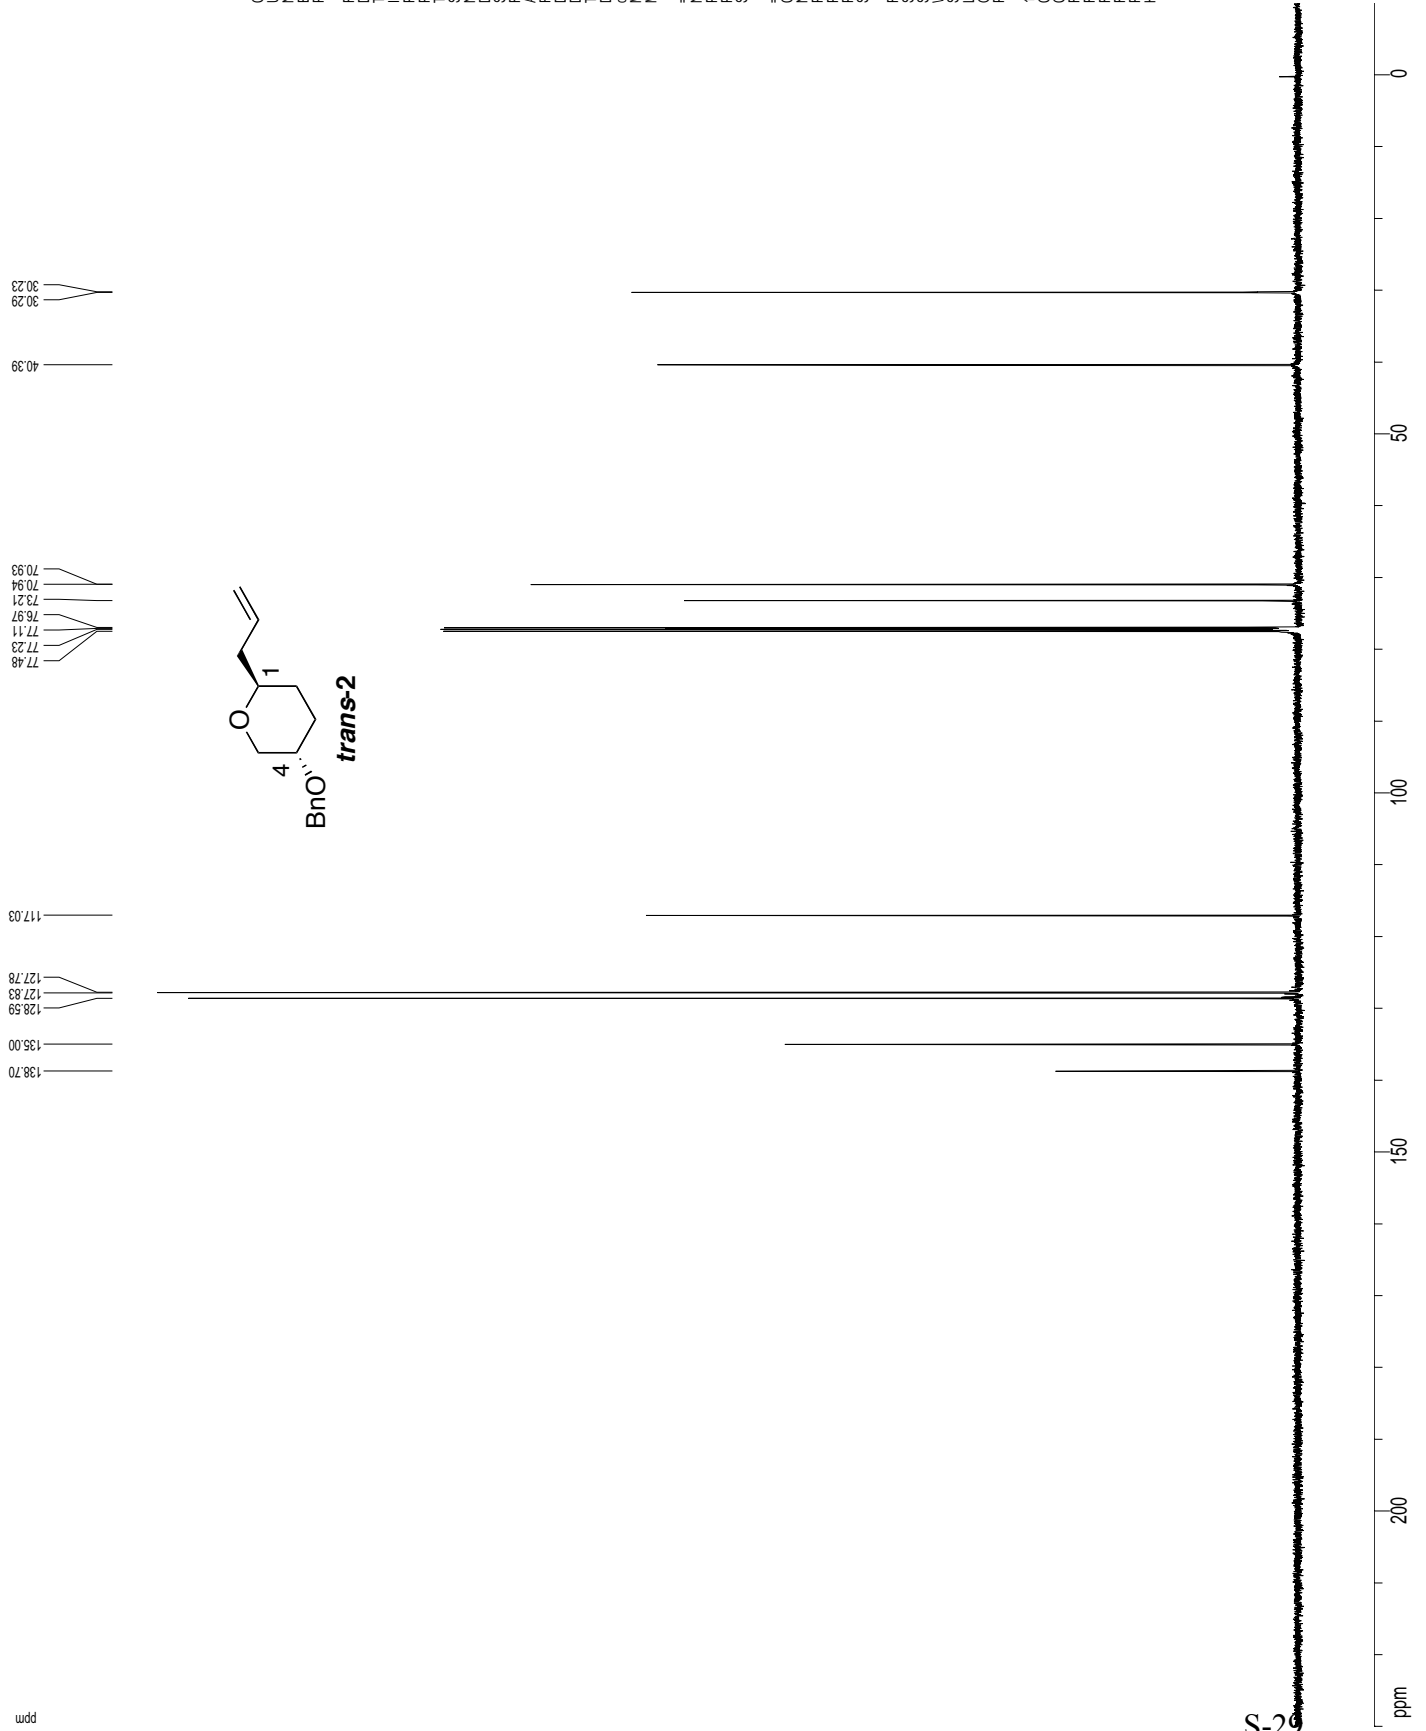

Current Data Parameters  
USER walter  
NAME WAS-III-177-23  
EXPNO 3  
PROCNO 1

F2 - Acquisition Parameters  
Date\_ 20071030  
Time 18.01  
INSTRUM cryo500  
PROBHD 5 mm CPTC 1H-  
PULPROG zgpg30  
TD 65472  
SOLVENT CDCl3  
NS 65  
DS 4  
SWH 30303.031 Hz  
FIDRES 0.463222 Hz  
AQ 1.0794635 sec  
RG 8192  
DW 16.500 usec  
DE 6.00 usec  
TE 288.0 K  
D1 0.25000000 sec  
d11 0.03000000 sec  
MCREST 0.00000000 sec  
MCWRK 0.01500000 sec

==== CHANNEL f1 =====  
NUC1 13C  
P1 15.00 usec  
PL1 -1.00 dB  
SFO1 125.760462 MHz

==== CHANNEL f2 =====  
CPDPRG2 waltz16  
NUC2 1H  
PCPD2 100.00 usec  
PL2 1.60 dB  
PL12 23.54 dB  
SFO2 500.225011 MHz

F2 - Processing parameters  
SI 65536  
SF 125.760462 MHz  
WDW EM  
SSB 0  
GB 1.00 Hz  
CB 2.00  
PC

1D NMR parameters  
CX 22.80 cm  
CY 15.65 cm  
F1P 230.000 ppm  
F1 28929.49 Hz  
F2P -10.000 ppm  
F2 -1257.80 Hz  
PPH1CM 10.52632 ppm/cm  
HZCM 1324.00427 Hz/cm

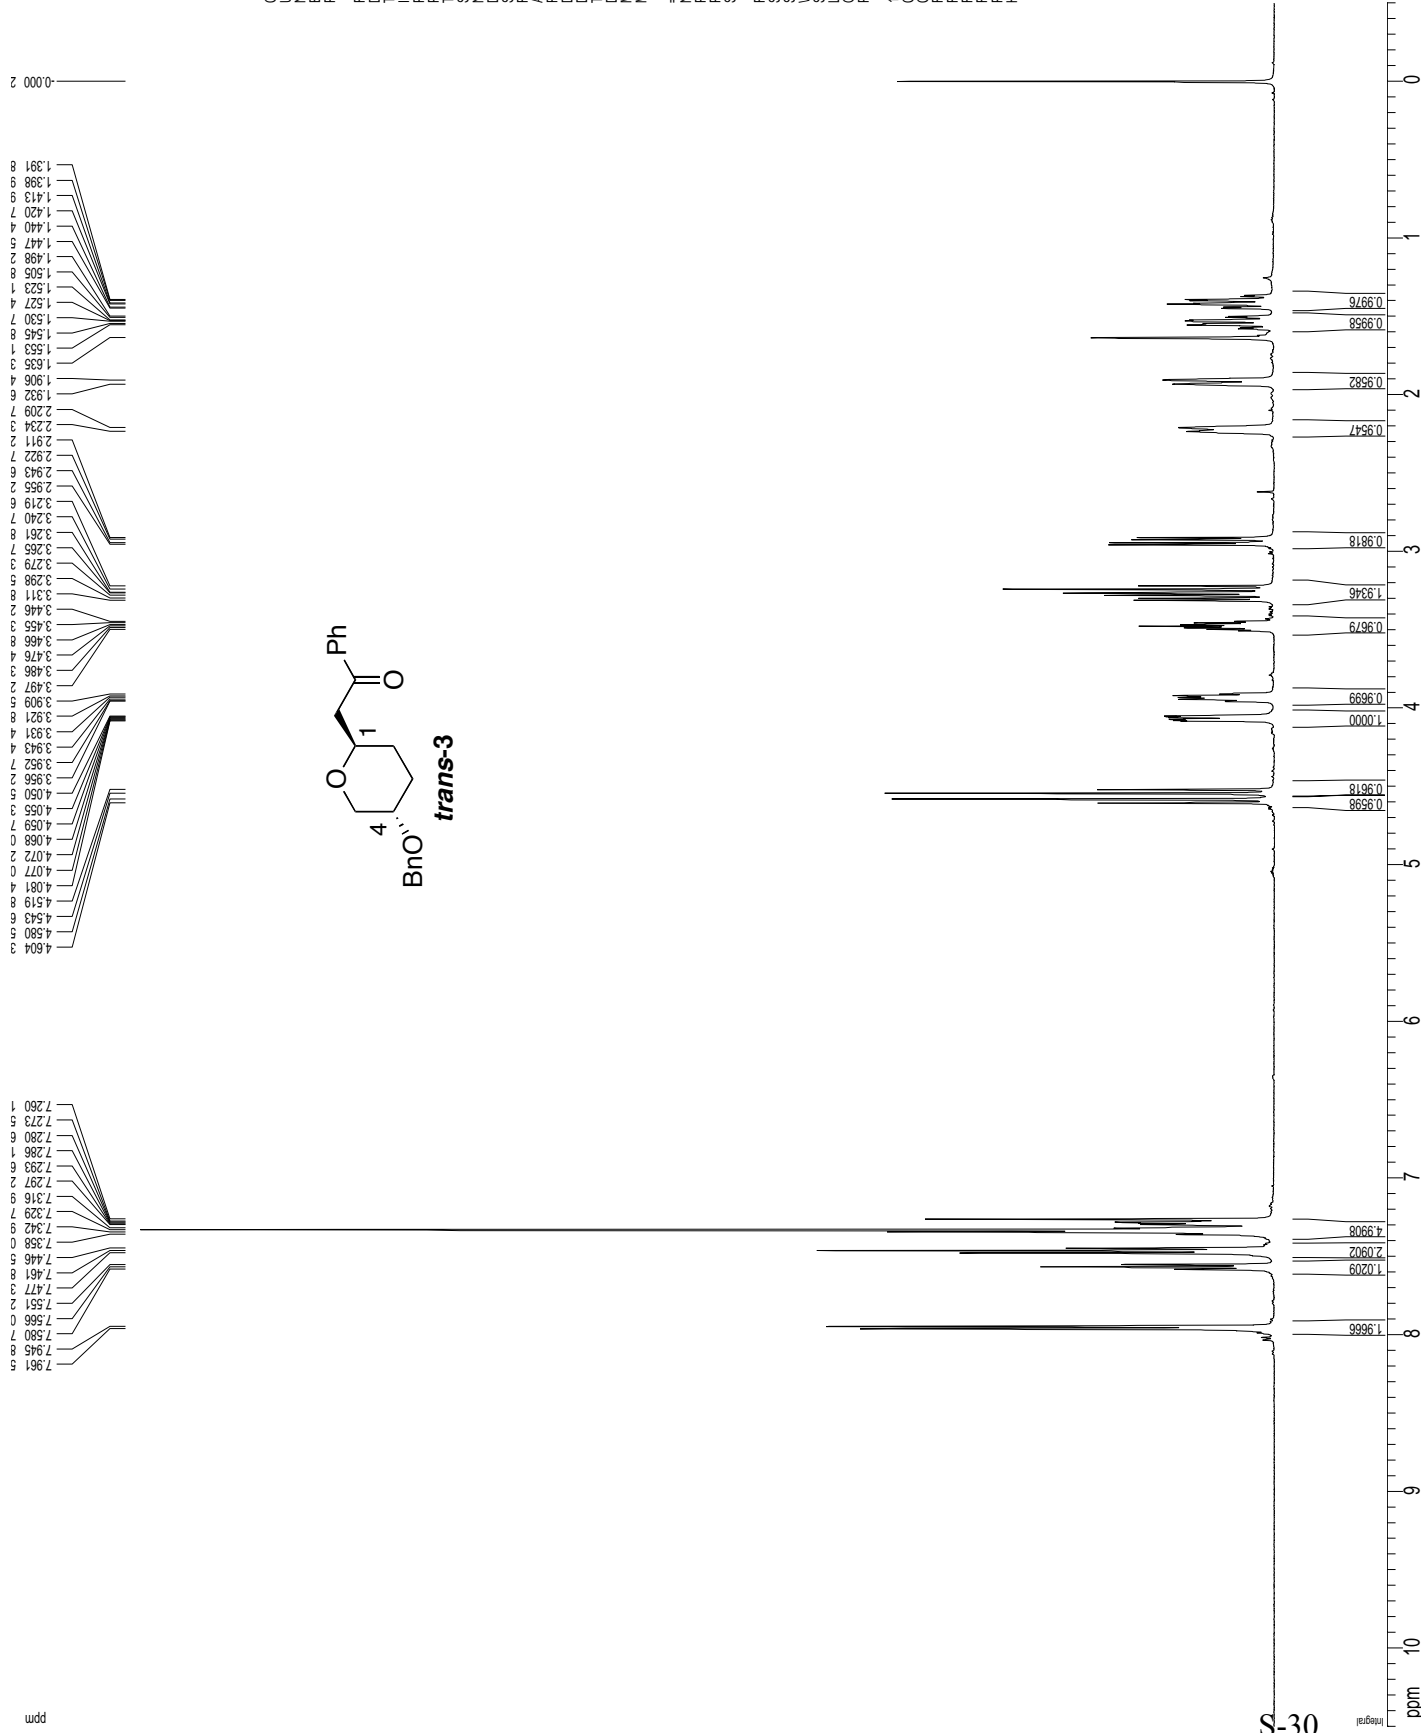

Current Data Parameters  
 USER walter  
 NAME WAS-III-31-25  
 EXPNO 31  
 PROCNO 1  
 F2-Acquisition Parameters  
 Date\_ 20070221  
 Time 9:45  
 INSTRUM cry500  
 PROBHD 5 mm CPTCI-1H  
 PULPROG zg30  
 TD 81728  
 SOLVENT CDCl3T  
 NS 8  
 DS 0  
 SWH 8072.820 Hz  
 FIDRES 0.058043 Hz  
 AQC 5.0899774 sec  
 RG 4.5  
 DW 6.400 usec  
 DE 6.000 usec  
 TE 290.1 K  
 D1 0.10000000 sec  
 MCREST 0.00000000 sec  
 MCVRK 0.01500000 sec  
 ===== CHANNEL f1 =====  
 NUC1 1H  
 P1 8.00 usec  
 PL1 1.60 dB  
 SFO1 500.2250015 MHz  
 F2-Processing parameters  
 SI 32768  
 SF 500.220319 MHz  
 SD 6500 Hz  
 WDW EM  
 EN 0  
 LB 0.30 Hz  
 GB 0  
 PC 4.00  
 1D NMR plot parameters  
 CX 22.80 cm  
 CY 15.00 cm  
 F1P 10.500 ppm  
 F2P 5252.31 Hz  
 F3P 0.000 ppm  
 F2 -250.11 Hz  
 PPMCM 0.48246 ppm/cm  
 HZCM 241.33423 Hz/cm

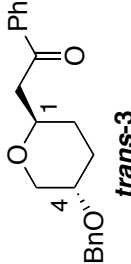

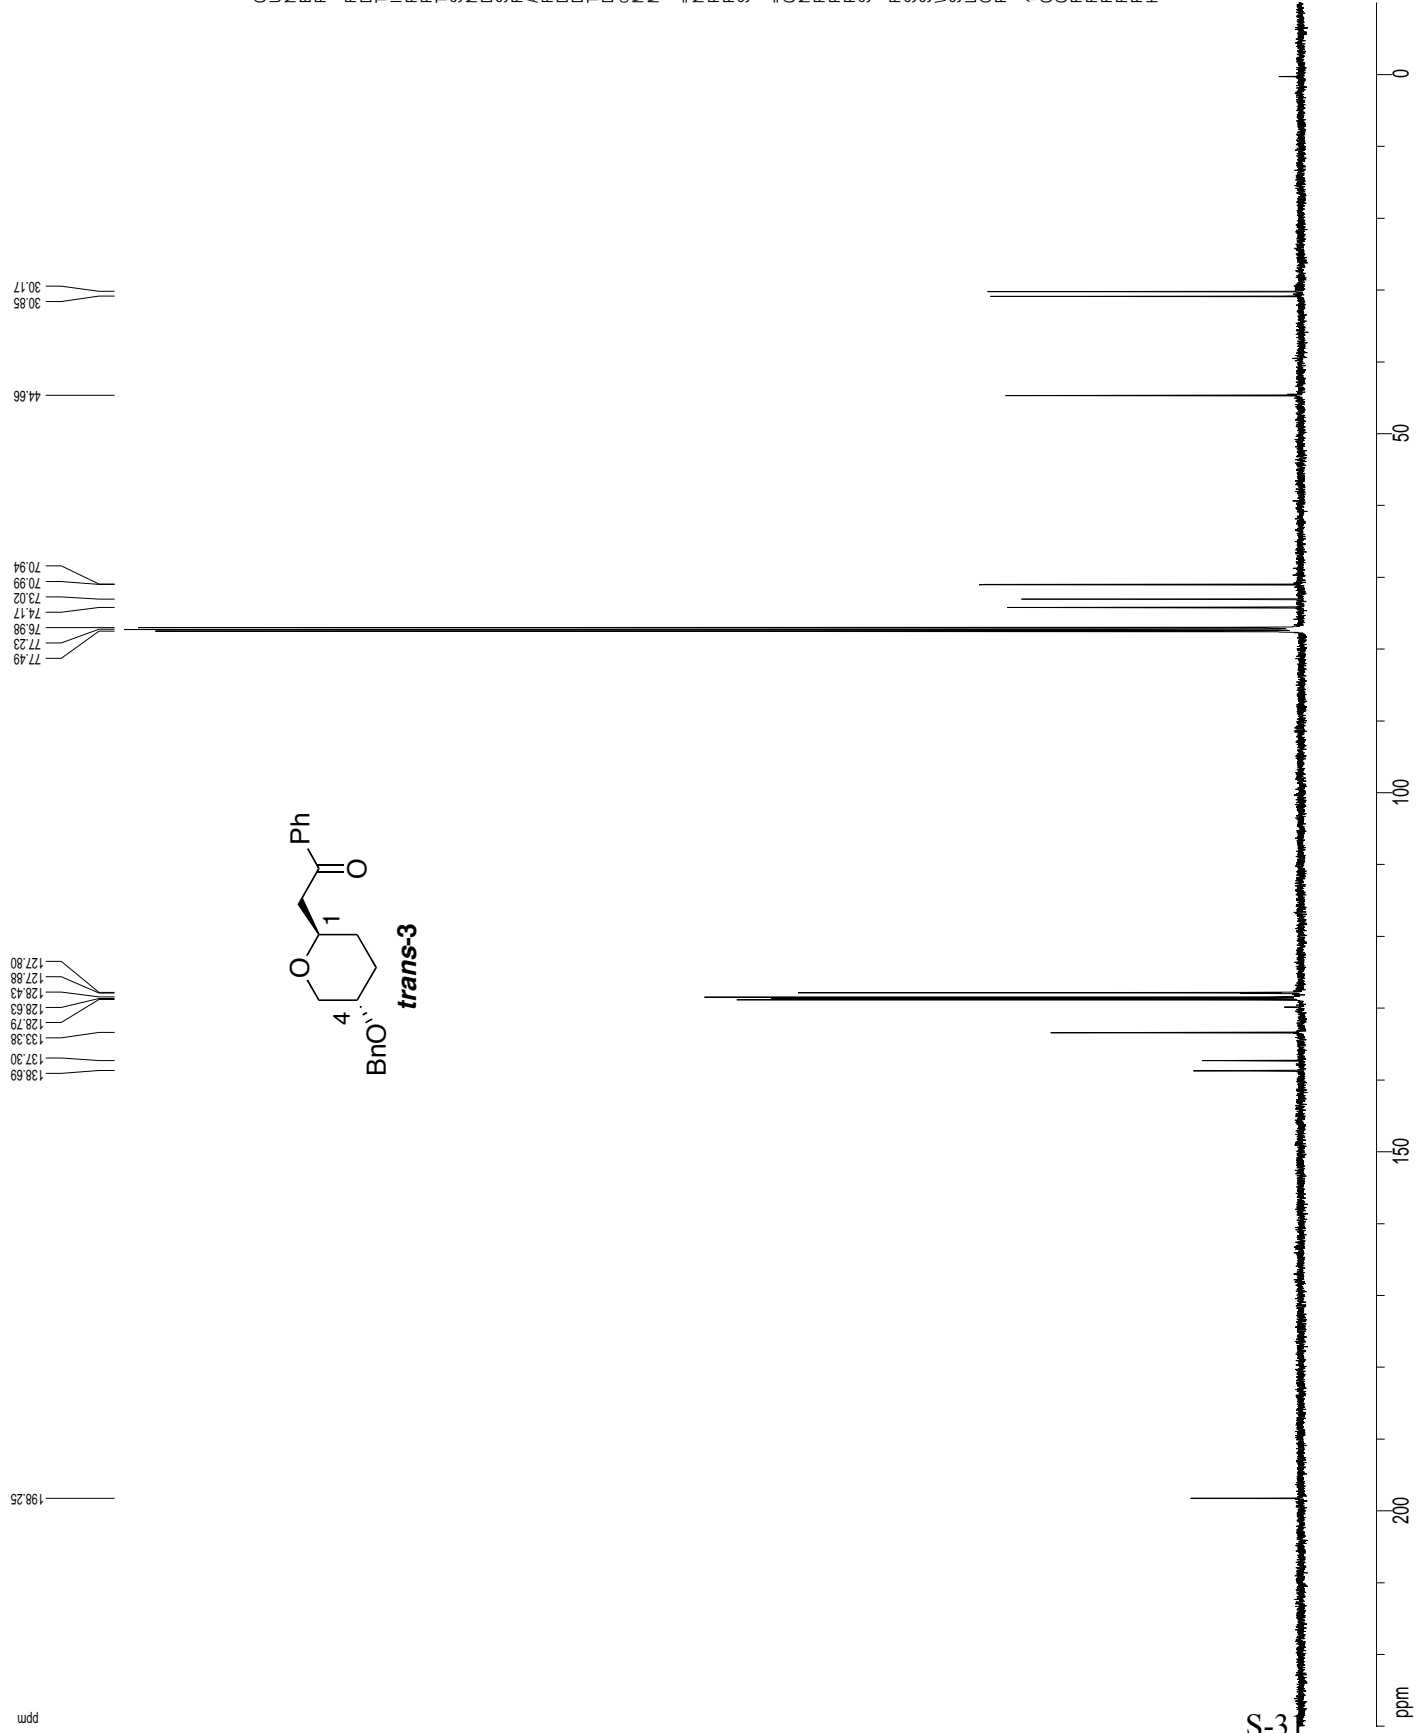

Current Data Parameters  
 USER: walter  
 NAME: WAS-III-31-25  
 EXPNO: 33  
 PROCNO: 1

F2 - Acquisition Parameters  
 Date\_: 20070621  
 Time: 9:53  
 INSTRUM: cryo500  
 PULPROG: zgpg30  
 TD: 65472  
 SOLVENT: CDCl3  
 NS: 225  
 DS: 4  
 SWH: 30303.031 Hz  
 FIDRES: 0.463222 Hz  
 AQ: 1.0794470 sec  
 RG: 11585.2  
 DW: 16.500 usec  
 DE: 6.00 usec  
 TE: 288.0 K  
 d1: 0.25000000 sec  
 d11: 0.03000000 sec  
 MCREST: 0.00000000 sec  
 MCWRR: 0.01500000 sec

==== CHANNEL f1 =====  
 NUC1: <sup>13</sup>C  
 P1: 15.00 usec  
 PL1: -1.00 dB  
 SFO1: 125.762548 MHz

==== CHANNEL f2 =====  
 CPDPRG2: waltz16  
 NUC2: <sup>1</sup>H  
 PCPD2: 100.00 usec  
 PL2: 1.60 dB  
 PL12: 23.54 dB  
 SFO2: 500.225011 MHz

F2 - Processing parameters  
 SI: 65536  
 SF: 125.7604015 MHz  
 WDW: EM  
 SSB: 0  
 GB: 1.00 Hz  
 GC: 0  
 PC: 2.00

1D NMR parameters  
 CX: 22.80 cm  
 CY: 15.65 cm  
 F1P: 230.000 ppm  
 F1: 28929.49 Hz  
 F2P: -10.000 ppm  
 F2: -1257.80 Hz  
 PPMICM: 10.52632 ppm/cm  
 HZCM: 1324.00427 Hz/cm

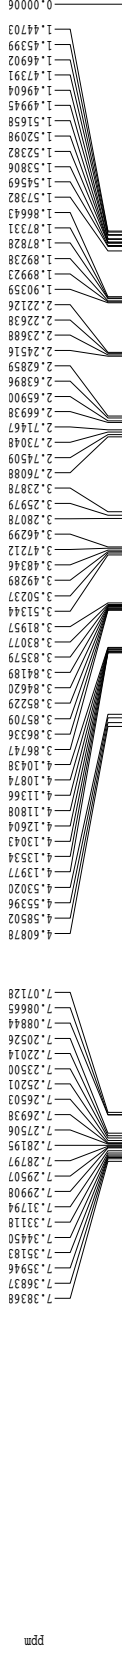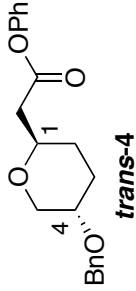

Current Data Parameters  
USER: walter  
NAME: WAS-III-154-28  
EXPNO: 3  
PROCNO: 1

F2 - Acquisition Parameters  
Date\_ : 20080403  
Time : 23.43  
INSTRUM: cryso00  
PROBHD: 5 mm CPXI 1H-  
PULPROG: zg30  
TD: 81728  
SOLVENT: CDCl3T  
NS: 8  
DS: 0  
SWH: 8012.920 Hz  
FIDRES: 0.090043 Hz  
AQ: 5.099999 sec  
RG: 3  
SFO1: 500.136099 MHz  
WDW: EM  
SSB: 0  
LB: 0.30 Hz  
GB: 0  
PC: 4.00

1D NMR plot parameters  
CX: 22.80 cm  
CY: 15.00 cm  
FLP: 10.500 ppm  
F1: 52.8231 Hz  
F2: -2.0311 ppm  
FPCW: 0.88246 ppm/cm  
HZCN: 241.33823 Hz/cm

==== CHANNEL f1 =====  
NUC1: 1H  
P1: 8.00 usec  
PL1: 1.60 dB  
SFO1: 500.225015 MHz

F2 - Processing parameters  
SI: 32768  
SF: 500.220351 MHz  
WDW: EM  
SSB: 0  
LB: 0.30 Hz  
GB: 0  
PC: 4.00

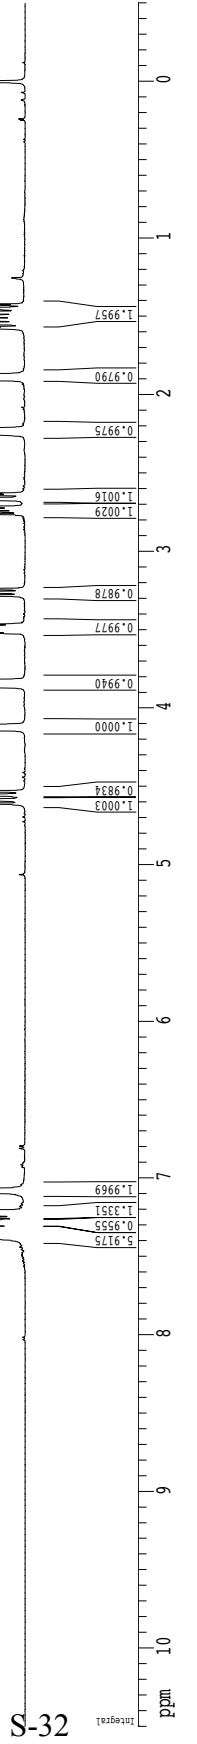



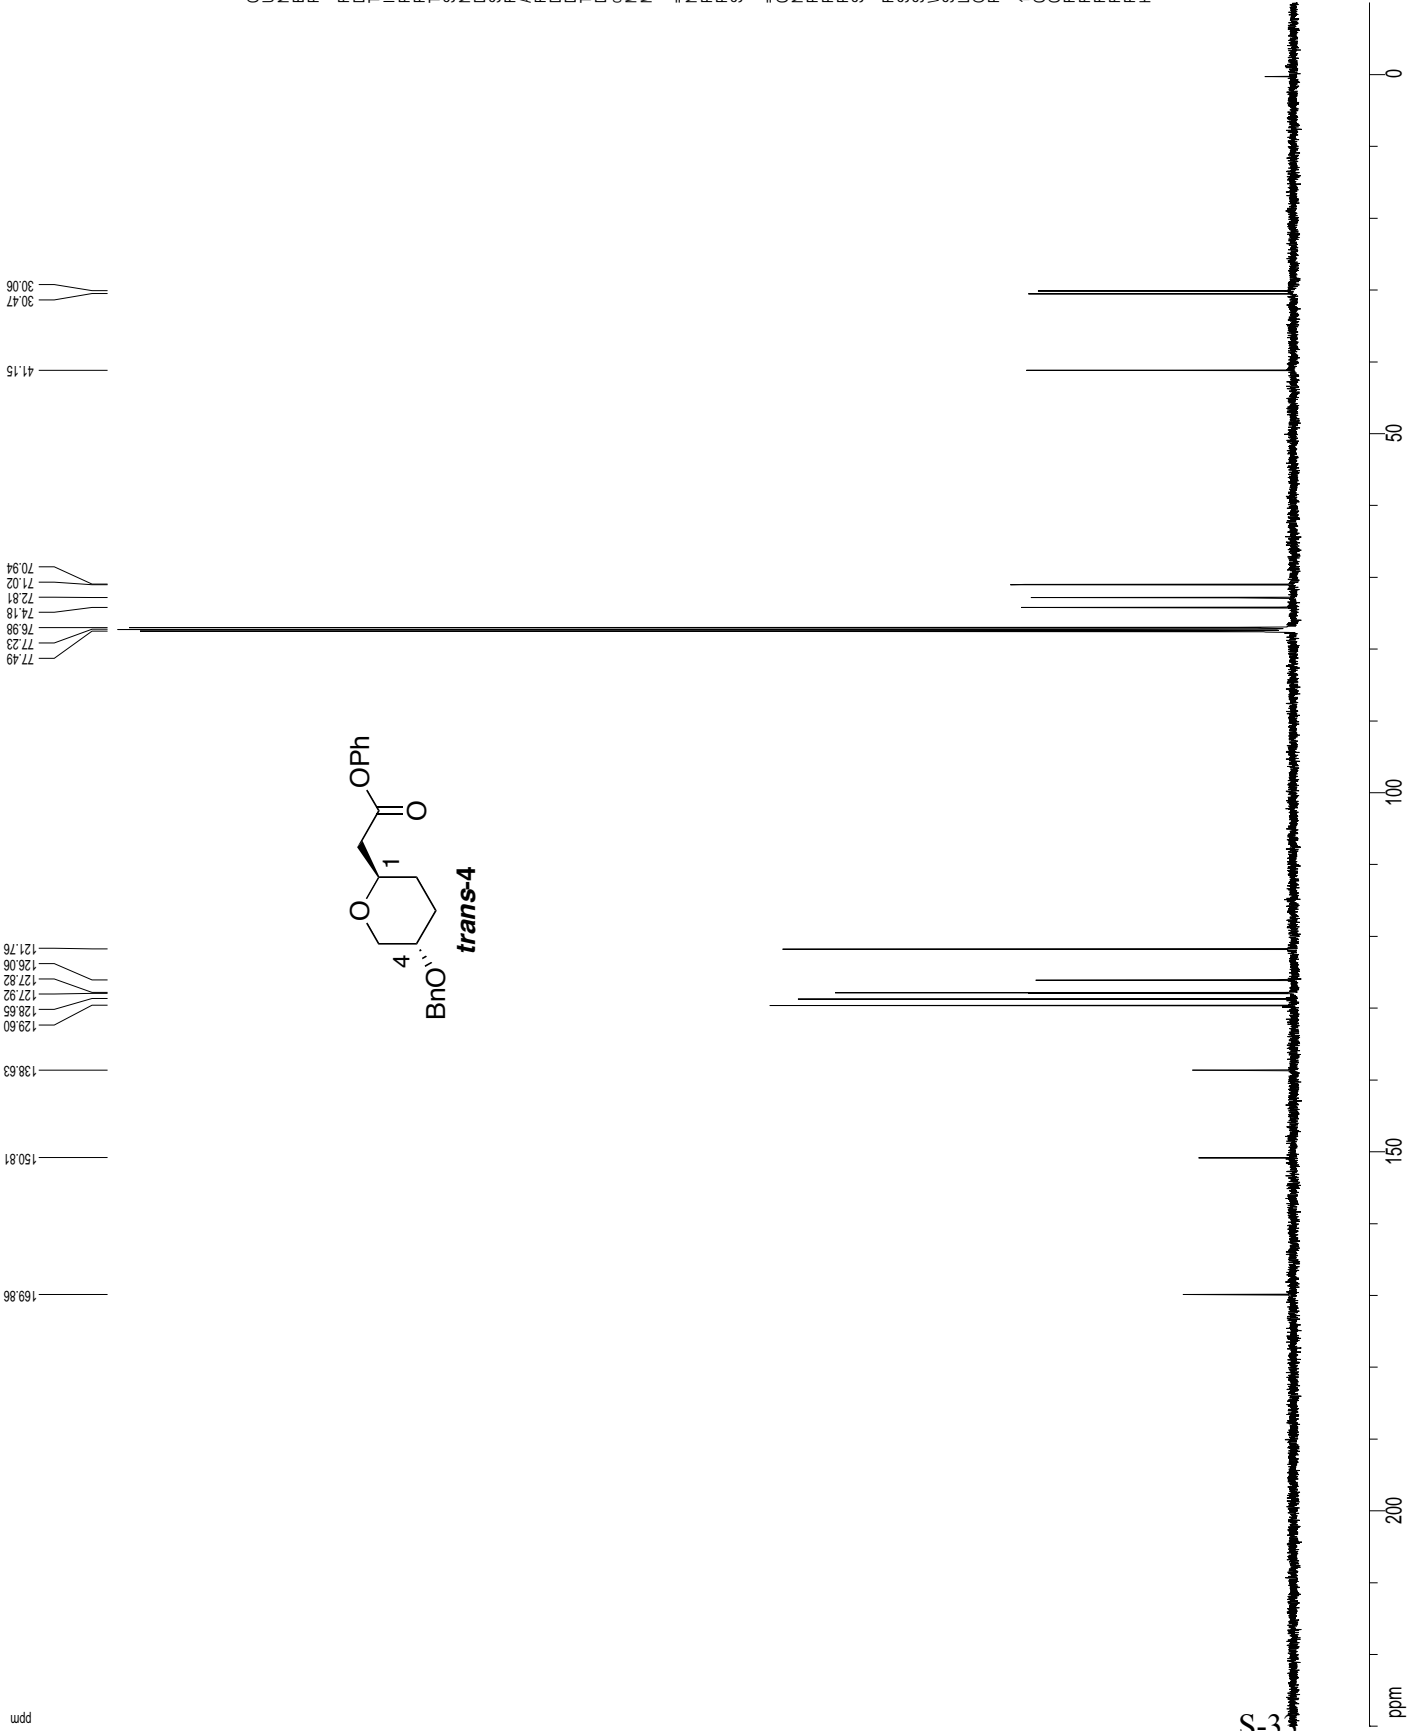

Current Data Parameters  
 USER walter  
 NAME WAS-III-154-28  
 EXPNO 2  
 PROCNO 1

F2 - Acquisition Parameters  
 Date\_ 20071002  
 Time 16.37  
 INSTRUM cryo500  
 PULPROG zgpg30  
 TD 65472  
 SOLVENT CDCl3  
 NS 112  
 DS 0  
 SWH 30303.031 Hz  
 FIDRES 0.463222 Hz  
 AQ 1.0794635 sec  
 RG 10321.3  
 DW 16.500 usec  
 DE 6.00 usec  
 TE 288.0 K  
 D1 0.25000000 sec  
 d11 0.03000000 sec  
 MCREST 0.00000000 sec  
 MCWRR 0.01500000 sec

==== CHANNEL f1 =====  
 NUC1 13C  
 P1 15.00 usec  
 PL1 -1.00 dB  
 SFO1 125.762548 MHz

==== CHANNEL f2 =====  
 CPDPRG2 waltz16  
 NUC2 1H  
 PCPD2 100.00 usec  
 PL2 1.60 dB  
 PL12 23.54 dB  
 SFO2 500.225011 MHz

F2 - Processing parameters  
 SI 65536  
 SF 125.7604015 MHz  
 WDW EM  
 SSB 0  
 GB 1.00 Hz  
 PC 2.00

1D NMR parameters  
 CX 22.80 cm  
 CY 15.65 cm  
 F1 230.000 ppm  
 F2 28929.49 Hz  
 F2P -10.000 ppm  
 F2 -1257.80 Hz  
 PPM1CM 10.52632 ppm/cm  
 HZCM 1324.00427 Hz/cm

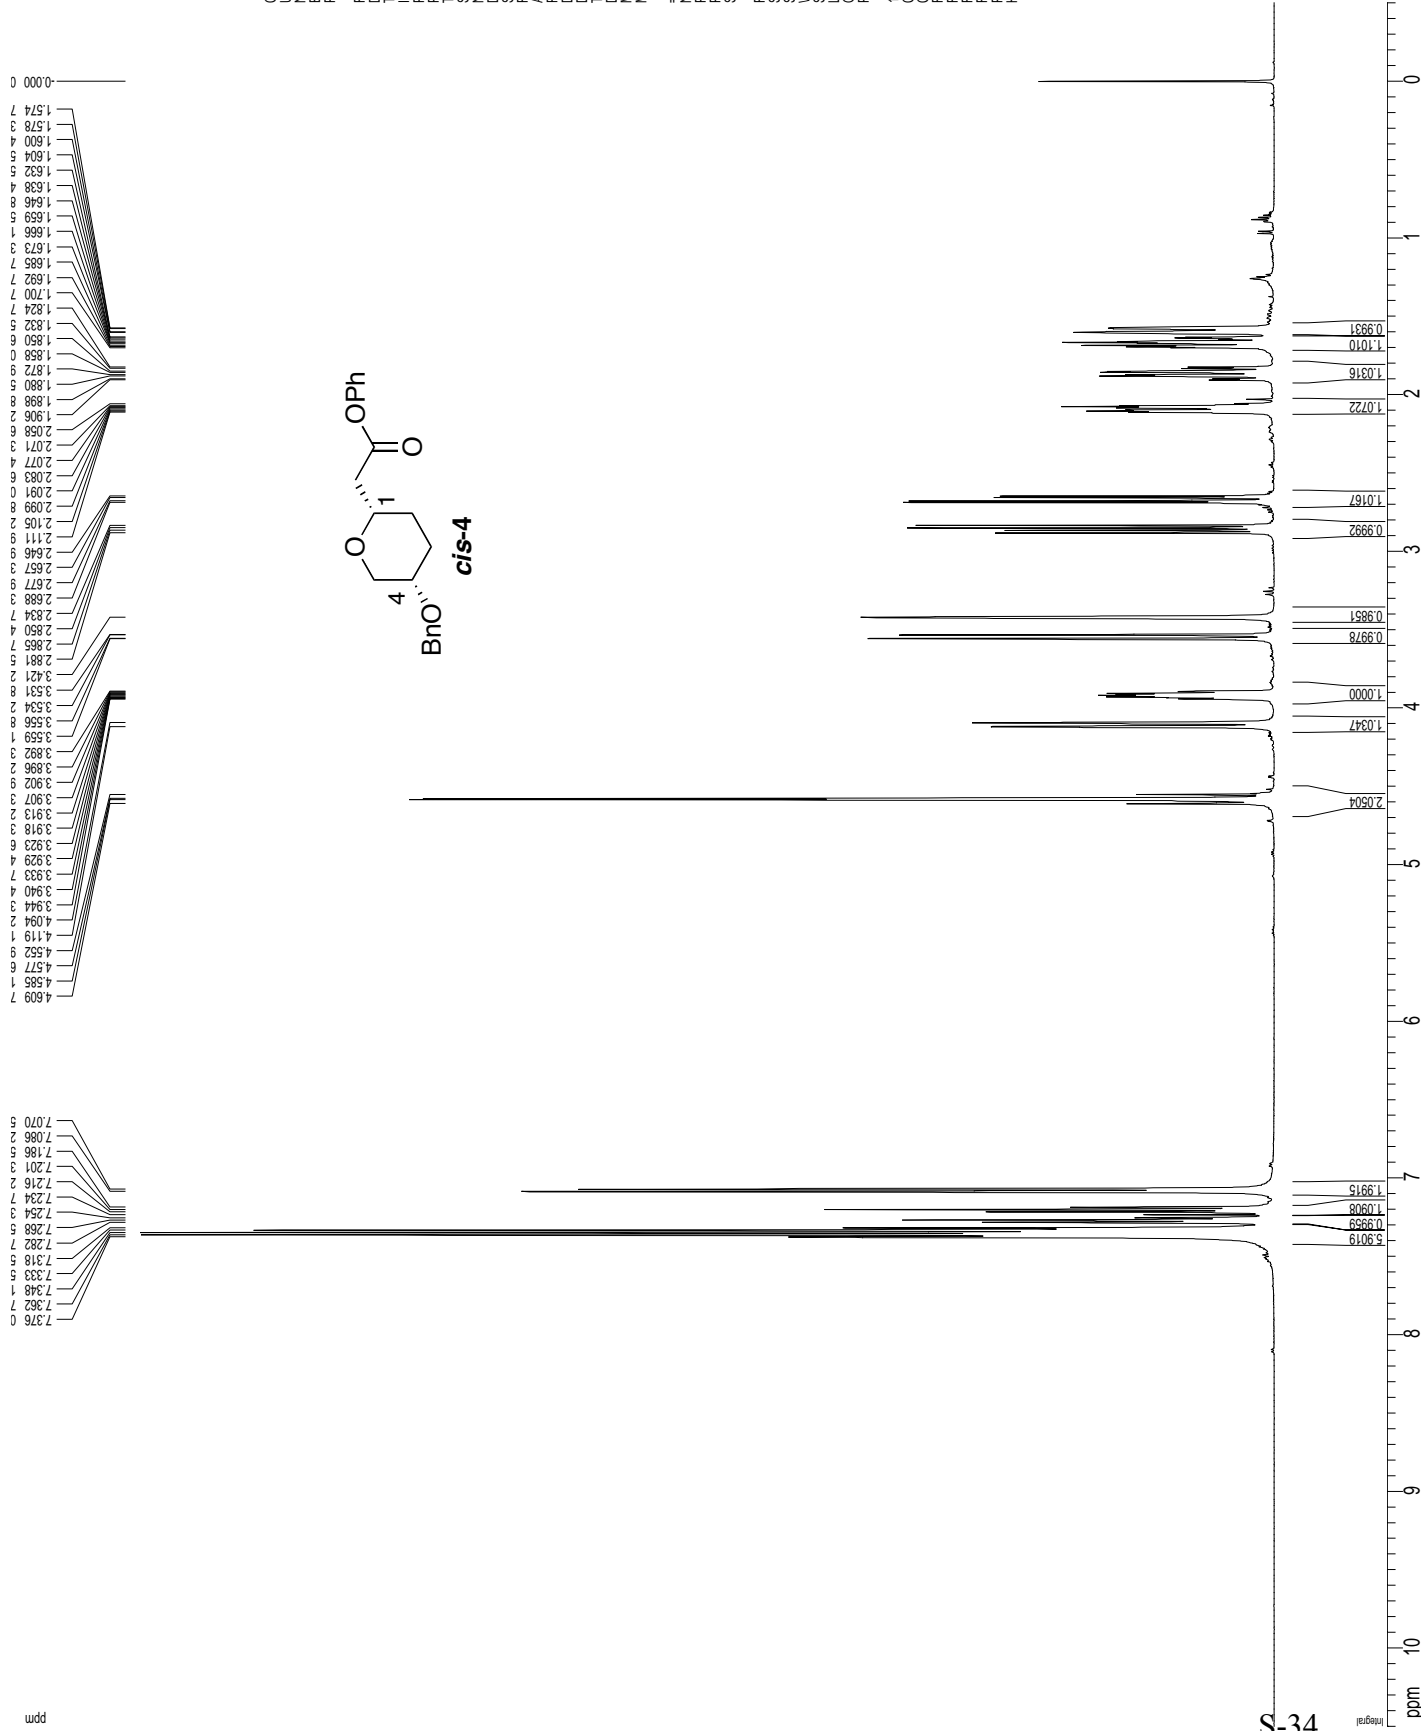

Current Data Parameters  
 USER: walter  
 NAME: WAS-III-154-30  
 EXPNO: 3  
 PROCNO: 1

F2 - Acquisition Parameters  
 Date\_ 200702  
 Time 23.48  
 INSTRUM: cryo500  
 PROBHD: 5 mm CPTCI-1H-  
 PULPROG: zg30  
 TD: 81728  
 SOLVENT: CDCl3T  
 NS: 8  
 DS: 0  
 SWH: 8072.820 Hz  
 FIDRES: 0.086043 Hz  
 AQ: 5.095986 sec  
 RG: 37.700  
 DW: 6.400 usec  
 DE: 6.000 usec  
 TE: 298.0 K  
 D1: 0.4000000 sec  
 MCREST: 0.0000000 sec  
 MCVRK: 0.0150000 sec

==== CHANNEL f1 =====  
 NUC1: 1H  
 P1: 8.00 usec  
 PL1: -1.80 dB  
 SFO1: 500.2250015 MHz

F2 - Processing parameters  
 SF: 500.220436 MHz  
 DSF: 65.000000 MHz  
 WDW: EM  
 SSB: 0  
 LB: 0.30 Hz  
 GB: 0  
 PC: 4.00

1D NMR plot parameters  
 CX: 22.80 cm  
 CY: 15.00 cm  
 F1P: 10.500 ppm  
 F2P: 5252.31 Hz  
 F3P: 0.000000 ppm  
 F2: -250.11 Hz  
 PPMCM: 0.48246 ppm/cm  
 HZCM: 241.33423 Hz/cm

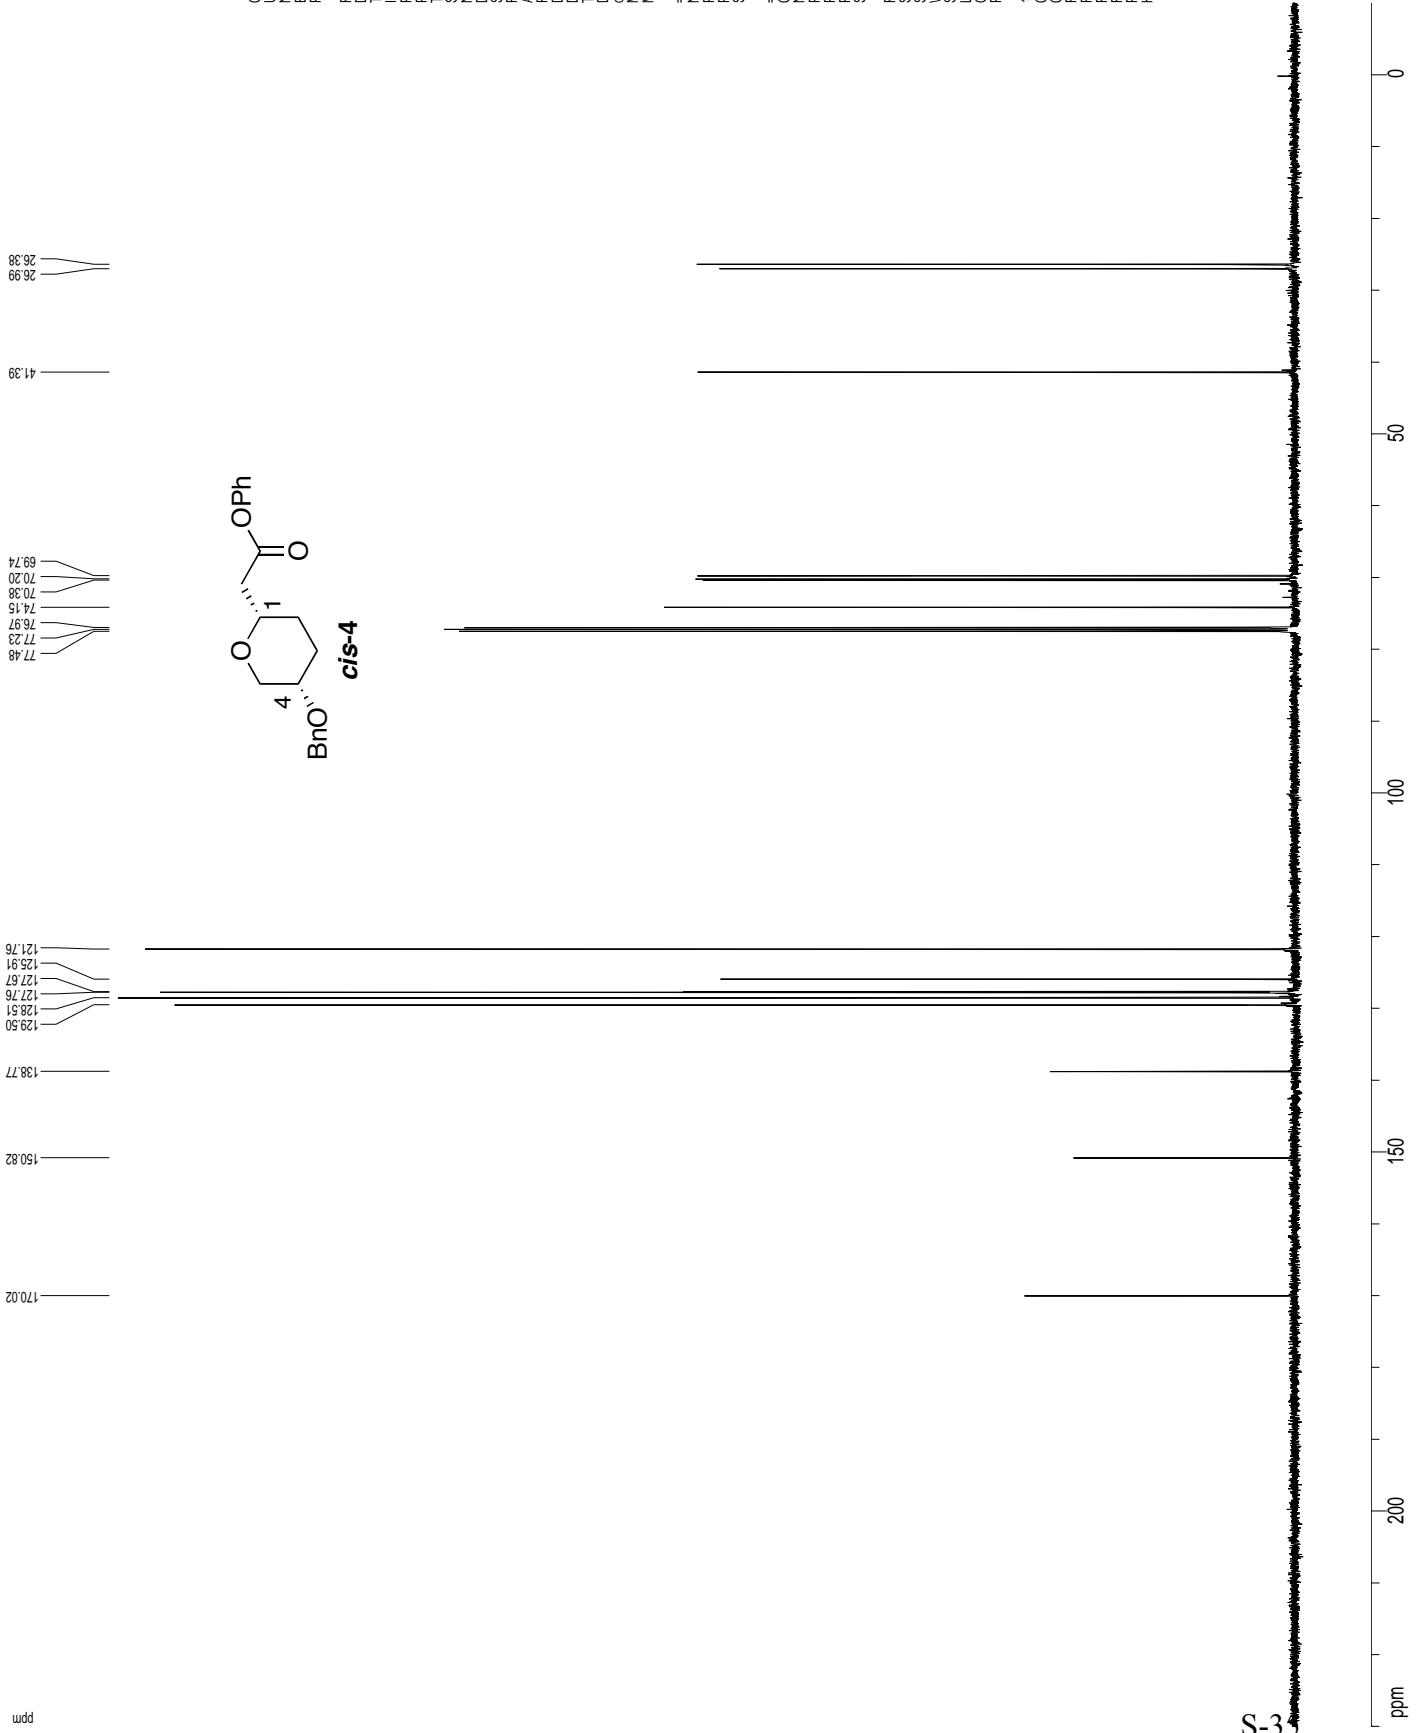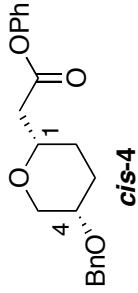

Current Data Parameters  
 USER walter  
 NAME WAS-III-154-30  
 EXPNO 2  
 PROCNO 1

F2 - Acquisition Parameters  
 Date\_ 20071002  
 Time 16.47  
 INSTRUM cryo500  
 PROBO 5 mm CPTC 1H-  
 PULPROG zgpg30  
 TD 65428  
 SOLVENT CDCl3  
 NS 76  
 DS 0  
 SWH 30003.031 Hz  
 FIDRES 0.463222 Hz  
 AQ 1.0794635 sec  
 RG 13004  
 DW 16.500 usec  
 DE 6.00 usec  
 TE 288.0 K  
 D1 0.25000000 sec  
 d11 0.03000000 sec  
 MCREST 0.00000000 sec  
 MCWRR 0.01500000 sec

==== CHANNEL f1 =====  
 NUC1 13C  
 P1 15.00 usec  
 PL1 -1.00 dB  
 SFO1 125.762548 MHz

==== CHANNEL f2 =====  
 CPDPRG2 waltz16  
 NUC2 1H  
 PCPD2 100.00 usec  
 PL2 1.60 dB  
 PL12 23.54 dB  
 SFO2 500.2225011 MHz

F2 - Processing parameters  
 SI 65536  
 SF 125.7604112 MHz  
 WDW EM  
 SSB 0  
 GB 1.00 Hz  
 PC 2.00

1D NMR ph2 parameters  
 CX 22.80 cm  
 CY 15.65 cm  
 F1P 230.000 ppm  
 F1 28929.49 Hz  
 F2P -10.000 ppm  
 F2 -1257.80 Hz  
 PPM1CM 10.52632 ppm/cm  
 HZCM 1324.00439 Hz/cm

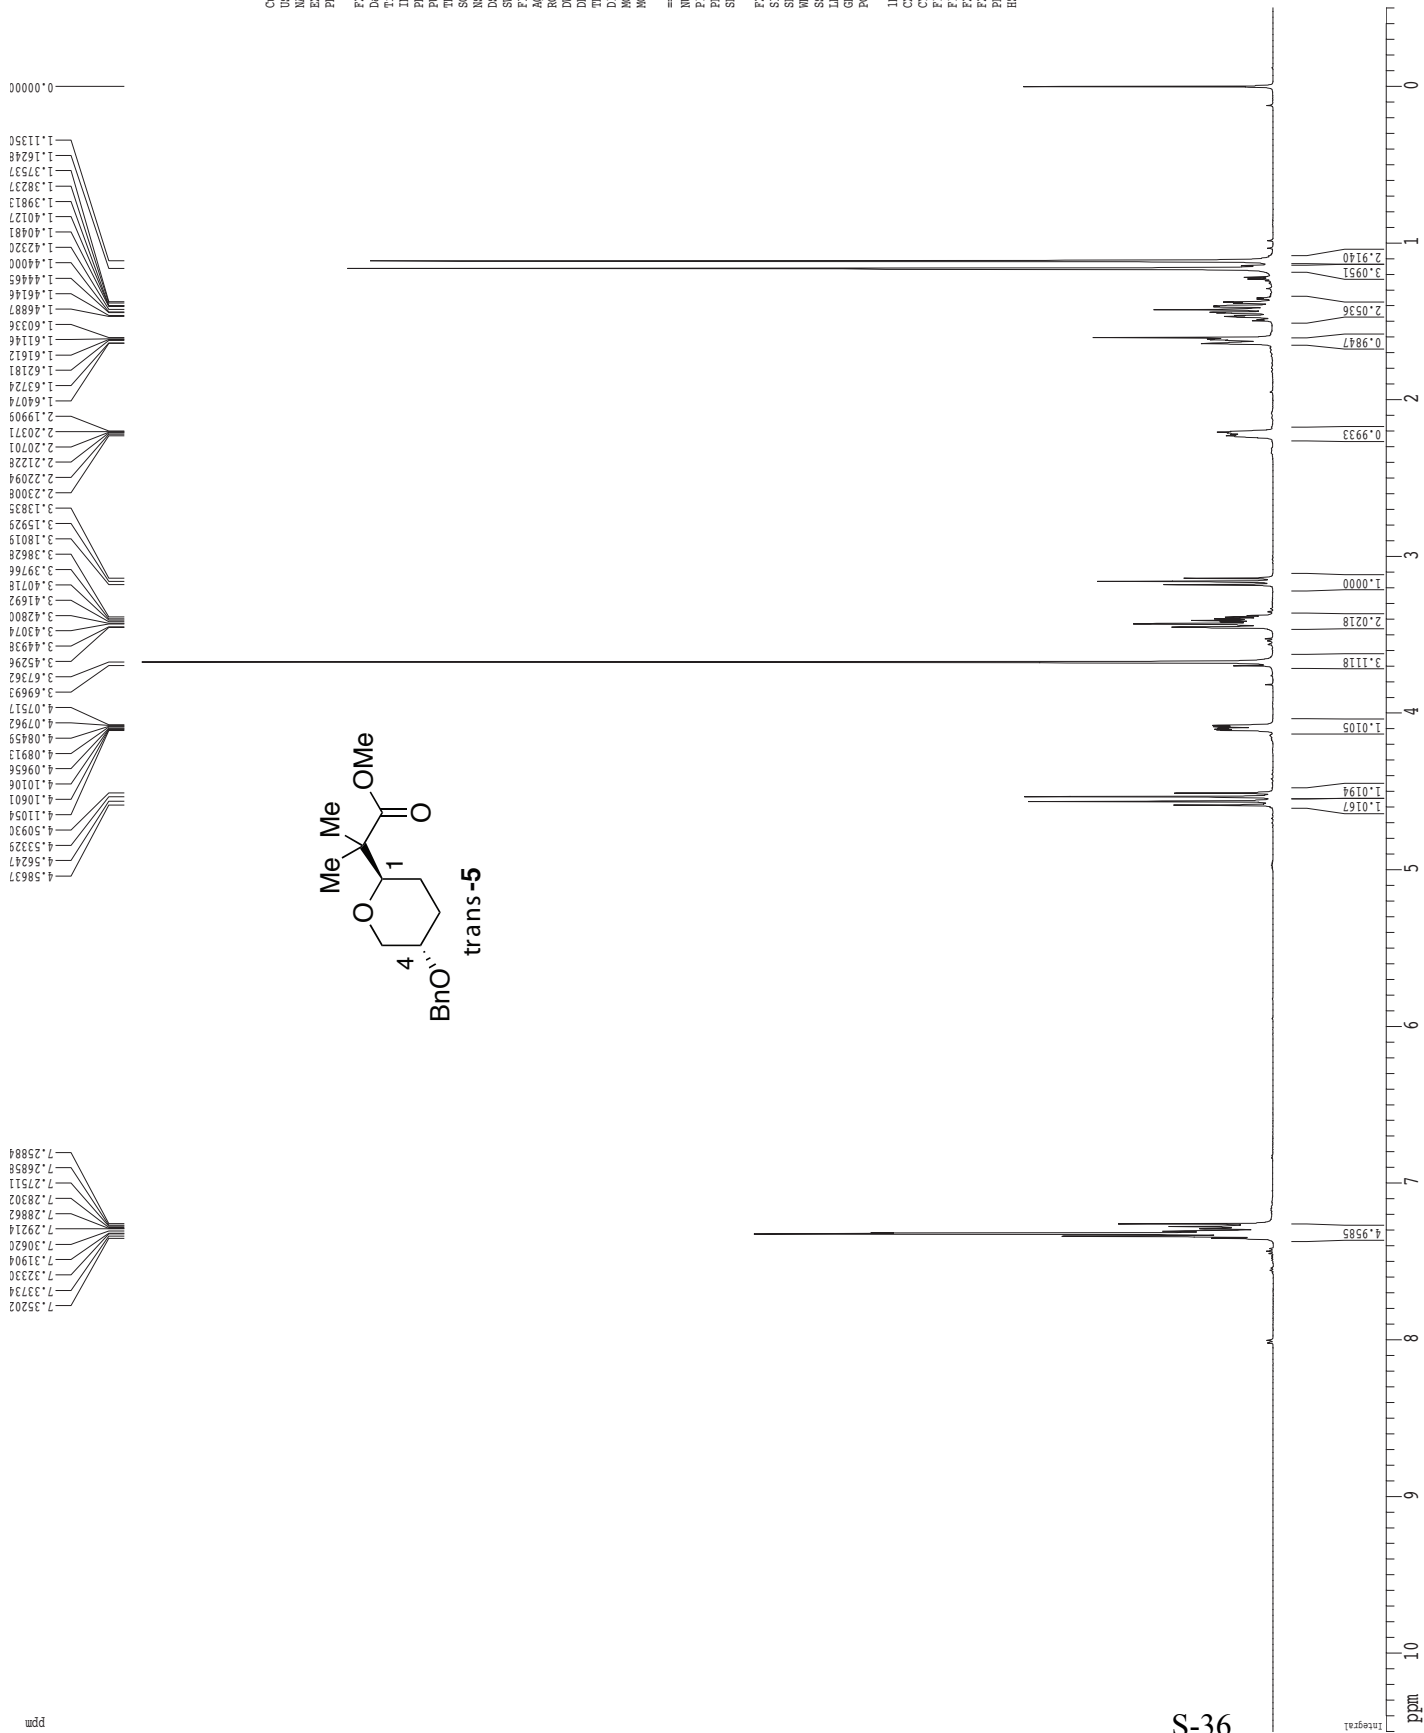

WAS-IV\_17-35  
 13C spectrum with 1H decoupling

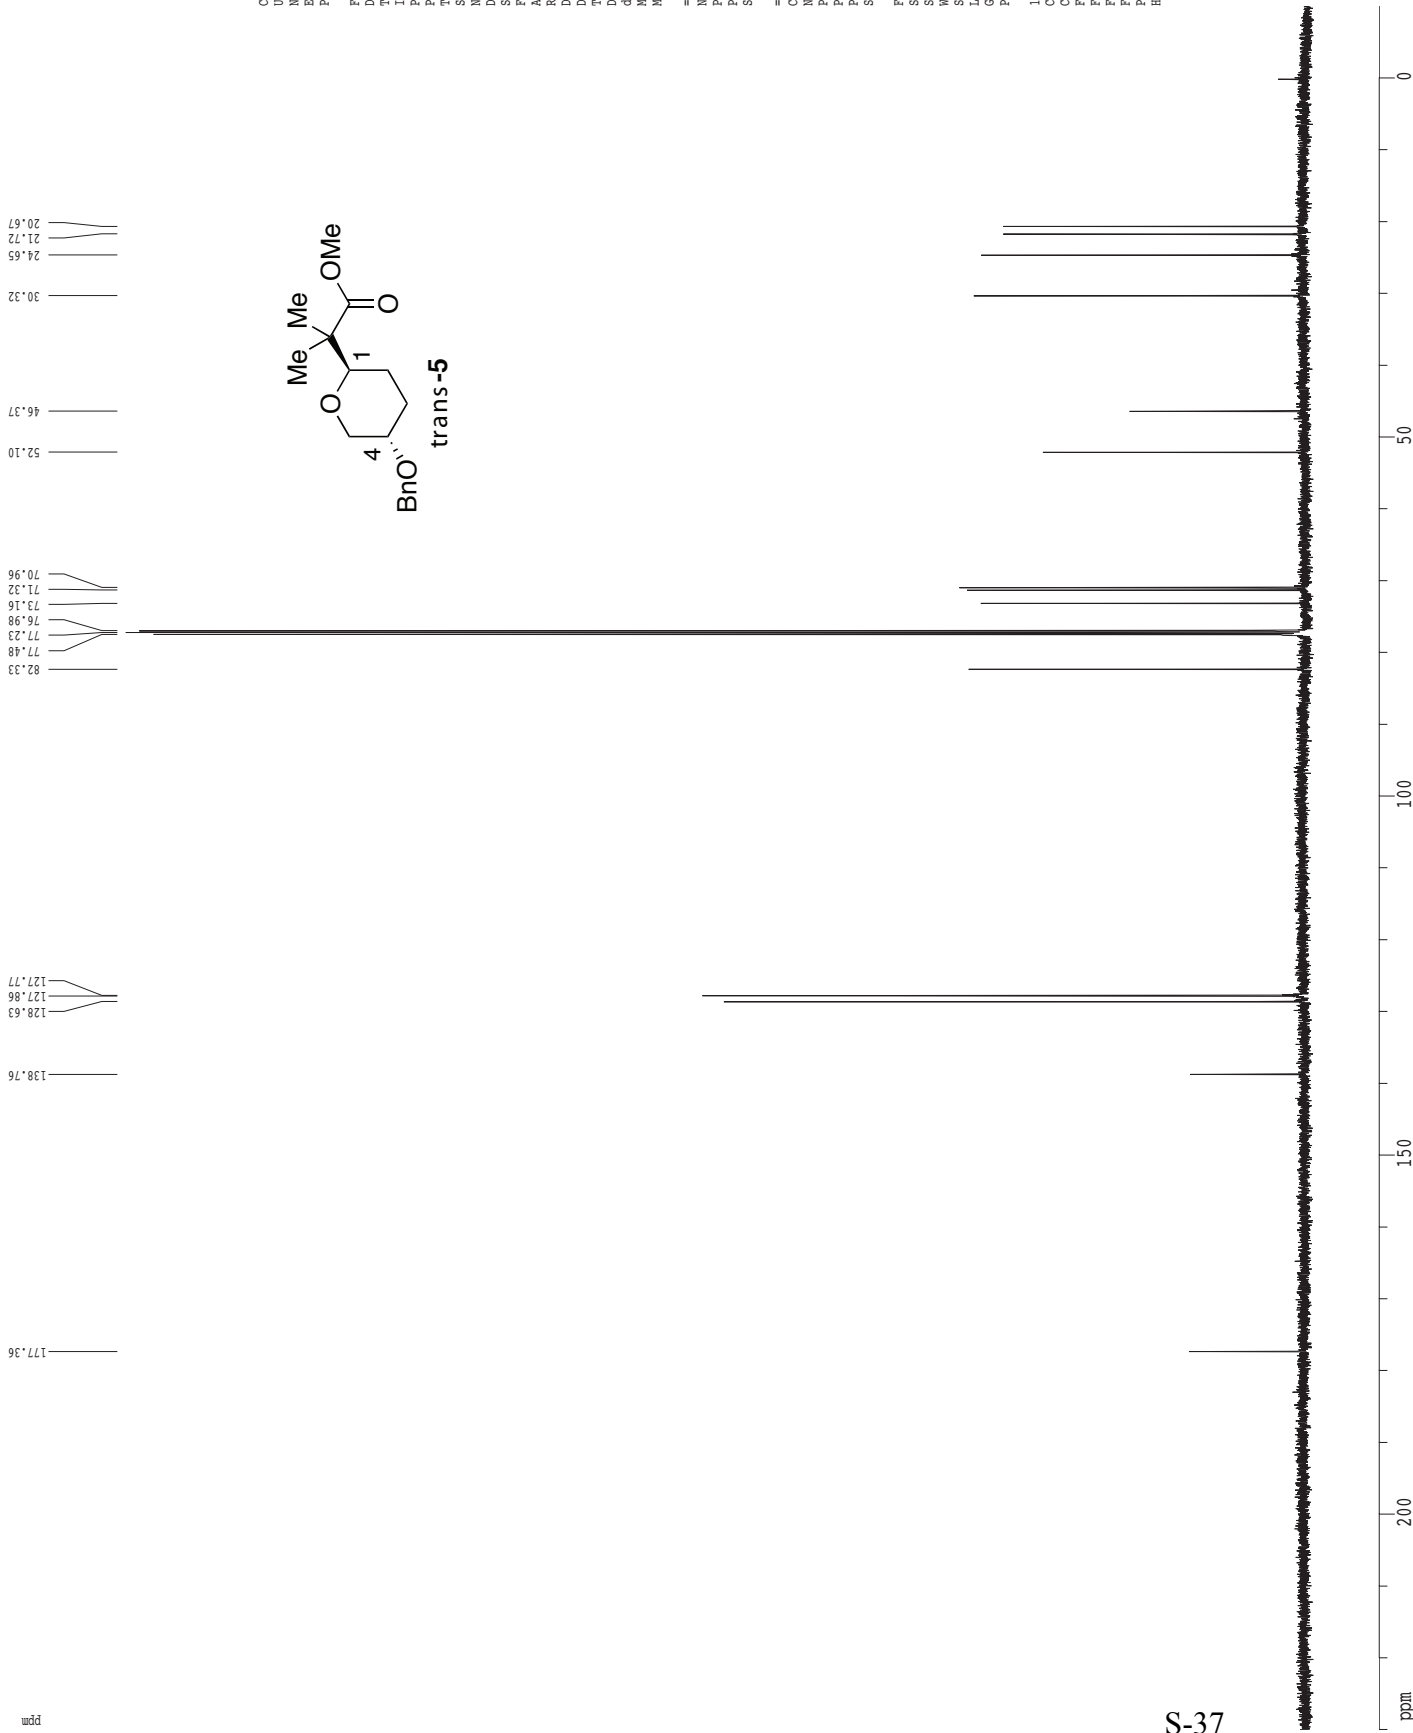

```

Current Data Parameters
USER      walter
NAME      WAS-IV-17-35
EXPNO     2
PROCNO    1

F2 - Acquisition Parameters
Date_     20080408
Time      11.07
INSTRUM   cryo500
PROBHD    5 mm CPXI.H-
PULPROG   zgpg30
TD         65536
SOLVENT   CDCl3
NS         106
DS         3003.03 Hz
SWH        0.246238 Hz
FIDRES     1.6814105 sec
AQ         1.0004
RG         16.500 usec
DE         6.00 usec
TE         298.0 K
D1         0.25000000 sec
d11        0.03000000 sec
MCREST     0.00000000 sec
MORPK      0.01500000 sec

===== CHANNEL f1 =====
NUC1       13C
P1         14.75 usec
PL1        -1.00 dB
SFO1       125.7942348 MHz

===== CHANNEL f2 =====
CPDPRG2    waltz16
NUC2
P2         100.00 usec
PL2        -1.60 dB
PL12       24.80 dB
SFO2       500.225011 MHz

F2 - Processing parameters
SI         65536
SF         125.7844006 MHz
WDW        EM
SSB        0
LB         1.00 Hz
GB         0
PC         2.00

ID NMR plot parameters
X         72.80 cm
Y         72.80 cm
F1        230.000 ppm
F2        28929.49 Hz
F3        -10.000 ppm
F4        -1257.80 Hz
PRNCM     10.52632 ppm/cm
HZCM      1324.00477 Hz/cm
  
```

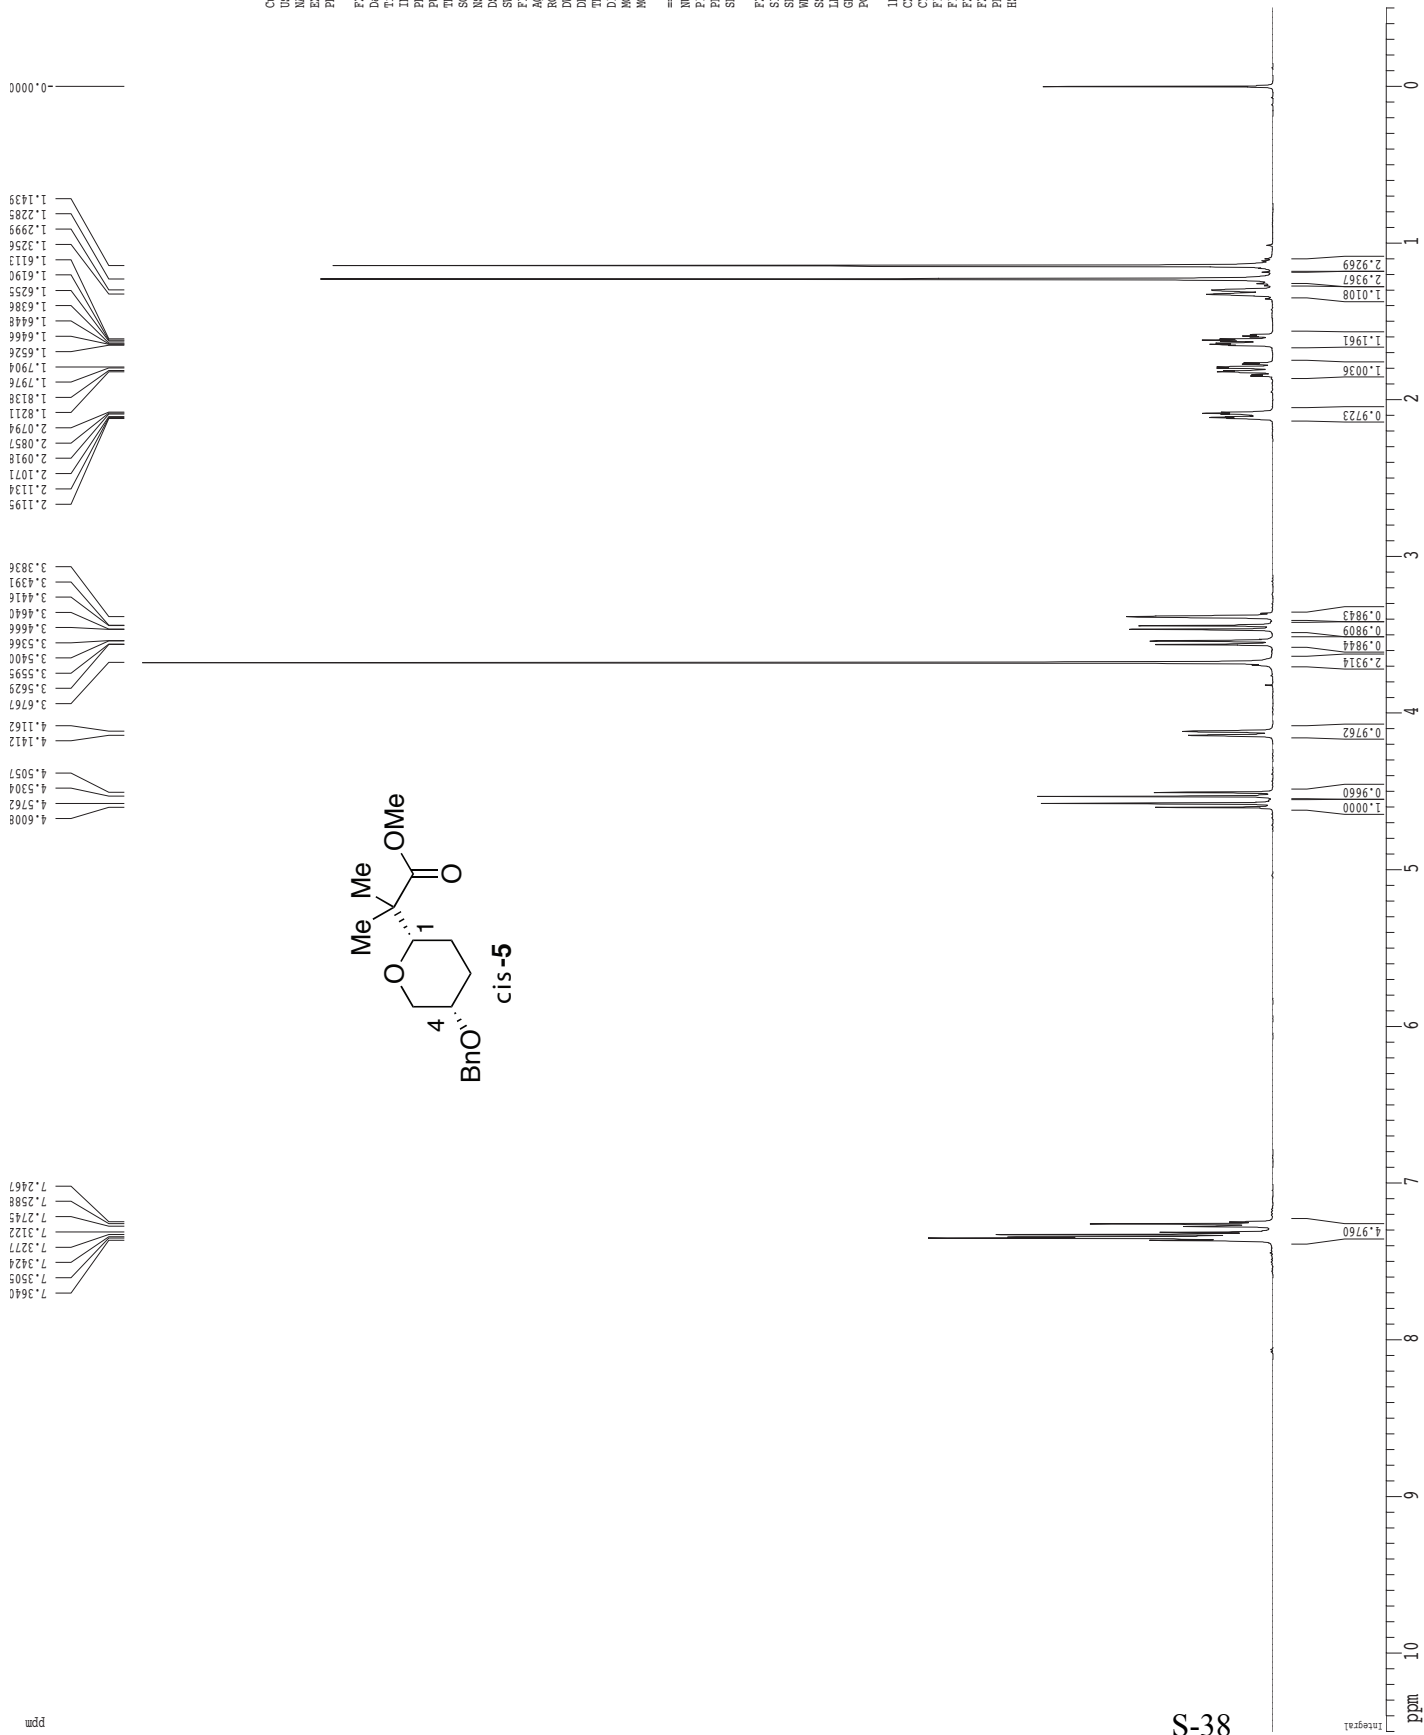

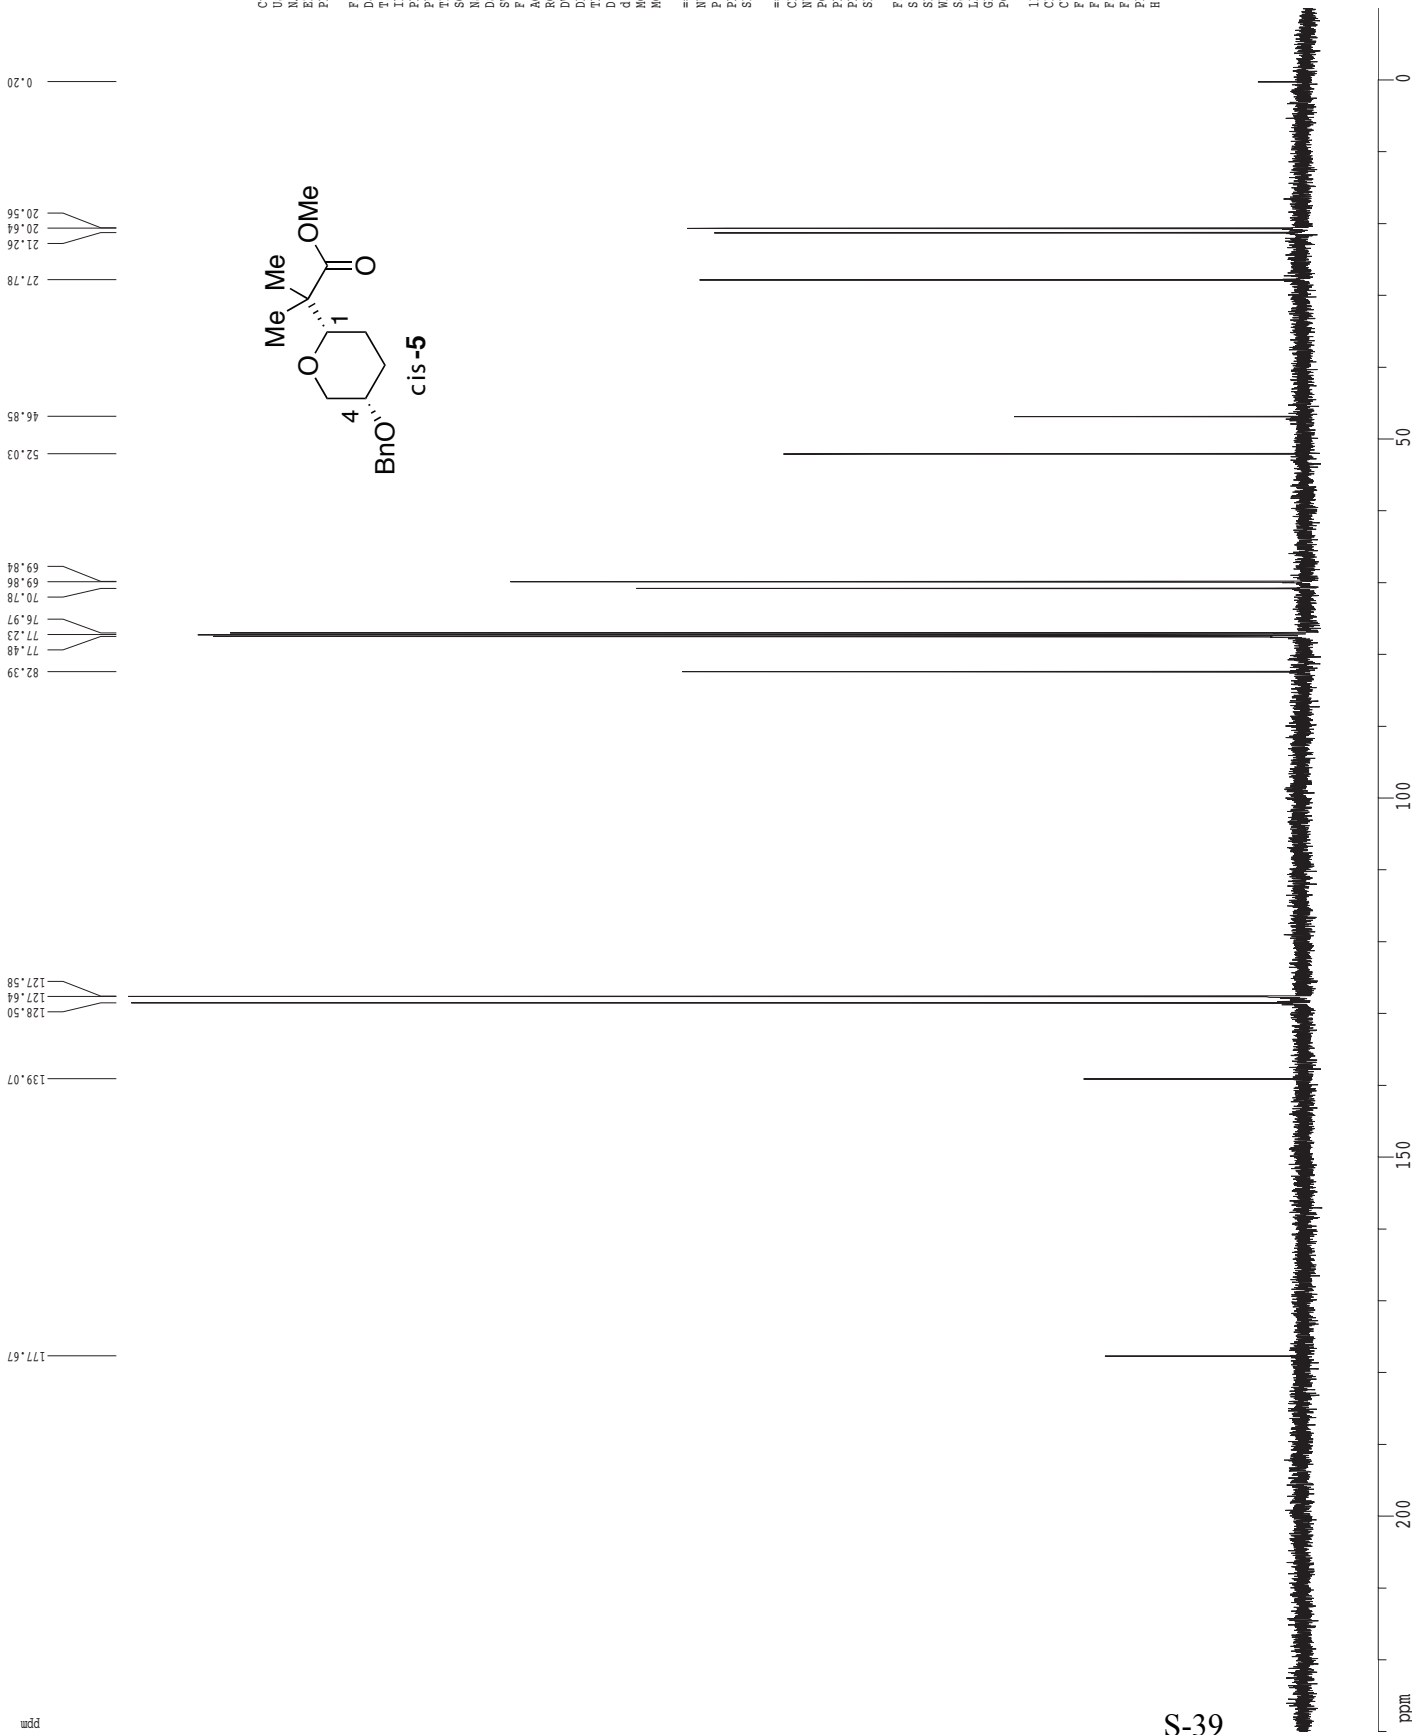

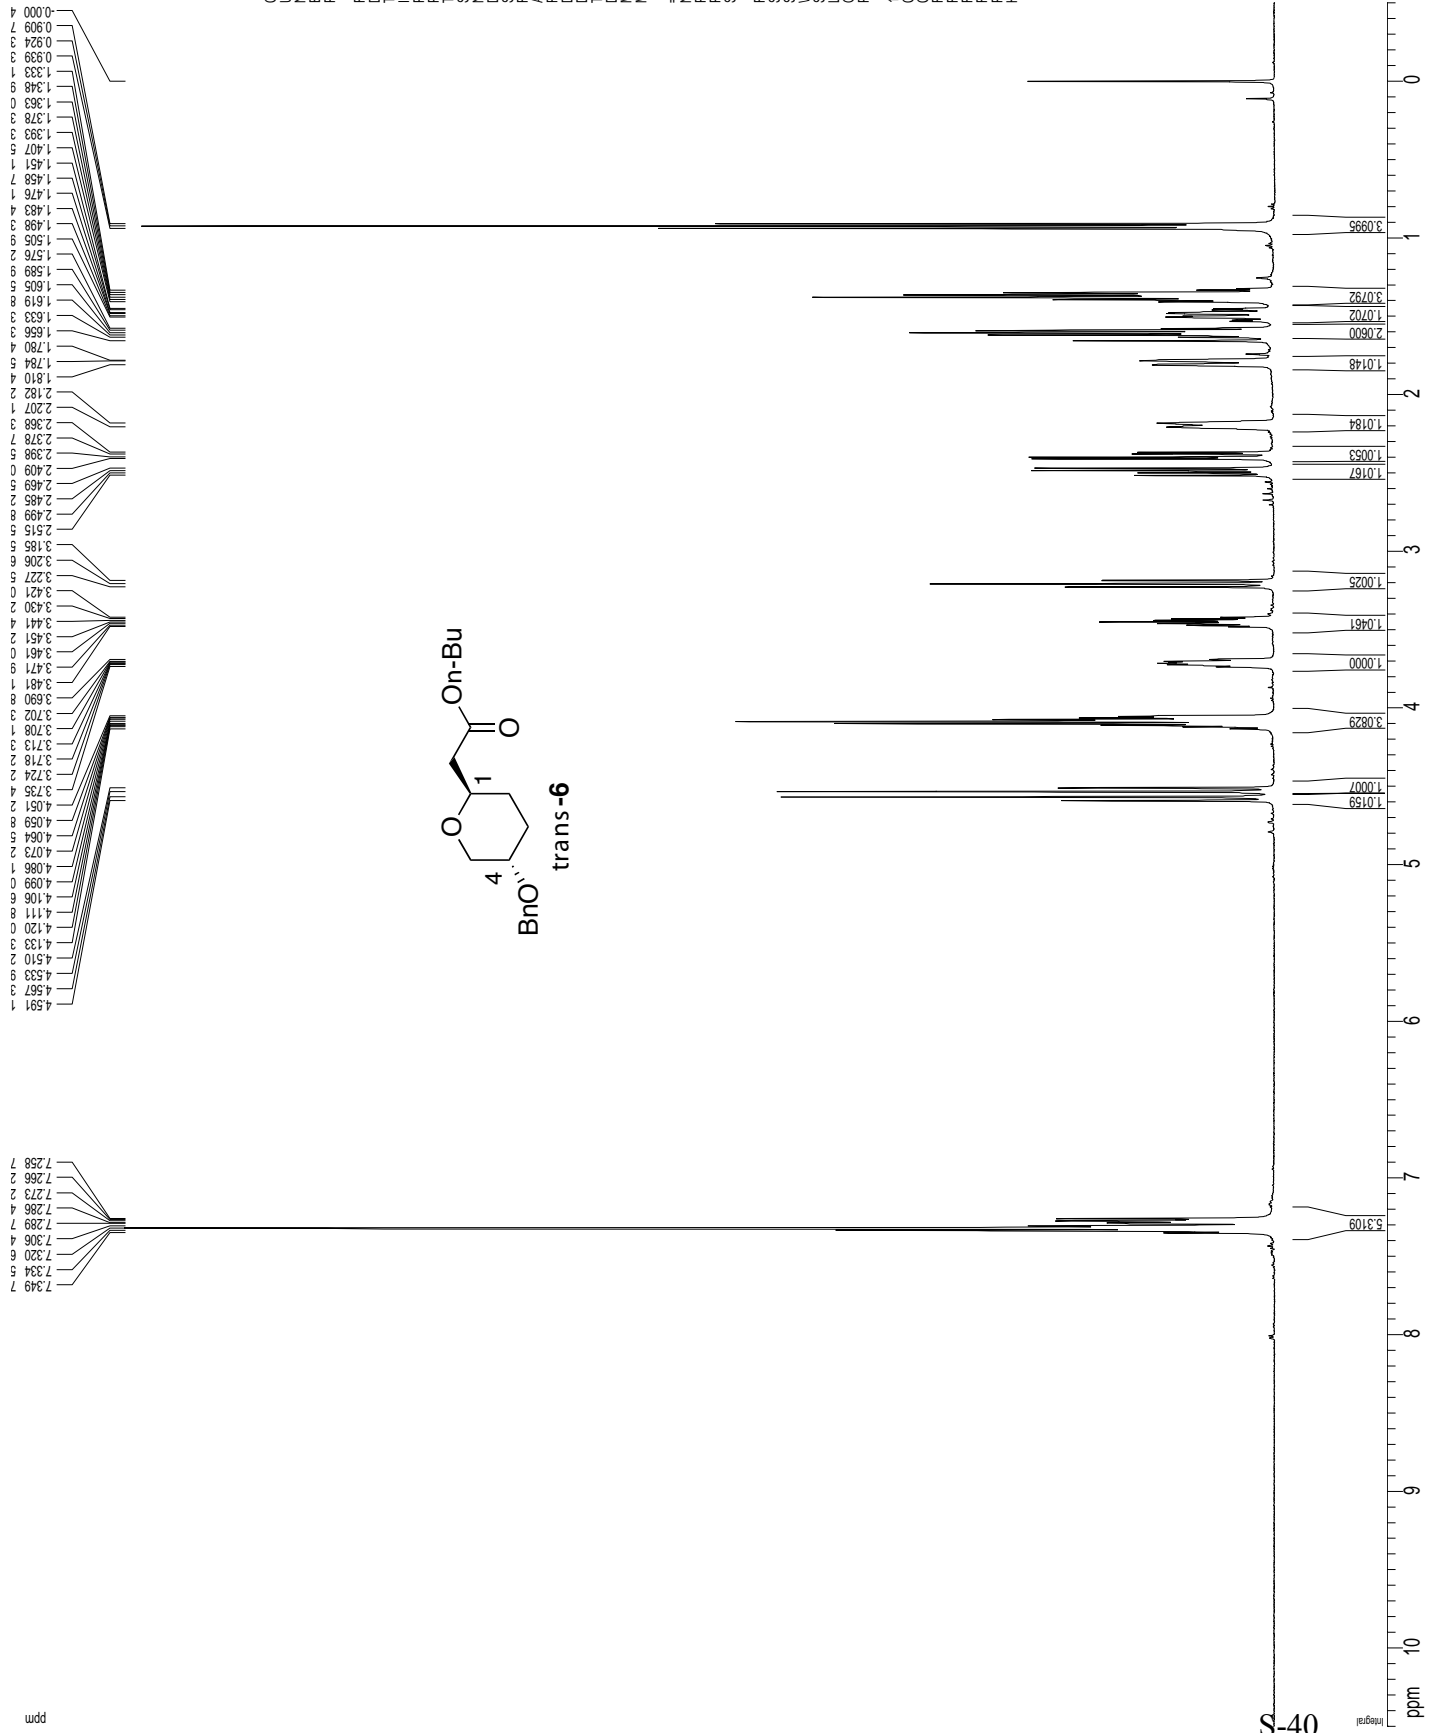

Current Data Parameters  
 USER: walter  
 NAME: WAS-III-97-25  
 EXPNO: 5  
 PROCNO: 1

F2 - Acquisition Parameters  
 Date\_: 20070516  
 Time: 14.43  
 INSTRUM: crys500  
 PROBHID: 5 mm CPTCI-1H-  
 PULPROG: zg30  
 TD: 81728  
 SOLVENT: CDCl3T  
 NS: 1  
 DS: 0  
 SWH: 8072.820 Hz  
 FIDRES: 0.086043 Hz  
 AQ: 5.0889774 sec  
 SFO1: 500.136099 MHz  
 DQ: 6.300 usec  
 DE: 6.000 usec  
 TE: 298.0 K  
 D1: 0.10000000 sec  
 MCREST: 0.00000000 sec  
 MCVRK: 0.01500000 sec

==== CHANNEL f1 =====  
 NUC1: 1H  
 P1: 8.00 usec  
 PL1: 1.60 dB  
 SFO1: 500.2250015 MHz

F2 - Processing parameters  
 SI: 32768  
 SF: 500.220324 MHz  
 DSF: 65536  
 WDW: EM  
 SSB: 0  
 LB: 0.30 Hz  
 GB: 0  
 PC: 4.00

1D NMR plot parameters  
 CX: 22.80 cm  
 CY: 15.00 cm  
 F1P: 10.500 ppm  
 F2P: 5252.31 Hz  
 F3P: 0.000 ppm  
 FZ: -250.1 Hz  
 PPM1CM: 0.48246 ppm/cm  
 HZCM: 241.33423 Hz/cm



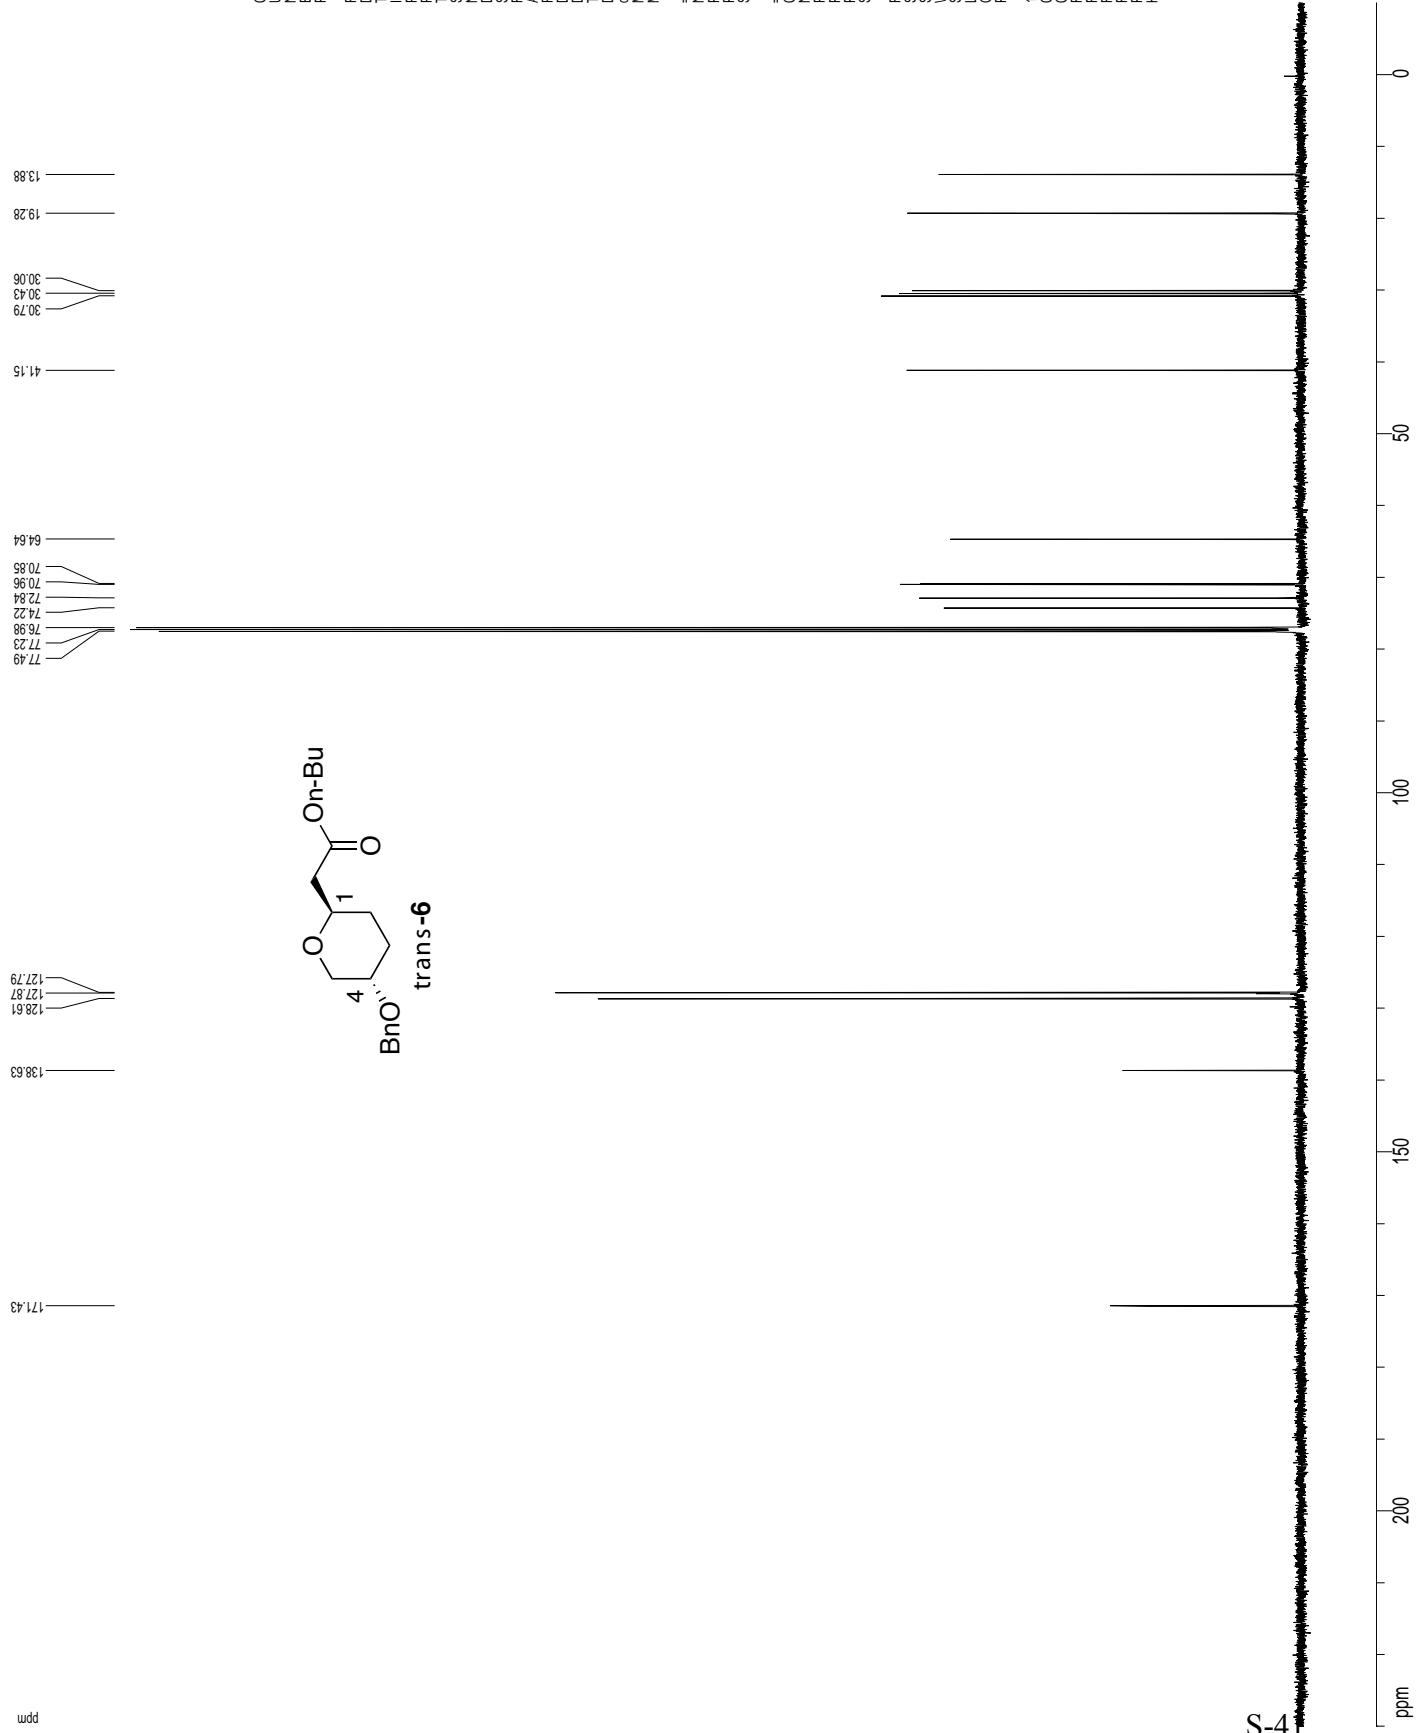

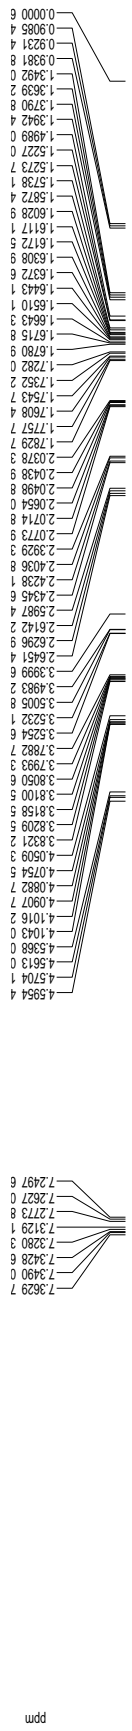

Current Data Parameters  
 USER: walter  
 NAME: WAS-III-97-27  
 EXPNO: 5  
 PROCNO: 1  
 F2-Acquisition Parameters  
 Date\_ 20070516  
 Time 14.36  
 INSTRUM: cryo500  
 PROBHD: 5 mm CPTCI 1H-  
 PULPROG: zg30  
 TD: 81728  
 SOLVENT: CDCl3T  
 NS: 1  
 DS: 0  
 SWH: 8072.820 Hz  
 FIDRES: 0.086043 Hz  
 AQ: 5.0899774 sec  
 RG: 5  
 DV: 6240.000 sec  
 DE: 6.000 sec  
 TE: 298.0 K  
 D1: 0.40000000 sec  
 MCREST: 0.00000000 sec  
 MCVRK: 0.01500000 sec  
 ===== CHANNEL f1 =====  
 NUC1: 1H  
 P1: 8.00 usec  
 PL1: 1.60 dB  
 SFO1: 500.2250015 MHz  
 F2-Processing parameters  
 SF: 500.220305 MHz  
 DSF: 65.00000000  
 WDW: EM  
 SSB: 0  
 LB: 0.30 Hz  
 GB: 0  
 PC: 4.00  
 1D MMR plot parameters  
 CX: 22.80 cm  
 CY: 15.00 cm  
 F1P: 10.500 ppm  
 F2P: 52.231 Hz  
 F3P: 0.00000000 ppm  
 F2: -250.11 Hz  
 PPM1CM: 0.48246 ppm/cm  
 HZCM: 241.33423 Hz/cm

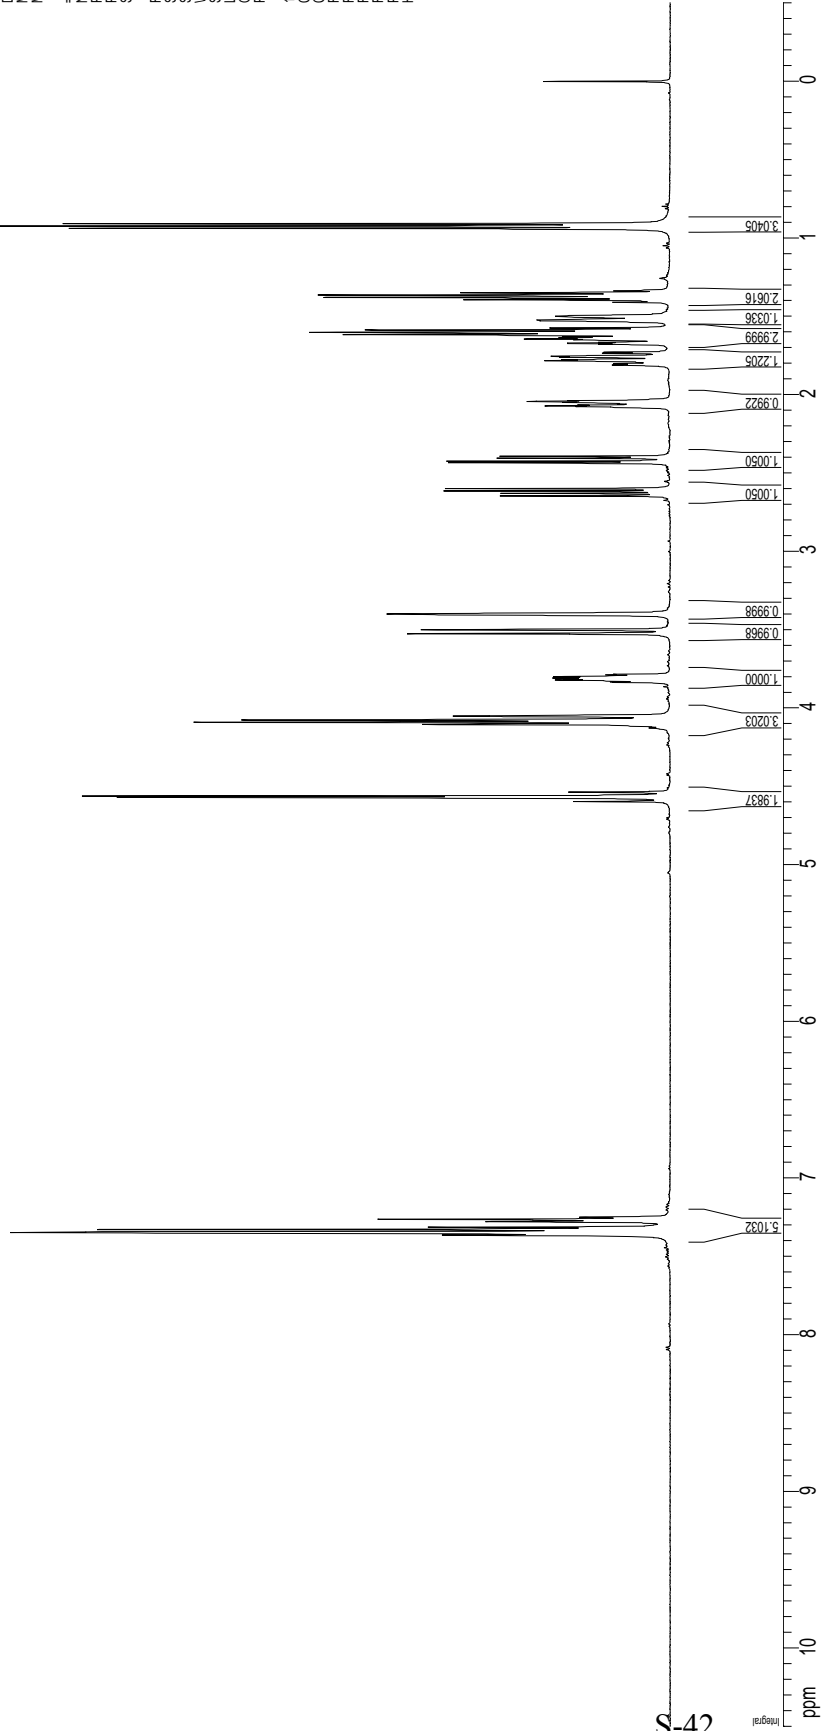

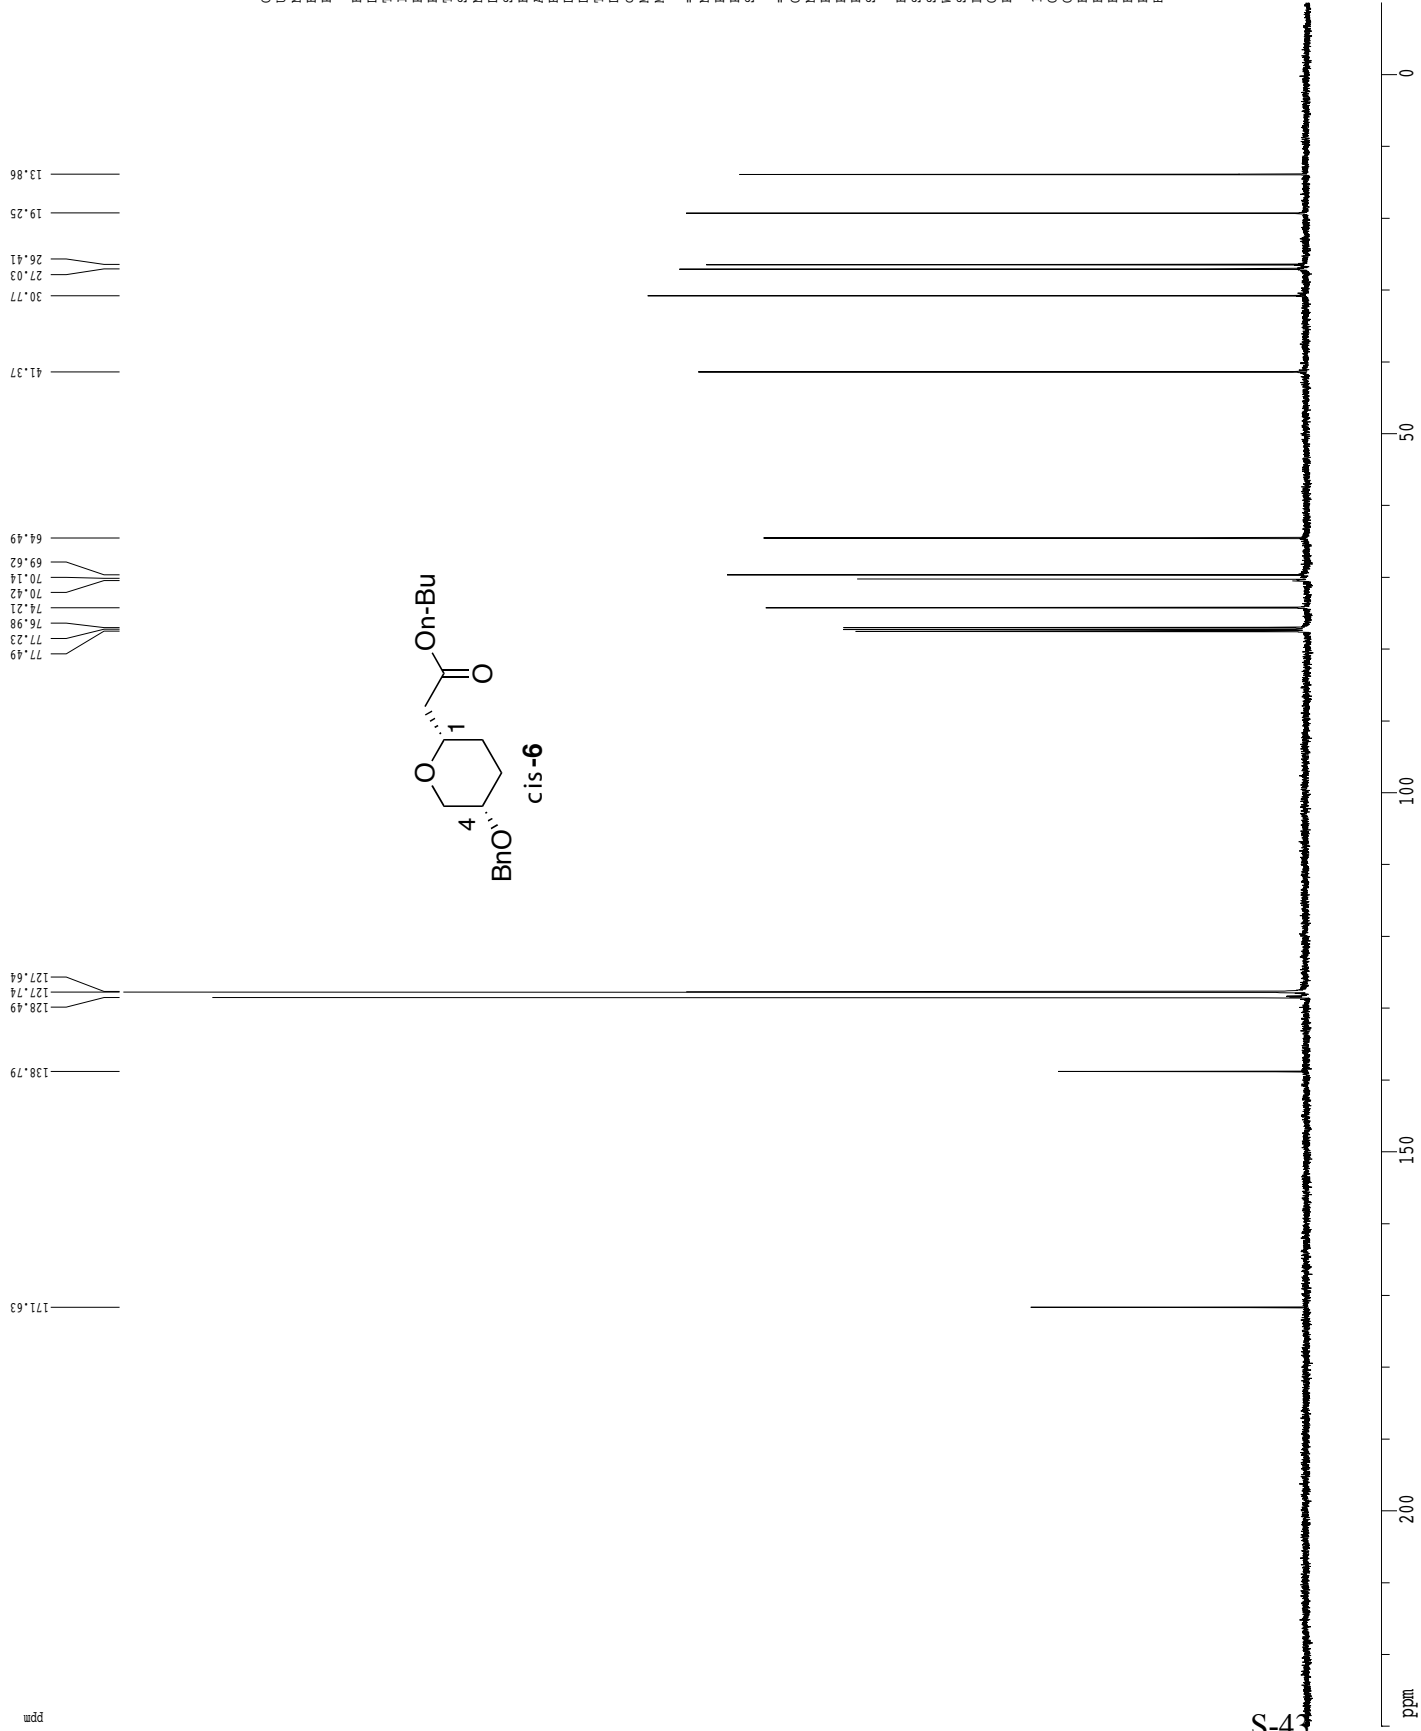

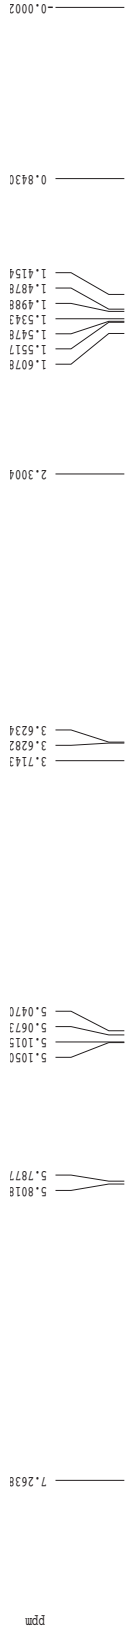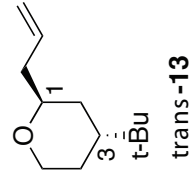

```

Current Data Parameters
USER      walter
NAME      WAS-III-58-27
EXPNO     2
PROCNO    1

F2 - Acquisition Parameters
Date_     20070212
Time      17.18
INSTRUM   cryo500
PROBHD    5 mm CPXI IH-
PULPROG   zgpg30
NUC1       13
SOLVENT   CDCl3
NS         8
DS         0
SWH        8012.820 Hz
FIDRES     0.098043 Hz
AQ         5.0998774 sec
RG         5
DW         62.400 usec
DE         6.00 usec
TE         298.0 K
D1         0.10000000 sec
ACRESF     0.00000000 sec
ACQRW      0.01500000 sec

===== CHANNEL f1 =====
NUC1       13
P1         8.00 usec
PL1        1.60 dB
SFO1       500.2235015 MHz

F2 - Processing parameters
SI         65536
SF         500.2200305 MHz
WDW        EM
SSB        0
LB         0.20 Hz
GB         0
PC         4.00

ID NMR plot parameters
CX         22.80 cm
CY         15.00 cm
F1P        8.000 ppm
F1         4001.76 Hz
F2P        -0.500 ppm
F2         -250.11 Hz
PPMCH     0.37281 ppm/cm
HZCH      186.49555 Hz/cm
    
```

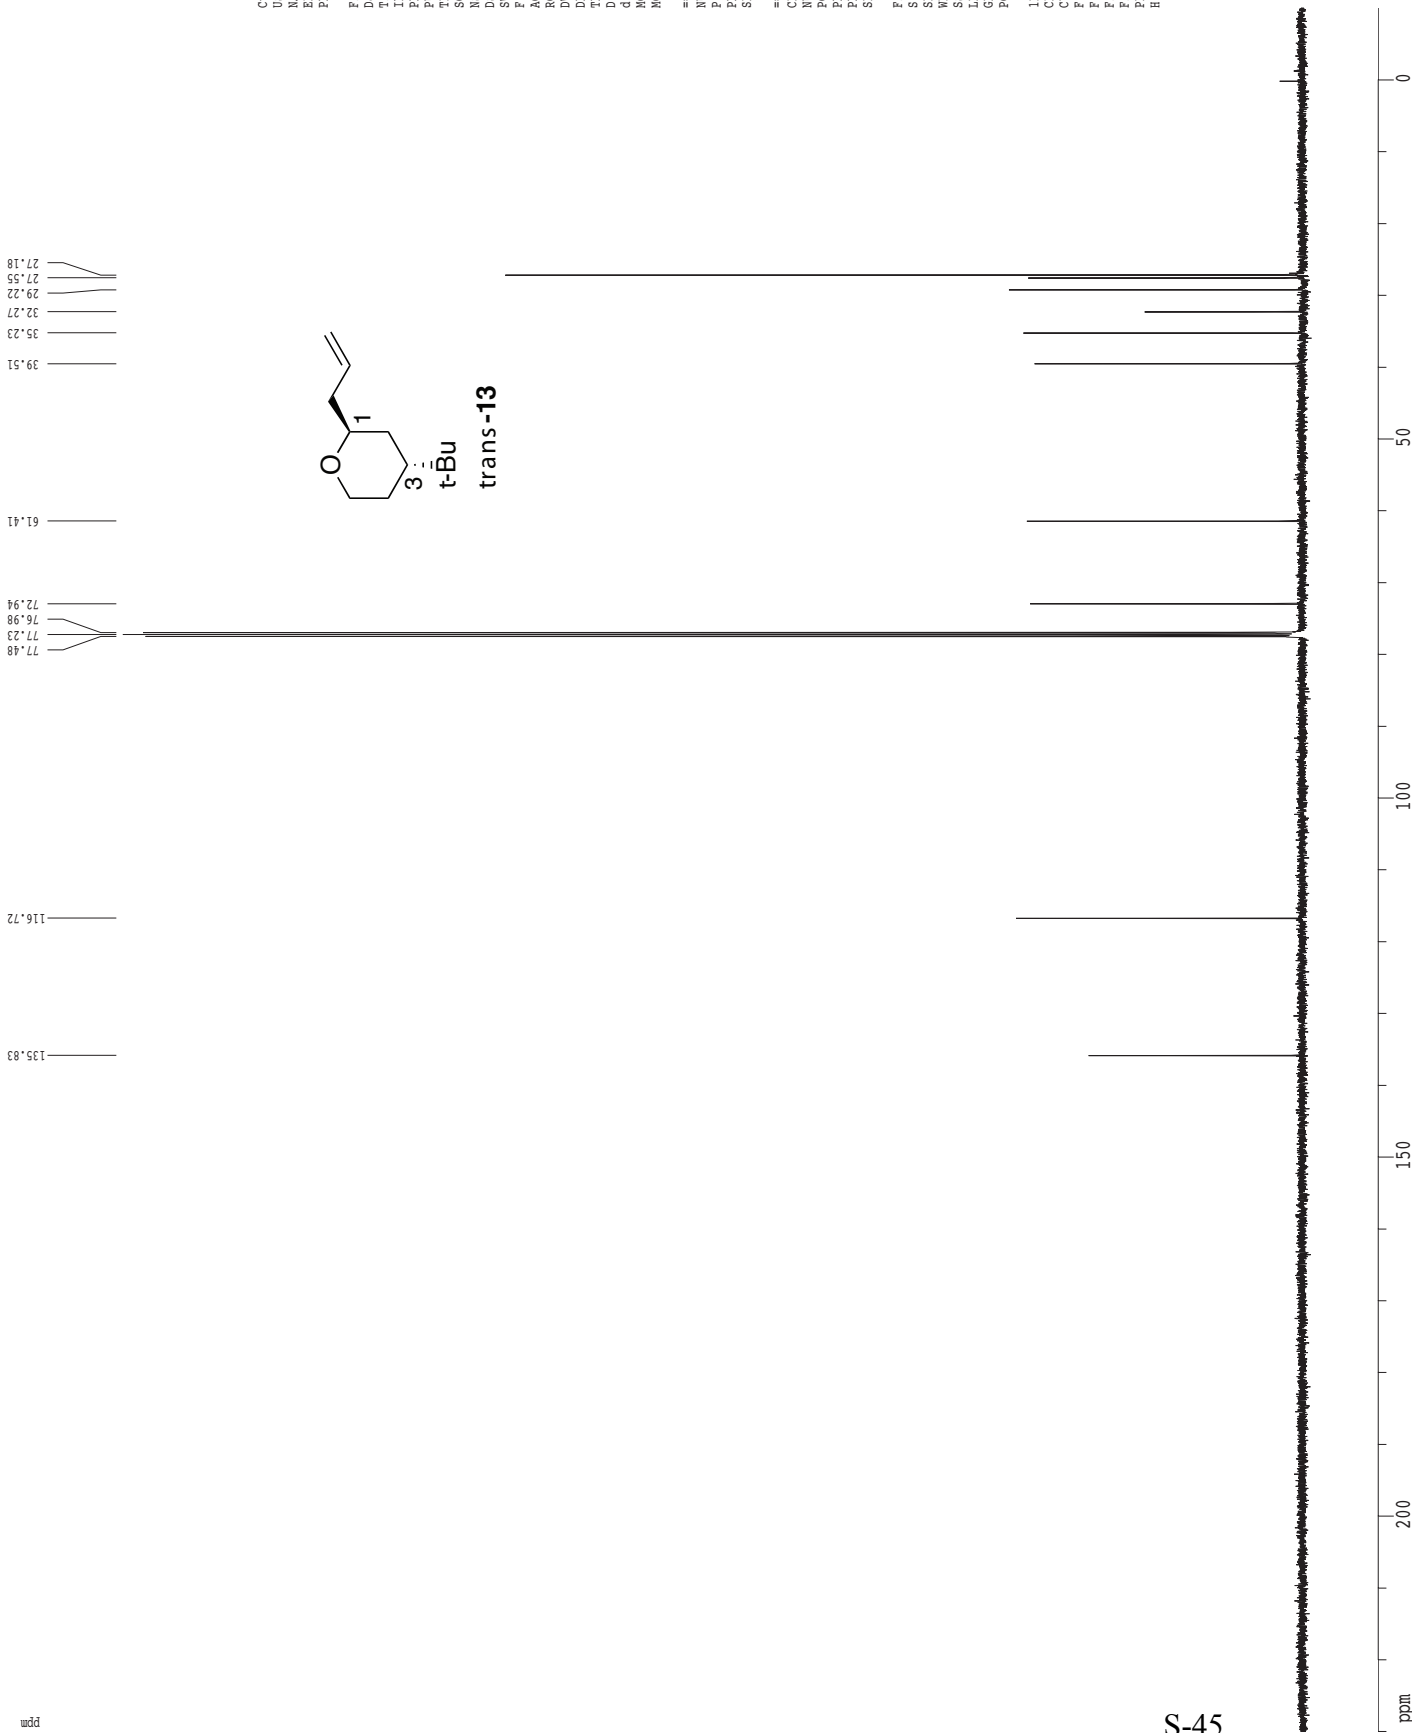

Current Data Parameters  
USER walter  
NAME MS-111-0427  
EXPNO 10  
PROCNO 1

F2 - Acquisition Parameters  
Date\_ 20070212  
Time 17:22  
INSTRUM cryo500  
PROBHD 5 mm CPXI 1H-  
PULPROG zgpg30  
TD 65418  
SOLVENT CDCl3  
NS 150  
DS 4  
SWH 30303.03 Hz  
FIDRES 0.246222 Hz  
AQ 1.0794470 sec  
RG 91895.2  
DW 16.500 usec  
DE 6.00 usec  
TE 298.0 K  
D1 0.2500000 sec  
d11 0.0300000 sec  
MCREST 0.0000000 sec  
MORPK 0.0150000 sec

==== CHANNEL f1 =====  
NUC1 13C  
P1 15.00 usec  
PL1 -1.00 dB  
SFO1 125.7942348 MHz

==== CHANNEL f2 =====  
CPDPRG2 waltz16  
NUC2 1H  
PCPD2 100.00 usec  
PL2 -1.60 dB  
PL12 23.54 dB  
SFO2 500.2225011 MHz

F2 - Processing parameters  
SI 65536  
SF 125.7803987 MHz  
WDW EM  
SSB 0  
LB 1.00 Hz  
GB 0  
PC 2.00

1D NMR plot parameters  
X 72.94 cm  
Y 23.54 cm  
F1 28929.49 ppm  
F2 -10.000 ppm  
F2 -1257.80 Hz  
PRCM 10.52632 ppm/cm  
HZCM 1324.00427 Hz/cm

WAS-III-62-26  
1H spectrum

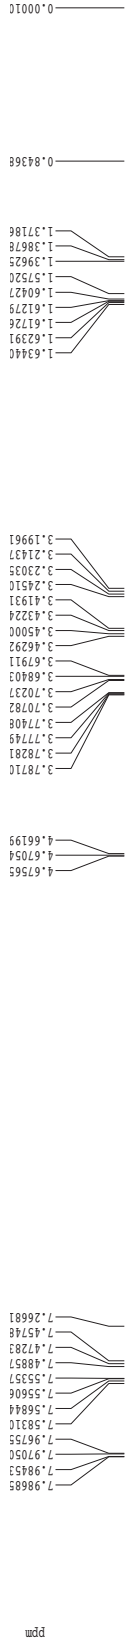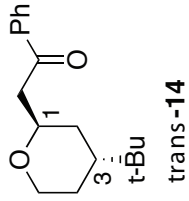

Current Data Parameters  
 USER: walter  
 NAME: WAS-III-62-26  
 EXPNO: 1  
 PROCNO: 1

F2 - Acquisition Parameters  
 Date\_: 20070222  
 Time: 17:38  
 INSTRUM: cryo500  
 PROBD: 5 mm CPXI IH-  
 PULPROG: zgpg30  
 SOLVENT: CDCl3  
 NS: 8  
 DS: 0  
 SWH: 8012.820 Hz  
 FIDRES: 0.098043 Hz  
 AQ: 5.0998774 sec  
 RG: 6.3  
 DW: 62.400 usec  
 DE: 6.00 usec  
 TE: 298.0 K  
 D1: 0.10000000 sec  
 ACRESF: 0.00000000 sec  
 ACPRR: 0.01500000 sec

==== CHANNEL f1 =====  
 NU1: 1H  
 P1: 8.00 usec  
 PL1: 1.60 dB  
 SFO1: 500.2235015 MHz

F2 - Processing parameters  
 SI: 65536  
 SF: 500.2200278 MHz  
 WDW: EN  
 SSB: 0  
 LB: 0.30 Hz  
 GB: 0  
 PC: 4.00

ID NMR plot parameters  
 CX: 22.80 cm  
 CY: 15.00 cm  
 F1P: 9.000 ppm  
 F1: 4501.98 Hz  
 F2P: -0.500 ppm  
 F2: -250.11 Hz  
 PPMCM: 0.41667 ppm/cm  
 HZCM: 204.42502 Hz/cm

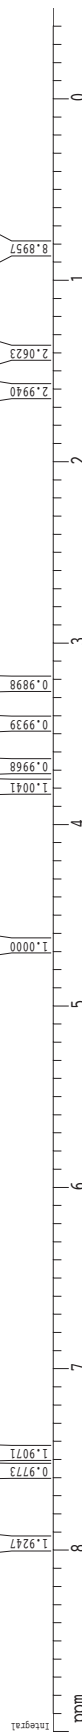

WAS-III-62-26  
 13C spectrum with 1H decoupling

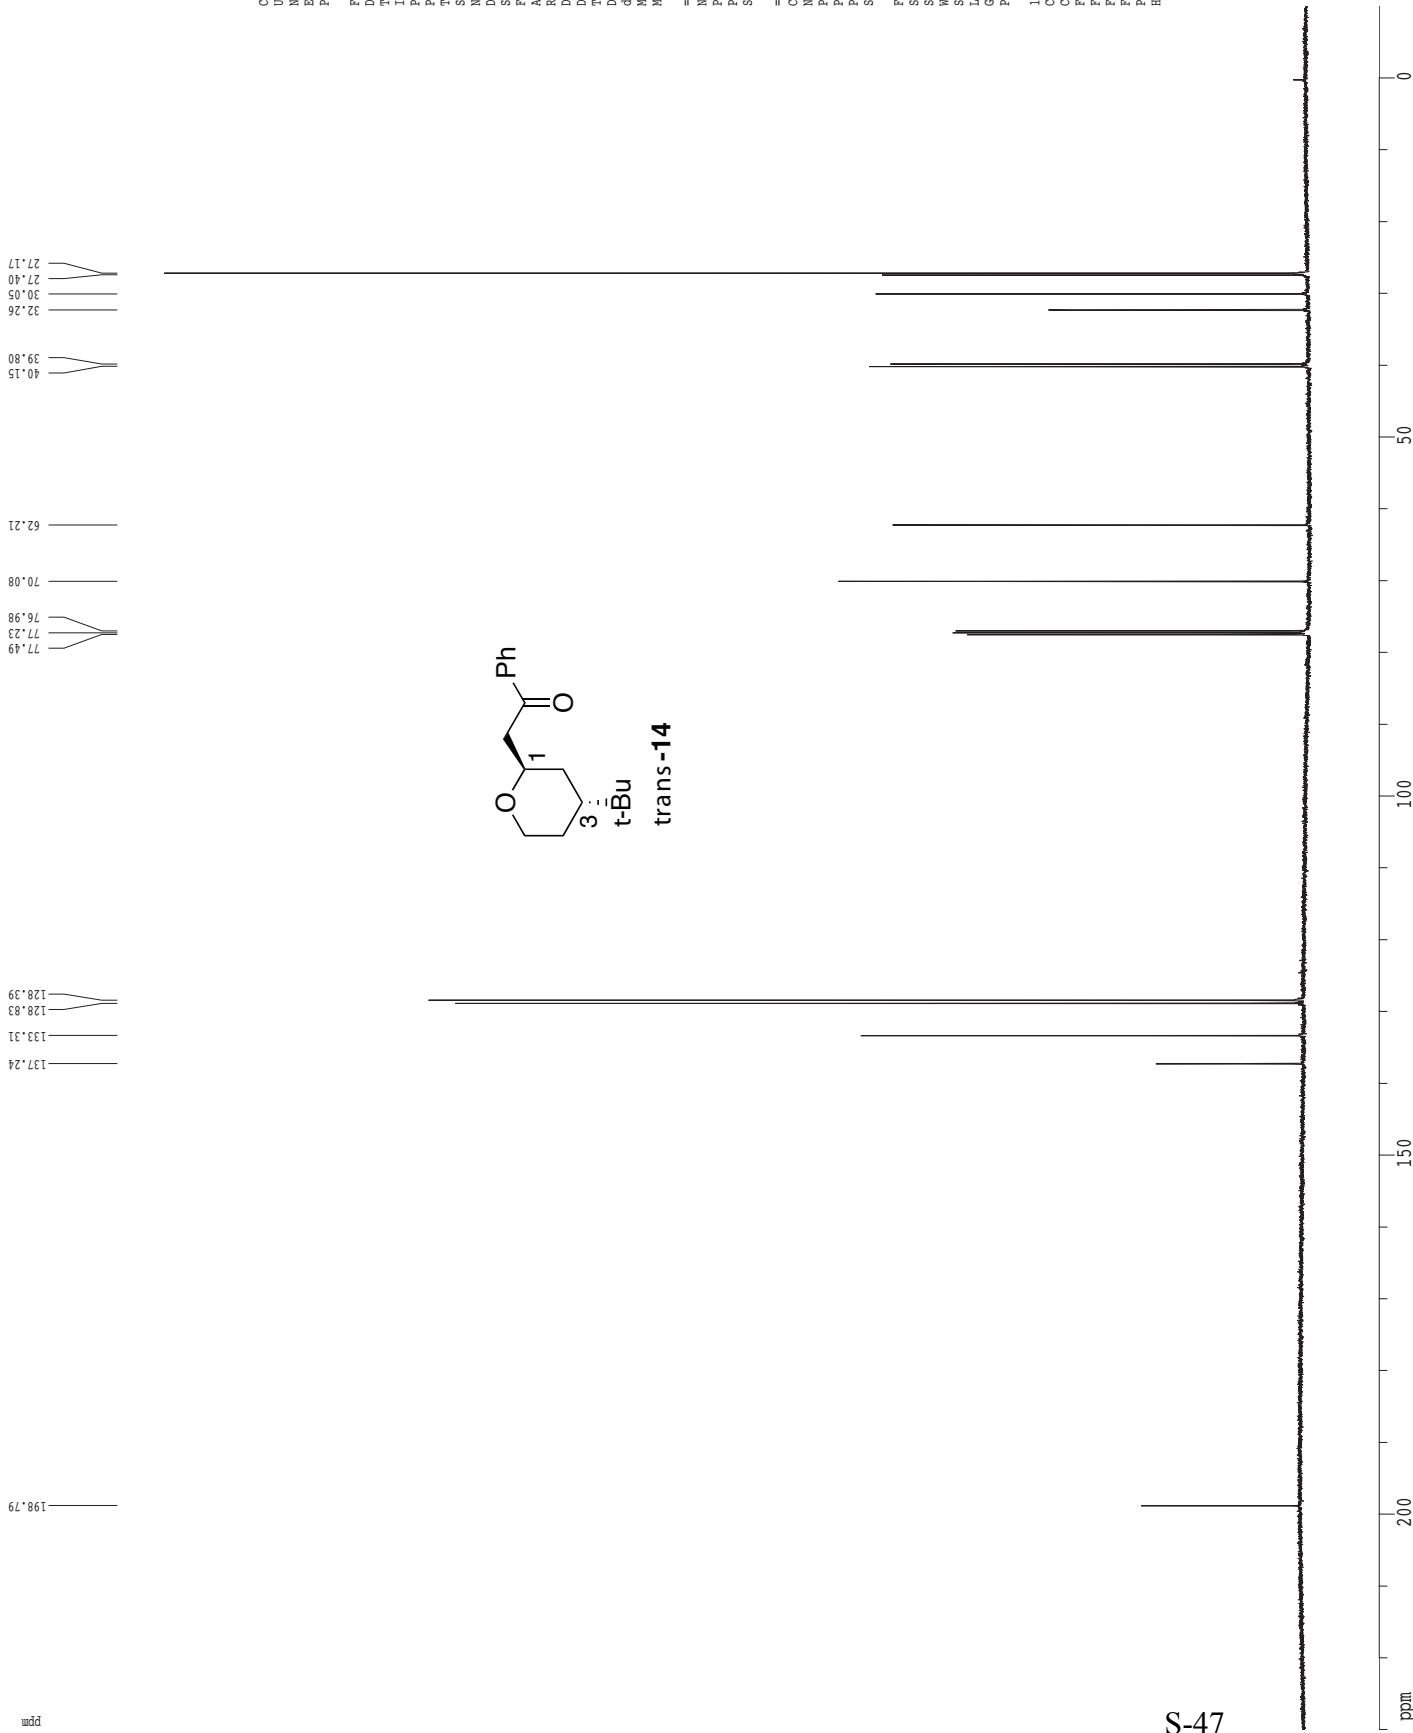

```

Current Data Parameters
USER      walter
NAME      WAS-III-62-26
EXPNO     2
PROCNO    1

F2 - Acquisition Parameters
Date_     20070222
Time      17.42
INSTRUM   cryo500
PROBHD    5 mm CPTCI LH-
PULPROG   zgpg30
TD         65536
SOLVENT   CDCl3
NS         222
DS         4
SWH        30303.00 Hz
FIDRES     0.2462388 Hz
AQ         1.0819380 sec
RG         115851.2
DW         16.500 usec
DE         6.00 usec
TE         298.0 K
D1         0.25000000 sec
d11        0.03000000 sec
MCREST    0.00000000 sec
MORPK     0.01500000 sec

===== CHANNEL f1 =====
NUC1       13C
P1         15.00 usec
PL1        -1.00 dB
SFO1       125.7942348 MHz

===== CHANNEL f2 =====
NUC2       13C
P2         15.00 usec
PL2        -1.00 dB
SFO2       125.7942348 MHz

===== CHANNEL f3 =====
NUC3       13C
P3         15.00 usec
PL3        -1.00 dB
SFO3       125.7942348 MHz

===== CHANNEL f4 =====
NUC4       13C
P4         15.00 usec
PL4        -1.00 dB
SFO4       125.7942348 MHz

===== CHANNEL f5 =====
NUC5       13C
P5         15.00 usec
PL5        -1.00 dB
SFO5       125.7942348 MHz

===== CHANNEL f6 =====
NUC6       13C
P6         15.00 usec
PL6        -1.00 dB
SFO6       125.7942348 MHz

===== CHANNEL f7 =====
NUC7       13C
P7         15.00 usec
PL7        -1.00 dB
SFO7       125.7942348 MHz

===== CHANNEL f8 =====
NUC8       13C
P8         15.00 usec
PL8        -1.00 dB
SFO8       125.7942348 MHz

===== CHANNEL f9 =====
NUC9       13C
P9         15.00 usec
PL9        -1.00 dB
SFO9       125.7942348 MHz

===== CHANNEL f10 =====
NUC10      13C
P10        15.00 usec
PL10       -1.00 dB
SFO10      125.7942348 MHz

===== CHANNEL f11 =====
NUC11      13C
P11        15.00 usec
PL11       -1.00 dB
SFO11      125.7942348 MHz

===== CHANNEL f12 =====
NUC12      13C
P12        15.00 usec
PL12       -1.00 dB
SFO12      125.7942348 MHz

===== CHANNEL f13 =====
NUC13      13C
P13        15.00 usec
PL13       -1.00 dB
SFO13      125.7942348 MHz

===== CHANNEL f14 =====
NUC14      13C
P14        15.00 usec
PL14       -1.00 dB
SFO14      125.7942348 MHz

===== CHANNEL f15 =====
NUC15      13C
P15        15.00 usec
PL15       -1.00 dB
SFO15      125.7942348 MHz

===== CHANNEL f16 =====
NUC16      13C
P16        15.00 usec
PL16       -1.00 dB
SFO16      125.7942348 MHz

===== CHANNEL f17 =====
NUC17      13C
P17        15.00 usec
PL17       -1.00 dB
SFO17      125.7942348 MHz

===== CHANNEL f18 =====
NUC18      13C
P18        15.00 usec
PL18       -1.00 dB
SFO18      125.7942348 MHz

===== CHANNEL f19 =====
NUC19      13C
P19        15.00 usec
PL19       -1.00 dB
SFO19      125.7942348 MHz

===== CHANNEL f20 =====
NUC20      13C
P20        15.00 usec
PL20       -1.00 dB
SFO20      125.7942348 MHz

===== CHANNEL f21 =====
NUC21      13C
P21        15.00 usec
PL21       -1.00 dB
SFO21      125.7942348 MHz

===== CHANNEL f22 =====
NUC22      13C
P22        15.00 usec
PL22       -1.00 dB
SFO22      125.7942348 MHz

===== CHANNEL f23 =====
NUC23      13C
P23        15.00 usec
PL23       -1.00 dB
SFO23      125.7942348 MHz

===== CHANNEL f24 =====
NUC24      13C
P24        15.00 usec
PL24       -1.00 dB
SFO24      125.7942348 MHz

===== CHANNEL f25 =====
NUC25      13C
P25        15.00 usec
PL25       -1.00 dB
SFO25      125.7942348 MHz

===== CHANNEL f26 =====
NUC26      13C
P26        15.00 usec
PL26       -1.00 dB
SFO26      125.7942348 MHz

===== CHANNEL f27 =====
NUC27      13C
P27        15.00 usec
PL27       -1.00 dB
SFO27      125.7942348 MHz

===== CHANNEL f28 =====
NUC28      13C
P28        15.00 usec
PL28       -1.00 dB
SFO28      125.7942348 MHz

===== CHANNEL f29 =====
NUC29      13C
P29        15.00 usec
PL29       -1.00 dB
SFO29      125.7942348 MHz

===== CHANNEL f30 =====
NUC30      13C
P30        15.00 usec
PL30       -1.00 dB
SFO30      125.7942348 MHz

===== CHANNEL f31 =====
NUC31      13C
P31        15.00 usec
PL31       -1.00 dB
SFO31      125.7942348 MHz

===== CHANNEL f32 =====
NUC32      13C
P32        15.00 usec
PL32       -1.00 dB
SFO32      125.7942348 MHz

===== CHANNEL f33 =====
NUC33      13C
P33        15.00 usec
PL33       -1.00 dB
SFO33      125.7942348 MHz

===== CHANNEL f34 =====
NUC34      13C
P34        15.00 usec
PL34       -1.00 dB
SFO34      125.7942348 MHz

===== CHANNEL f35 =====
NUC35      13C
P35        15.00 usec
PL35       -1.00 dB
SFO35      125.7942348 MHz

===== CHANNEL f36 =====
NUC36      13C
P36        15.00 usec
PL36       -1.00 dB
SFO36      125.7942348 MHz

===== CHANNEL f37 =====
NUC37      13C
P37        15.00 usec
PL37       -1.00 dB
SFO37      125.7942348 MHz

===== CHANNEL f38 =====
NUC38      13C
P38        15.00 usec
PL38       -1.00 dB
SFO38      125.7942348 MHz

===== CHANNEL f39 =====
NUC39      13C
P39        15.00 usec
PL39       -1.00 dB
SFO39      125.7942348 MHz

===== CHANNEL f40 =====
NUC40      13C
P40        15.00 usec
PL40       -1.00 dB
SFO40      125.7942348 MHz

===== CHANNEL f41 =====
NUC41      13C
P41        15.00 usec
PL41       -1.00 dB
SFO41      125.7942348 MHz

===== CHANNEL f42 =====
NUC42      13C
P42        15.00 usec
PL42       -1.00 dB
SFO42      125.7942348 MHz

===== CHANNEL f43 =====
NUC43      13C
P43        15.00 usec
PL43       -1.00 dB
SFO43      125.7942348 MHz

===== CHANNEL f44 =====
NUC44      13C
P44        15.00 usec
PL44       -1.00 dB
SFO44      125.7942348 MHz

===== CHANNEL f45 =====
NUC45      13C
P45        15.00 usec
PL45       -1.00 dB
SFO45      125.7942348 MHz

===== CHANNEL f46 =====
NUC46      13C
P46        15.00 usec
PL46       -1.00 dB
SFO46      125.7942348 MHz

===== CHANNEL f47 =====
NUC47      13C
P47        15.00 usec
PL47       -1.00 dB
SFO47      125.7942348 MHz

===== CHANNEL f48 =====
NUC48      13C
P48        15.00 usec
PL48       -1.00 dB
SFO48      125.7942348 MHz

===== CHANNEL f49 =====
NUC49      13C
P49        15.00 usec
PL49       -1.00 dB
SFO49      125.7942348 MHz

===== CHANNEL f50 =====
NUC50      13C
P50        15.00 usec
PL50       -1.00 dB
SFO50      125.7942348 MHz

===== CHANNEL f51 =====
NUC51      13C
P51        15.00 usec
PL51       -1.00 dB
SFO51      125.7942348 MHz

===== CHANNEL f52 =====
NUC52      13C
P52        15.00 usec
PL52       -1.00 dB
SFO52      125.7942348 MHz

===== CHANNEL f53 =====
NUC53      13C
P53        15.00 usec
PL53       -1.00 dB
SFO53      125.7942348 MHz

===== CHANNEL f54 =====
NUC54      13C
P54        15.00 usec
PL54       -1.00 dB
SFO54      125.7942348 MHz

===== CHANNEL f55 =====
NUC55      13C
P55        15.00 usec
PL55       -1.00 dB
SFO55      125.7942348 MHz

===== CHANNEL f56 =====
NUC56      13C
P56        15.00 usec
PL56       -1.00 dB
SFO56      125.7942348 MHz

===== CHANNEL f57 =====
NUC57      13C
P57        15.00 usec
PL57       -1.00 dB
SFO57      125.7942348 MHz

===== CHANNEL f58 =====
NUC58      13C
P58        15.00 usec
PL58       -1.00 dB
SFO58      125.7942348 MHz

===== CHANNEL f59 =====
NUC59      13C
P59        15.00 usec
PL59       -1.00 dB
SFO59      125.7942348 MHz

===== CHANNEL f60 =====
NUC60      13C
P60        15.00 usec
PL60       -1.00 dB
SFO60      125.7942348 MHz

===== CHANNEL f61 =====
NUC61      13C
P61        15.00 usec
PL61       -1.00 dB
SFO61      125.7942348 MHz

===== CHANNEL f62 =====
NUC62      13C
P62        15.00 usec
PL62       -1.00 dB
SFO62      125.7942348 MHz

===== CHANNEL f63 =====
NUC63      13C
P63        15.00 usec
PL63       -1.00 dB
SFO63      125.7942348 MHz

===== CHANNEL f64 =====
NUC64      13C
P64        15.00 usec
PL64       -1.00 dB
SFO64      125.7942348 MHz

===== CHANNEL f65 =====
NUC65      13C
P65        15.00 usec
PL65       -1.00 dB
SFO65      125.7942348 MHz

===== CHANNEL f66 =====
NUC66      13C
P66        15.00 usec
PL66       -1.00 dB
SFO66      125.7942348 MHz

===== CHANNEL f67 =====
NUC67      13C
P67        15.00 usec
PL67       -1.00 dB
SFO67      125.7942348 MHz

===== CHANNEL f68 =====
NUC68      13C
P68        15.00 usec
PL68       -1.00 dB
SFO68      125.7942348 MHz

===== CHANNEL f69 =====
NUC69      13C
P69        15.00 usec
PL69       -1.00 dB
SFO69      125.7942348 MHz

===== CHANNEL f70 =====
NUC70      13C
P70        15.00 usec
PL70       -1.00 dB
SFO70      125.7942348 MHz

===== CHANNEL f71 =====
NUC71      13C
P71        15.00 usec
PL71       -1.00 dB
SFO71      125.7942348 MHz

===== CHANNEL f72 =====
NUC72      13C
P72        15.00 usec
PL72       -1.00 dB
SFO72      125.7942348 MHz

===== CHANNEL f73 =====
NUC73      13C
P73        15.00 usec
PL73       -1.00 dB
SFO73      125.7942348 MHz

===== CHANNEL f74 =====
NUC74      13C
P74        15.00 usec
PL74       -1.00 dB
SFO74      125.7942348 MHz

===== CHANNEL f75 =====
NUC75      13C
P75        15.00 usec
PL75       -1.00 dB
SFO75      125.7942348 MHz

===== CHANNEL f76 =====
NUC76      13C
P76        15.00 usec
PL76       -1.00 dB
SFO76      125.7942348 MHz

===== CHANNEL f77 =====
NUC77      13C
P77        15.00 usec
PL77       -1.00 dB
SFO77      125.7942348 MHz

===== CHANNEL f78 =====
NUC78      13C
P78        15.00 usec
PL78       -1.00 dB
SFO78      125.7942348 MHz

===== CHANNEL f79 =====
NUC79      13C
P79        15.00 usec
PL79       -1.00 dB
SFO79      125.7942348 MHz

===== CHANNEL f80 =====
NUC80      13C
P80        15.00 usec
PL80       -1.00 dB
SFO80      125.7942348 MHz

===== CHANNEL f81 =====
NUC81      13C
P81        15.00 usec
PL81       -1.00 dB
SFO81      125.7942348 MHz

===== CHANNEL f82 =====
NUC82      13C
P82        15.00 usec
PL82       -1.00 dB
SFO82      125.7942348 MHz

===== CHANNEL f83 =====
NUC83      13C
P83        15.00 usec
PL83       -1.00 dB
SFO83      125.7942348 MHz

===== CHANNEL f84 =====
NUC84      13C
P84        15.00 usec
PL84       -1.00 dB
SFO84      125.7942348 MHz

===== CHANNEL f85 =====
NUC85      13C
P85        15.00 usec
PL85       -1.00 dB
SFO85      125.7942348 MHz

===== CHANNEL f86 =====
NUC86      13C
P86        15.00 usec
PL86       -1.00 dB
SFO86      125.7942348 MHz

===== CHANNEL f87 =====
NUC87      13C
P87        15.00 usec
PL87       -1.00 dB
SFO87      125.7942348 MHz

===== CHANNEL f88 =====
NUC88      13C
P88        15.00 usec
PL88       -1.00 dB
SFO88      125.7942348 MHz

===== CHANNEL f89 =====
NUC89      13C
P89        15.00 usec
PL89       -1.00 dB
SFO89      125.7942348 MHz

===== CHANNEL f90 =====
NUC90      13C
P90        15.00 usec
PL90       -1.00 dB
SFO90      125.7942348 MHz

===== CHANNEL f91 =====
NUC91      13C
P91        15.00 usec
PL91       -1.00 dB
SFO91      125.7942348 MHz

===== CHANNEL f92 =====
NUC92      13C
P92        15.00 usec
PL92       -1.00 dB
SFO92      125.7942348 MHz

===== CHANNEL f93 =====
NUC93      13C
P93        15.00 usec
PL93       -1.00 dB
SFO93      125.7942348 MHz

===== CHANNEL f94 =====
NUC94      13C
P94        15.00 usec
PL94       -1.00 dB
SFO94      125.7942348 MHz

===== CHANNEL f95 =====
NUC95      13C
P95        15.00 usec
PL95       -1.00 dB
SFO95      125.7942348 MHz

===== CHANNEL f96 =====
NUC96      13C
P96        15.00 usec
PL96       -1.00 dB
SFO96      125.7942348 MHz

===== CHANNEL f97 =====
NUC97      13C
P97        15.00 usec
PL97       -1.00 dB
SFO97      125.7942348 MHz

===== CHANNEL f98 =====
NUC98      13C
P98        15.00 usec
PL98       -1.00 dB
SFO98      125.7942348 MHz

===== CHANNEL f99 =====
NUC99      13C
P99        15.00 usec
PL99       -1.00 dB
SFO99      125.7942348 MHz

===== CHANNEL f100 =====
NUC100     13C
P100       15.00 usec
PL100      -1.00 dB
SFO100     125.7942348 MHz
  
```

WAS-III-59-27  
1H spectrum

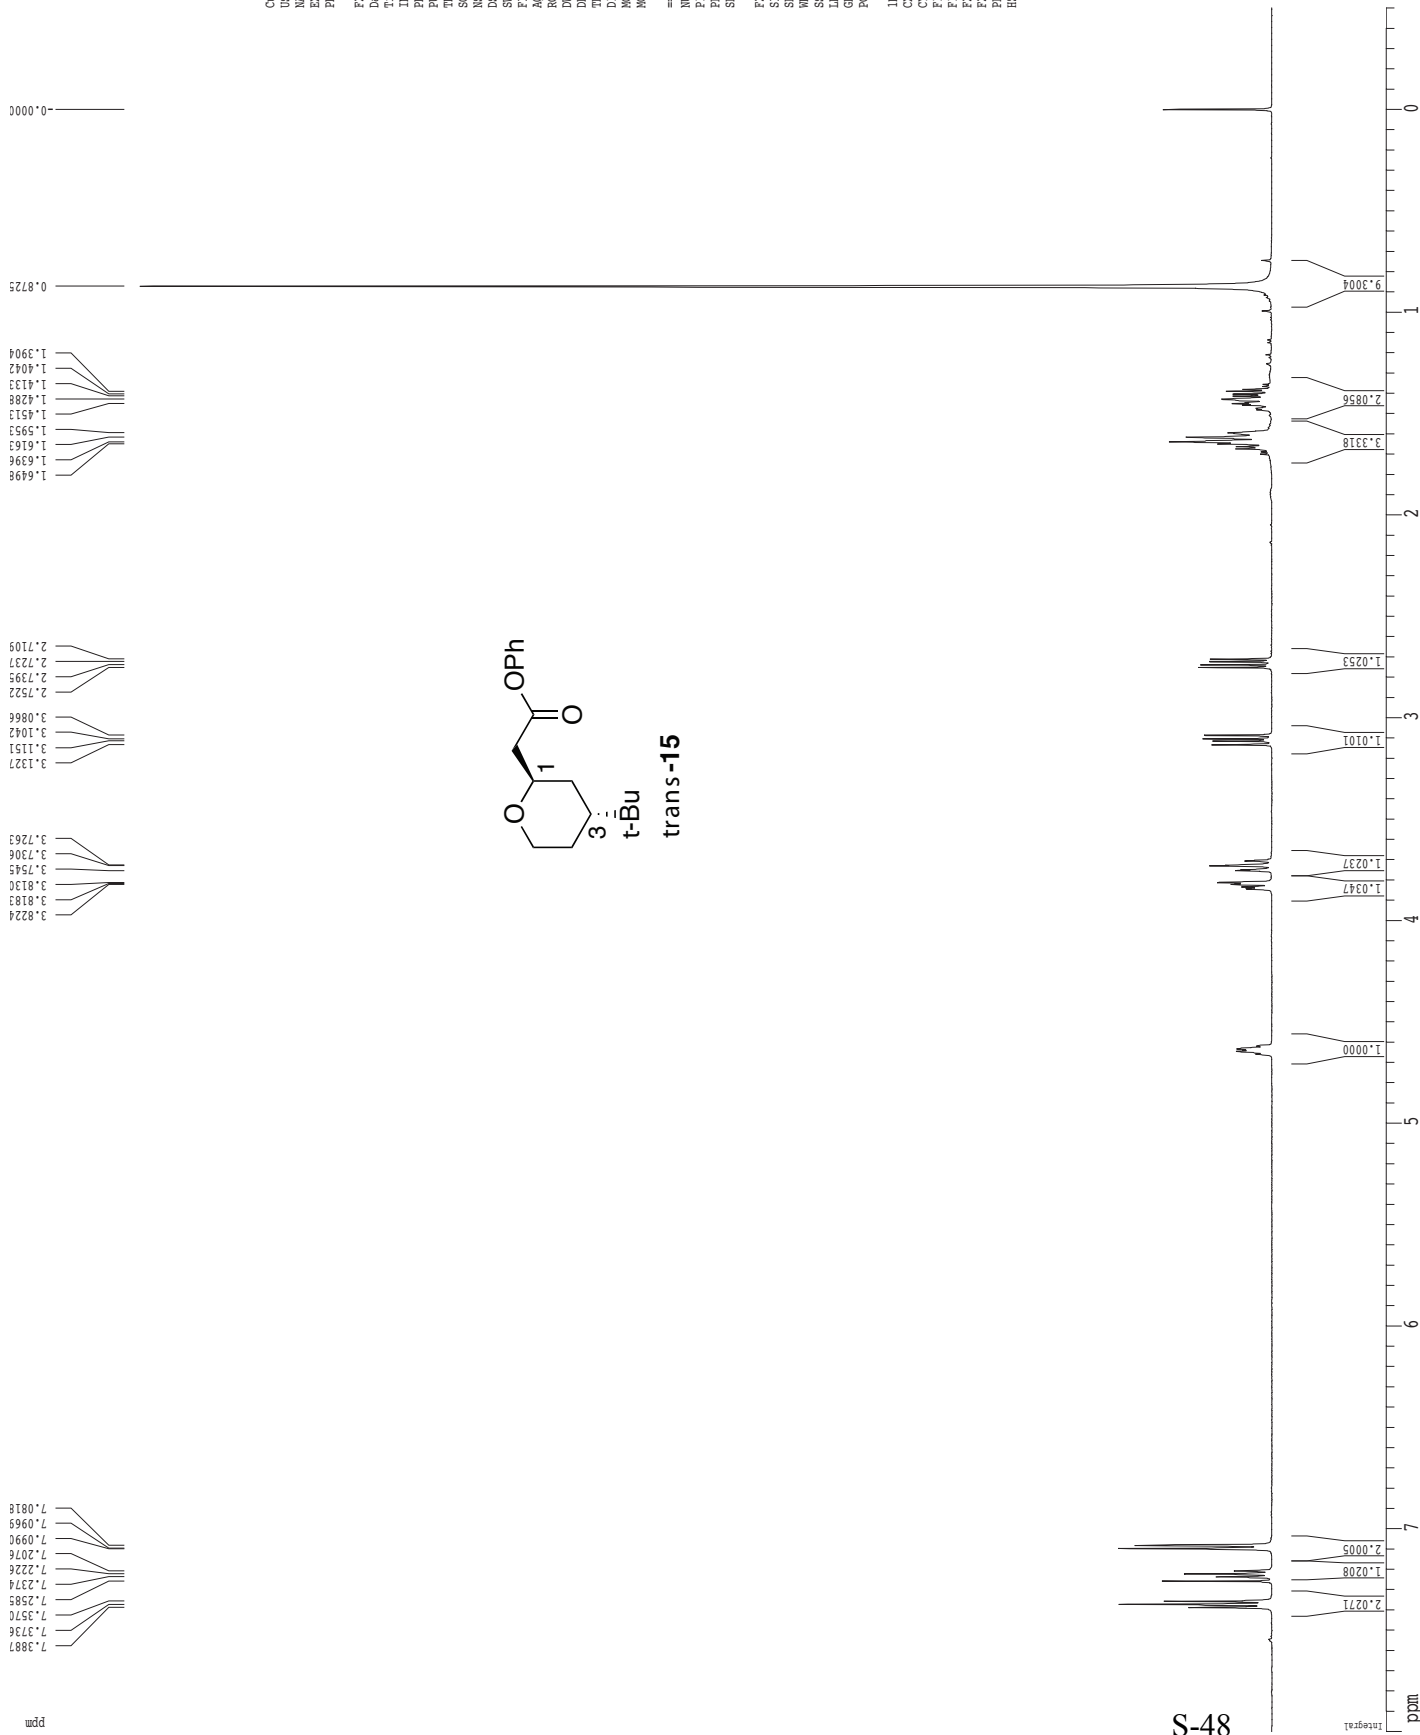

Current Data Parameters  
 USER walter  
 NAME WAS-III-59-27  
 EXPNO 3  
 PROCNO 1

F2 - Acquisition Parameters  
 Date\_ 20070213  
 Time 9.11  
 INSTRUM cryo500  
 PROBDH 5 mm CPCLP 1H-  
 PULPROG zgpg30  
 SOLVENT CDCl3  
 NS 8  
 DS 0  
 SWH 8012.820 Hz  
 FIDRES 0.098043 Hz  
 AQ 5.0998774 sec  
 RG 4.5  
 DW 62.400 usec  
 DE 6.00 usec  
 TE 298.0 K  
 D1 0.1000000 sec  
 ACRESF 0.0000000 sec  
 ACPRR 0.0100000 sec

==== CHANNEL f1 =====  
 NUCL1 1H  
 P1 8.00 usec  
 PL1 1.60 dB  
 SFO1 500.2235015 MHz

F2 - Processing parameters  
 SI 65536  
 SF 500.2200331 MHz  
 WDW EN  
 SSB 0  
 LB 0.20 Hz  
 GB 0  
 PC 4.00

ID NMR plot parameters  
 CX 22.80 cm  
 CY 15.00 cm  
 FIP 8.000 ppm  
 F1 4001.76 Hz  
 F2P -0.500 ppm  
 F2 -250.11 Hz  
 PPMCM 0.37281 ppm/cm  
 HZCM 186.49555 Hz/cm



WAS-III-59-27  
 13C spectrum with 1H decoupling

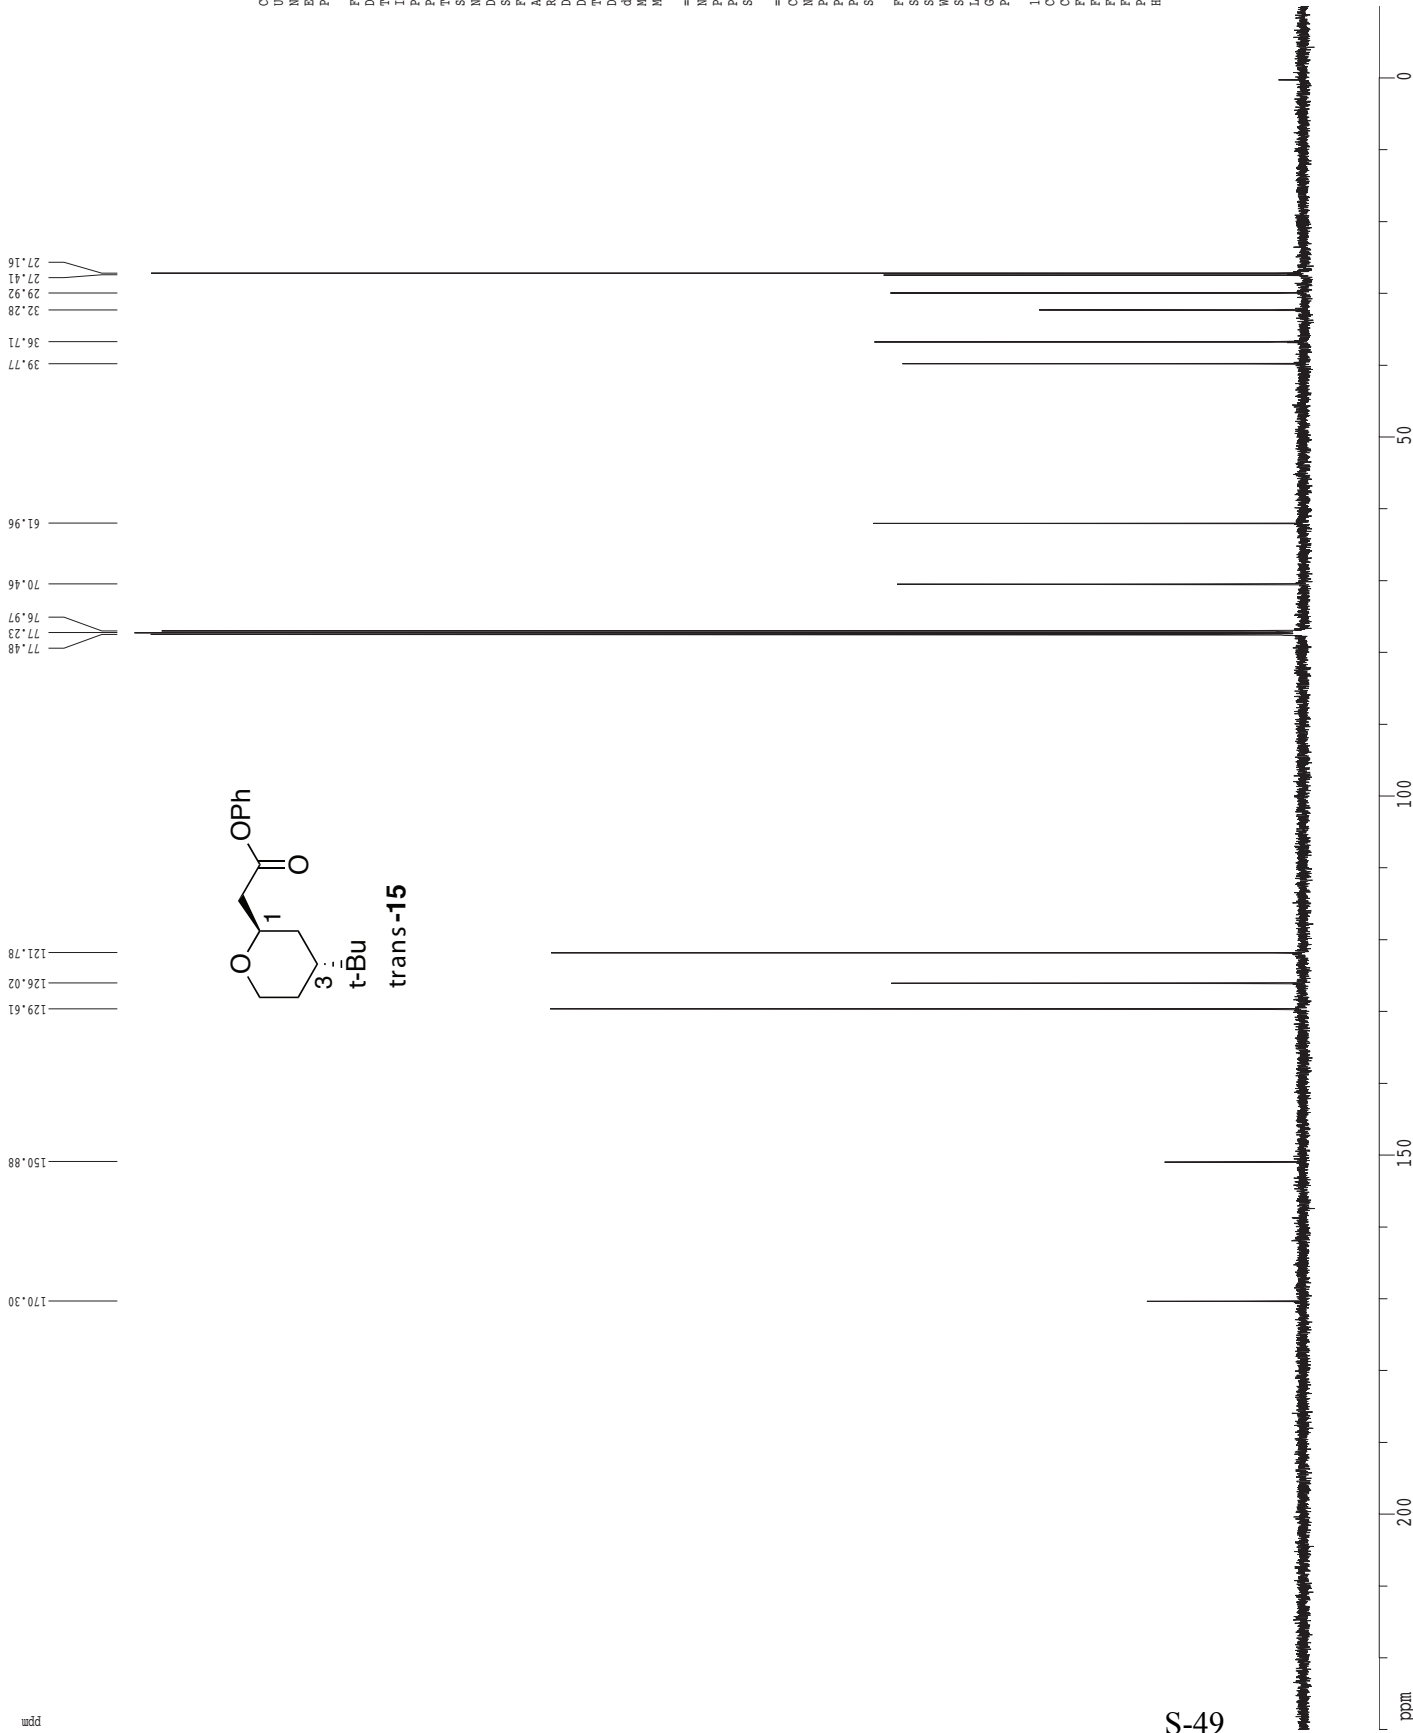

Current Data Parameters  
 USER walter  
 NAME WAS-III-59-27  
 EXPNO 5  
 PROCNO 1

F2 - Acquisition Parameters  
 Date\_ 20070213  
 Time 9.14  
 INSTRUM cryo500  
 PROBHD 5 mm CPTCI LH-  
 PULPROG zgpg30  
 TD 65418  
 SOLVENT CDCl3  
 NS 94  
 DS 4  
 SWH 30303.00 Hz  
 FWHZ 0.64222 Hz  
 AQ 1.0794470 sec  
 RG 130004  
 DW 16.500 usec  
 DE 6.00 usec  
 TE 298.0 K  
 D1 0.25000000 sec  
 d11 0.03000000 sec  
 MCREST 0.00000000 sec  
 MONRK 0.01500000 sec

===== CHANNEL f1 =====  
 NUC1 13C  
 P1 15.00 usec  
 PL1 -1.00 dB  
 SFO1 125.7942348 MHz

===== CHANNEL f2 =====  
 CUPRG2 waltz16  
 NUC2 1H  
 P2 100.00 usec  
 PL2 1.60 dB  
 PL12 23.54 dB  
 SFO2 500.2225011 MHz

F2 - Processing parameters  
 SI 65536  
 SF 125.784020 MHz  
 WDW EM  
 SSB 0  
 LB 1.00 Hz  
 GB 0  
 PC 2.00

ID NMR plot parameters  
 X 72.50 cm  
 Y 11.00 cm  
 F1 230.000 ppm  
 F2 28929.49 Hz  
 F3 -10.000 ppm  
 F4 -1257.80 Hz  
 PPMCM 10.52632 ppm/cm  
 HZCM 1324.00427 Hz/cm

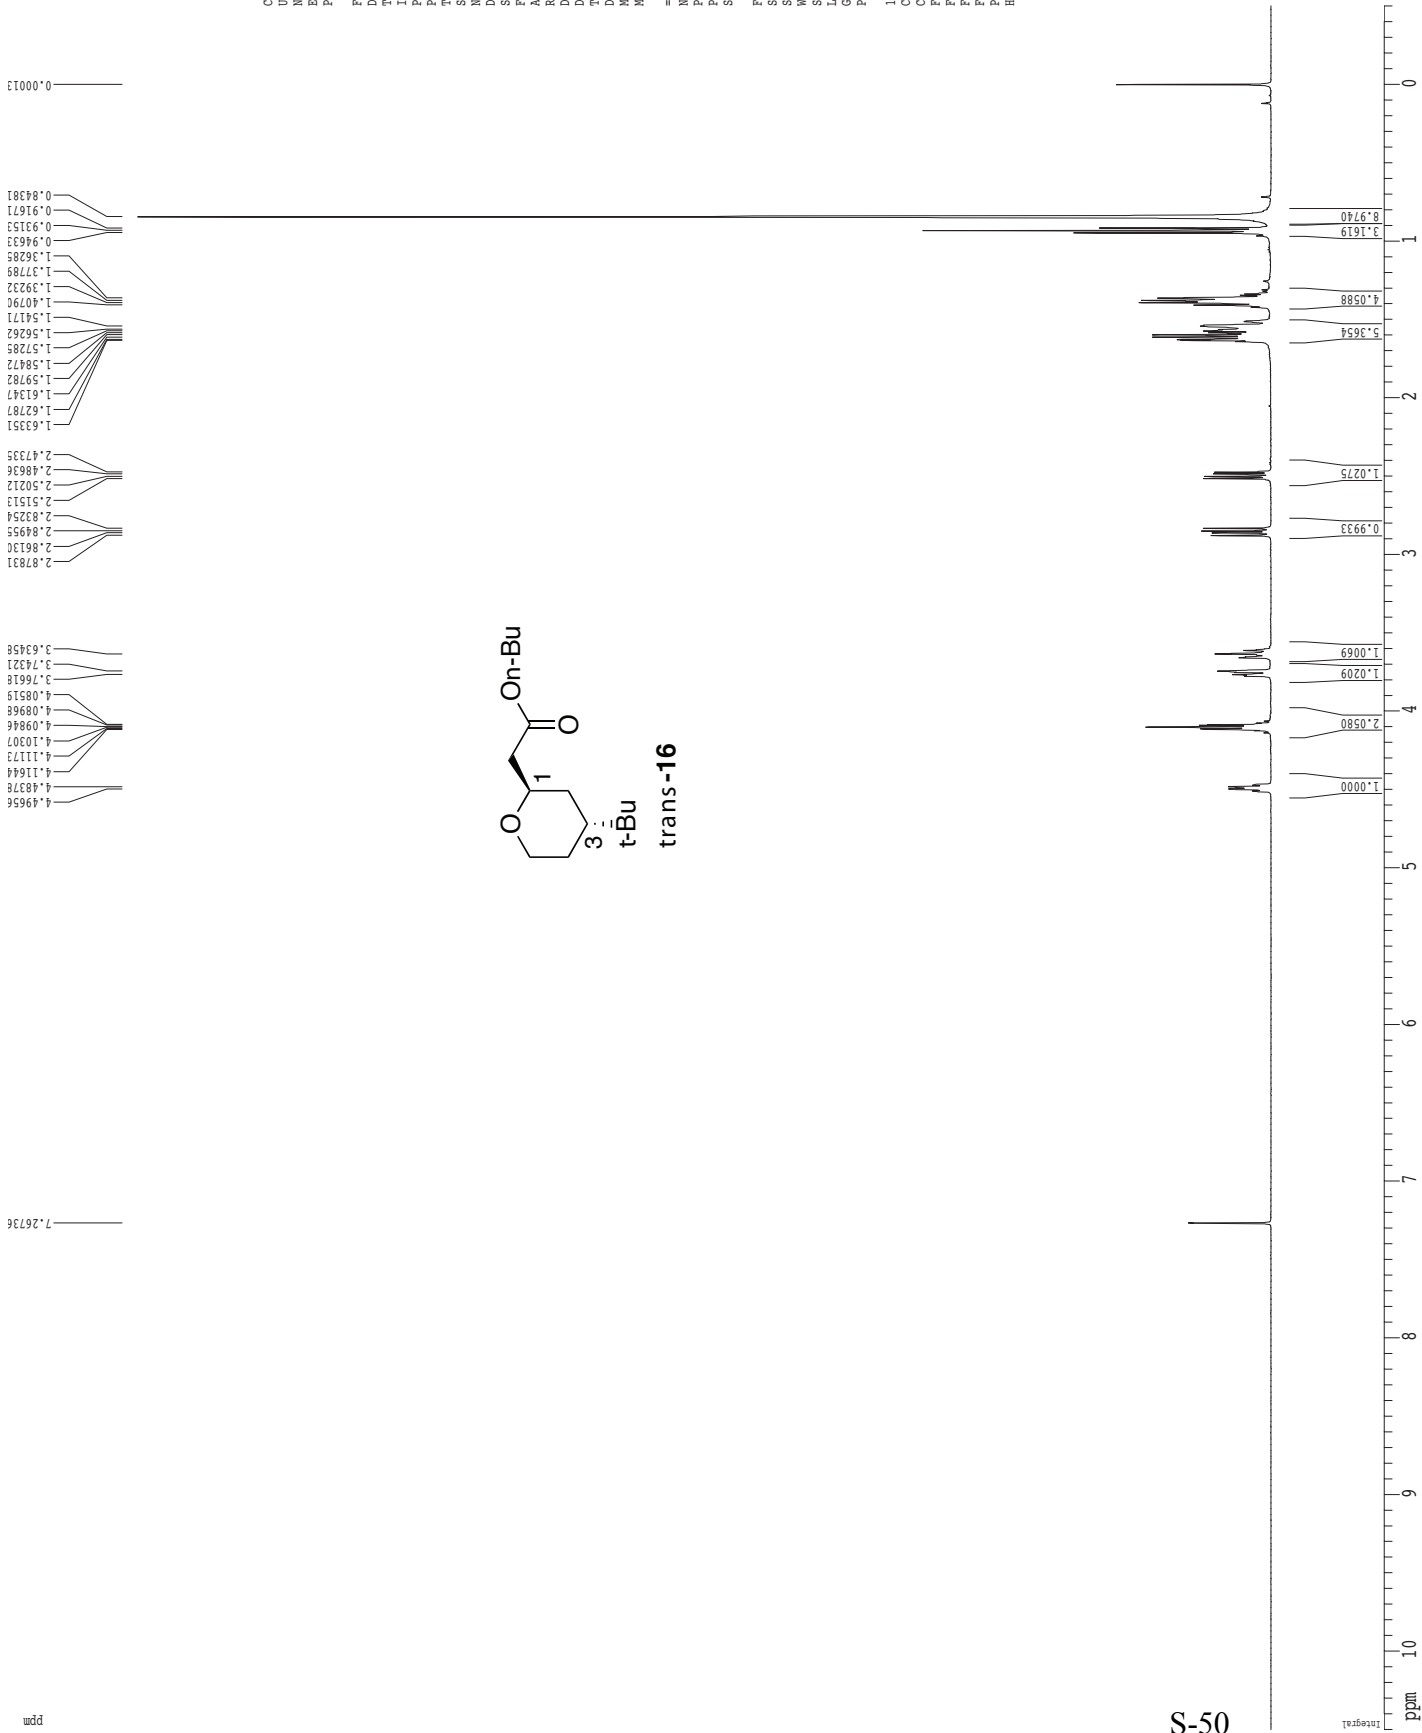

WAS-III-166-27  
 13C spectrum with 1H decoupling

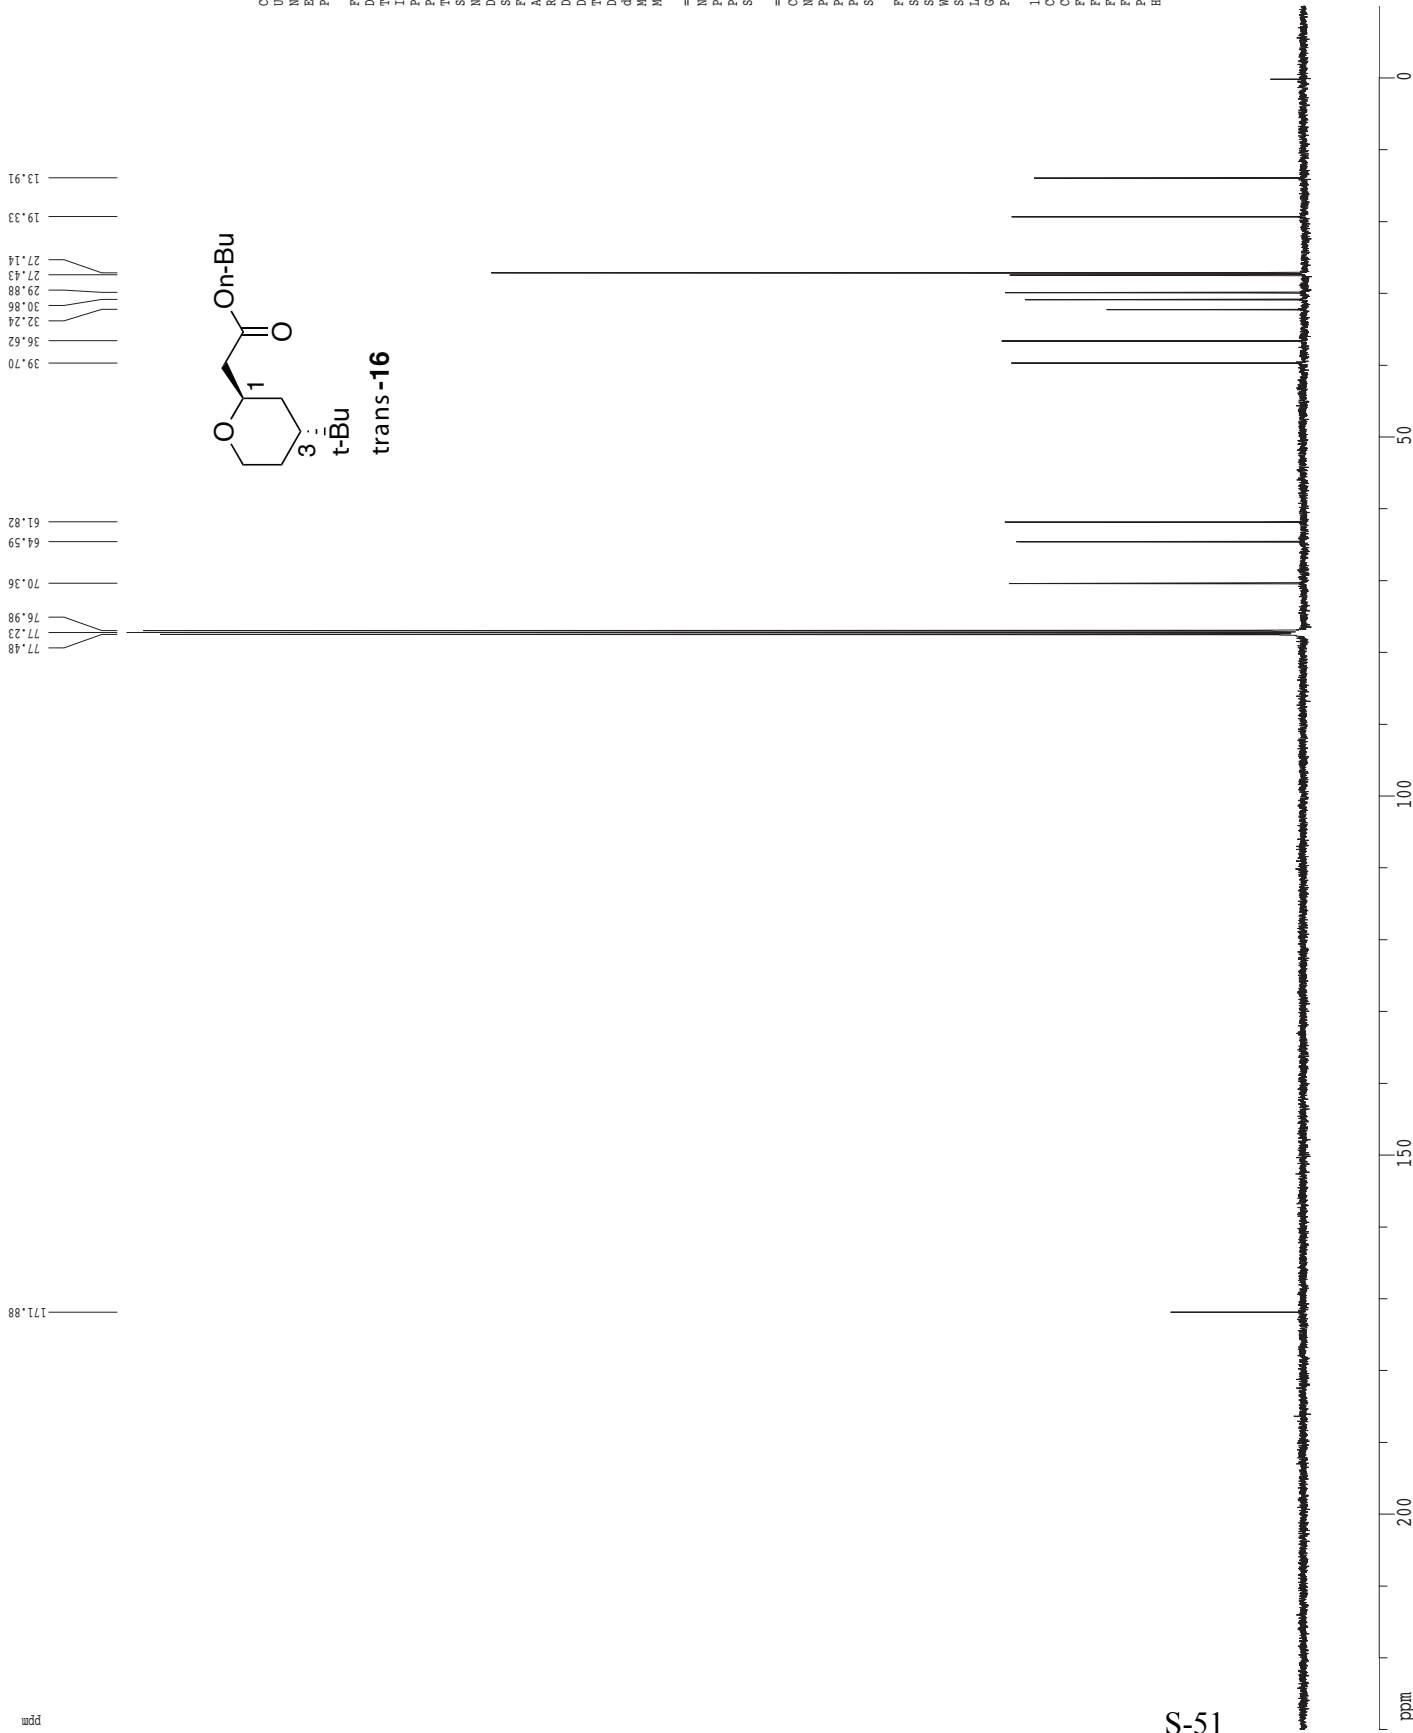

Current Data Parameters  
 USER walter  
 NAME WAS-III-166-27  
 EXPNO 2  
 PROCNO 1

F2 - Acquisition Parameters  
 Date\_ 20071002  
 Time 16.51  
 INSTRUM cryo500  
 PROBDH 5 mm CPTCI LH-  
 PULPROG zgpg30  
 TD 65418  
 SOLVENT CDCl3T  
 NS 179  
 DS 30003.00 Hz  
 SFO1 125.761322 Hz  
 AQ 1.0794655 sec  
 RG 130004  
 DW 16.500 usec  
 DE 6.00 usec  
 TE 298.0 K  
 D1 0.25000000 sec  
 d11 0.03000000 sec  
 MCREST 0.00000000 sec  
 MONRK 0.01500000 sec

===== CHANNEL f1 =====  
 NUC1 13C  
 P1 15.00 usec  
 PL1 -1.00 dB  
 SFO1 125.761322 MHz

===== CHANNEL f2 =====  
 CPDPRG2 waltz16  
 NUC2 1H  
 PCPD2 100.00 usec  
 PL2 -1.60 dB  
 PL12 23.54 dB  
 SFO2 500.2225011 MHz

F2 - Processing parameters  
 SI 65536  
 SF 125.761322 MHz  
 WDW EM  
 SSB 0  
 LB 1.00 Hz  
 GB 0  
 PC 2.00

1D NMR plot parameters  
 X 72.80 cm  
 Y 1.00 cm  
 Z 230.000 ppm  
 F1 28929.49 Hz  
 F2 -10.000 ppm  
 F2 -1257.80 Hz  
 PRCM 10.52632 ppm/cm  
 HZCM 1324.00415 Hz/cm

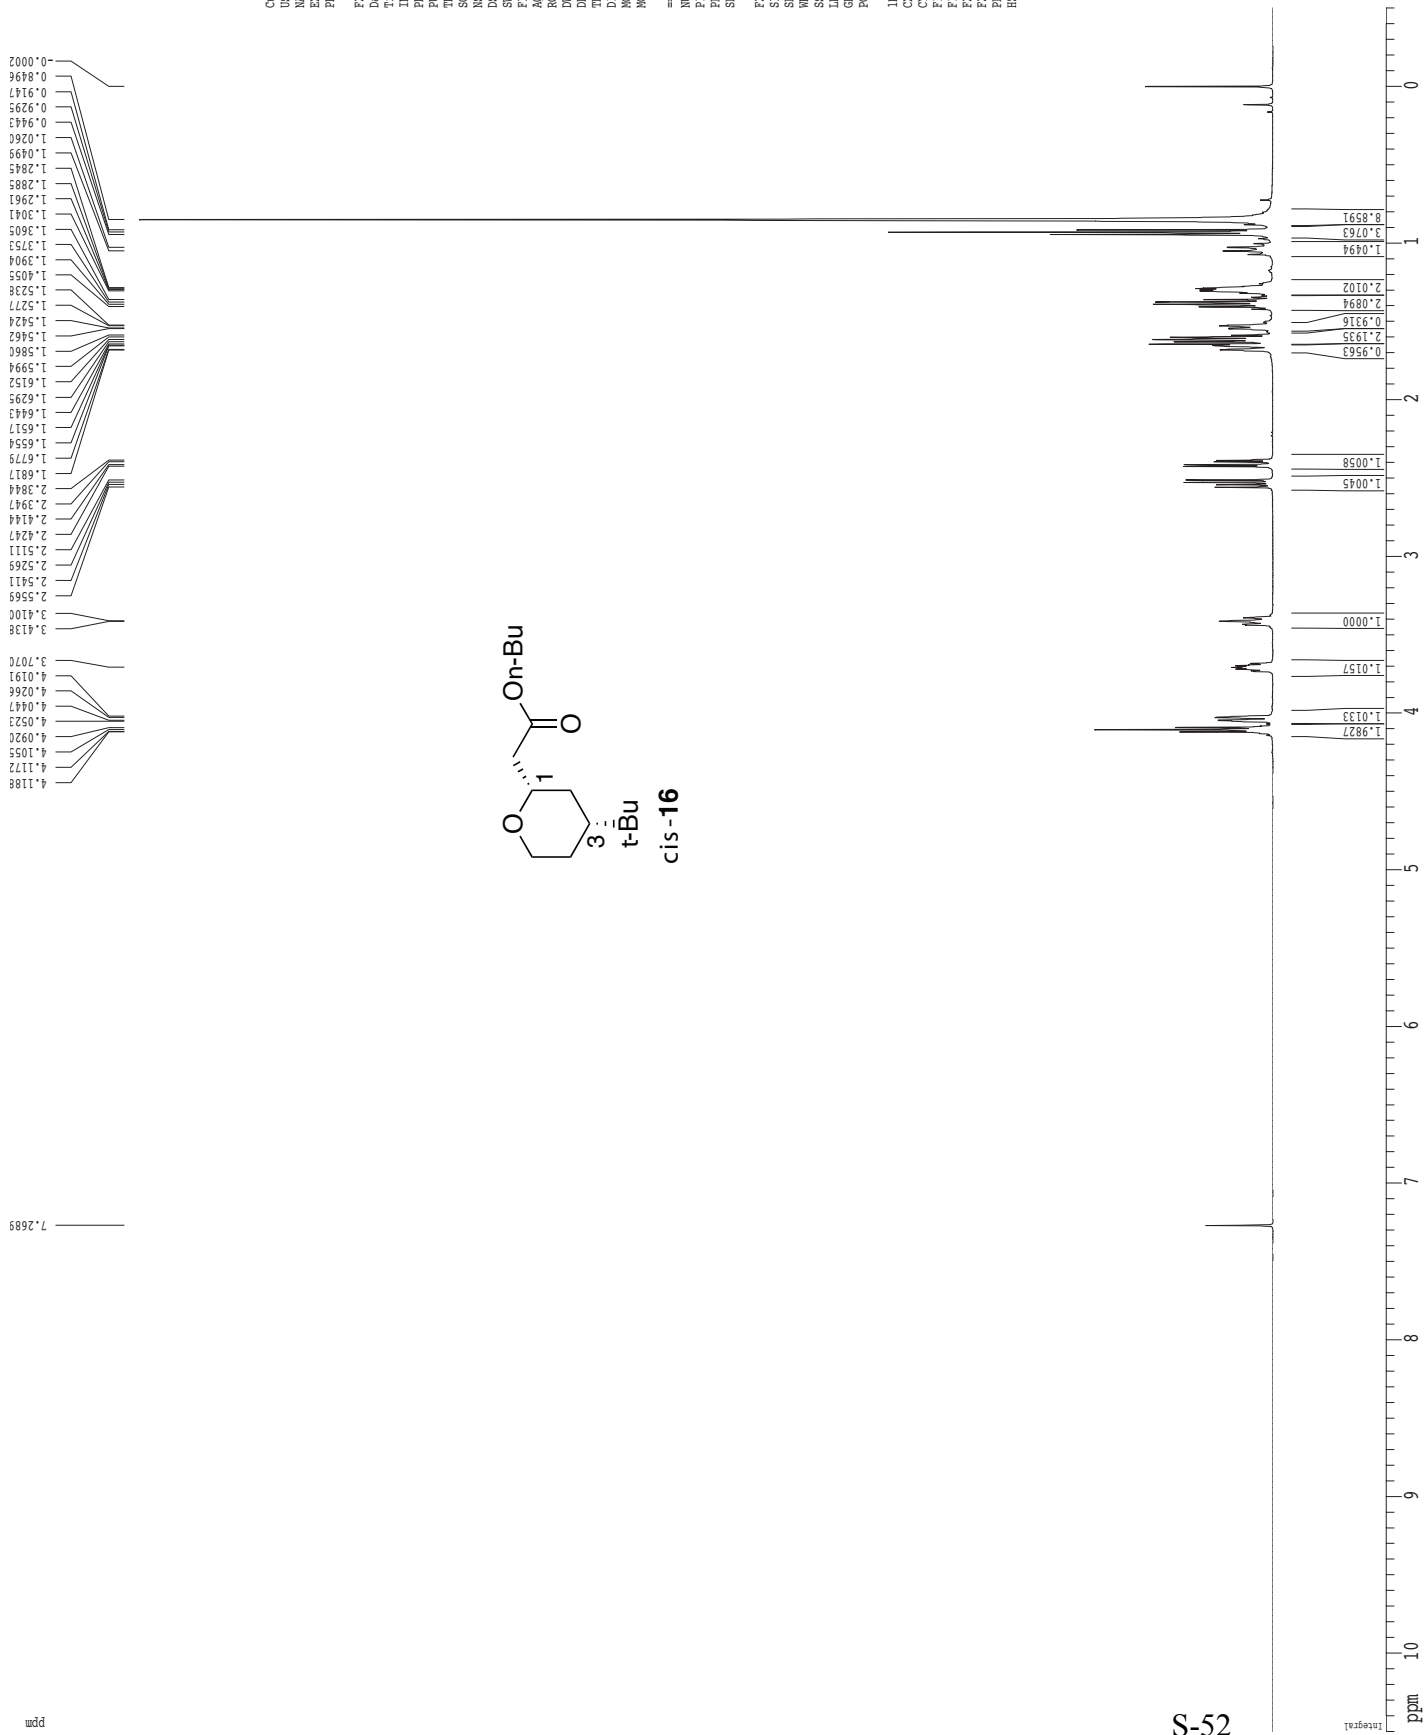

Current Data Parameters  
 USER: walter  
 NAME: WAS-III-166-26  
 EXPNO: 5  
 PROCNO: 1

F2 - Acquisition Parameters  
 Date\_: 20071002  
 Time: 23.07  
 INSTRUM: cryo500  
 PROBD: 5 mm CPXI IH-  
 PULPROG: zgpg30  
 SOLVENT: CDCl3  
 NS: 8  
 DS: 0  
 SWH: 8012.820 Hz  
 FIDRES: 0.098043 Hz  
 AQ: 5.0999398 sec  
 RG: 4.5  
 DW: 62.400 usec  
 DE: 6.00 usec  
 TE: 298.0 K  
 D1: 0.10000000 sec  
 ACRESF: 0.00000000 sec  
 ACPRR: 0.01500000 sec

==== CHANNEL f1 =====  
 NU1: 1H  
 P1: 8.00 usec  
 PL1: 1.60 dB  
 SFO1: 500.2235015 MHz

F2 - Processing parameters  
 SI: 65536  
 SF: 500.2200266 MHz  
 WDW: EN  
 SSB: 0  
 LB: 0.20 Hz  
 GB: 0  
 PC: 4.00

ID NMR plot parameters  
 CX: 22.80 cm  
 CY: 15.00 cm  
 F1P: 10.500 ppm  
 F1: 5252.31 Hz  
 F2P: -0.500 ppm  
 F2: -250.11 Hz  
 PPMCM: 0.48246 ppm/cm  
 HZCM: 241.33423 Hz/cm

WAS-III-166-26  
 13C spectrum with 1H decoupling

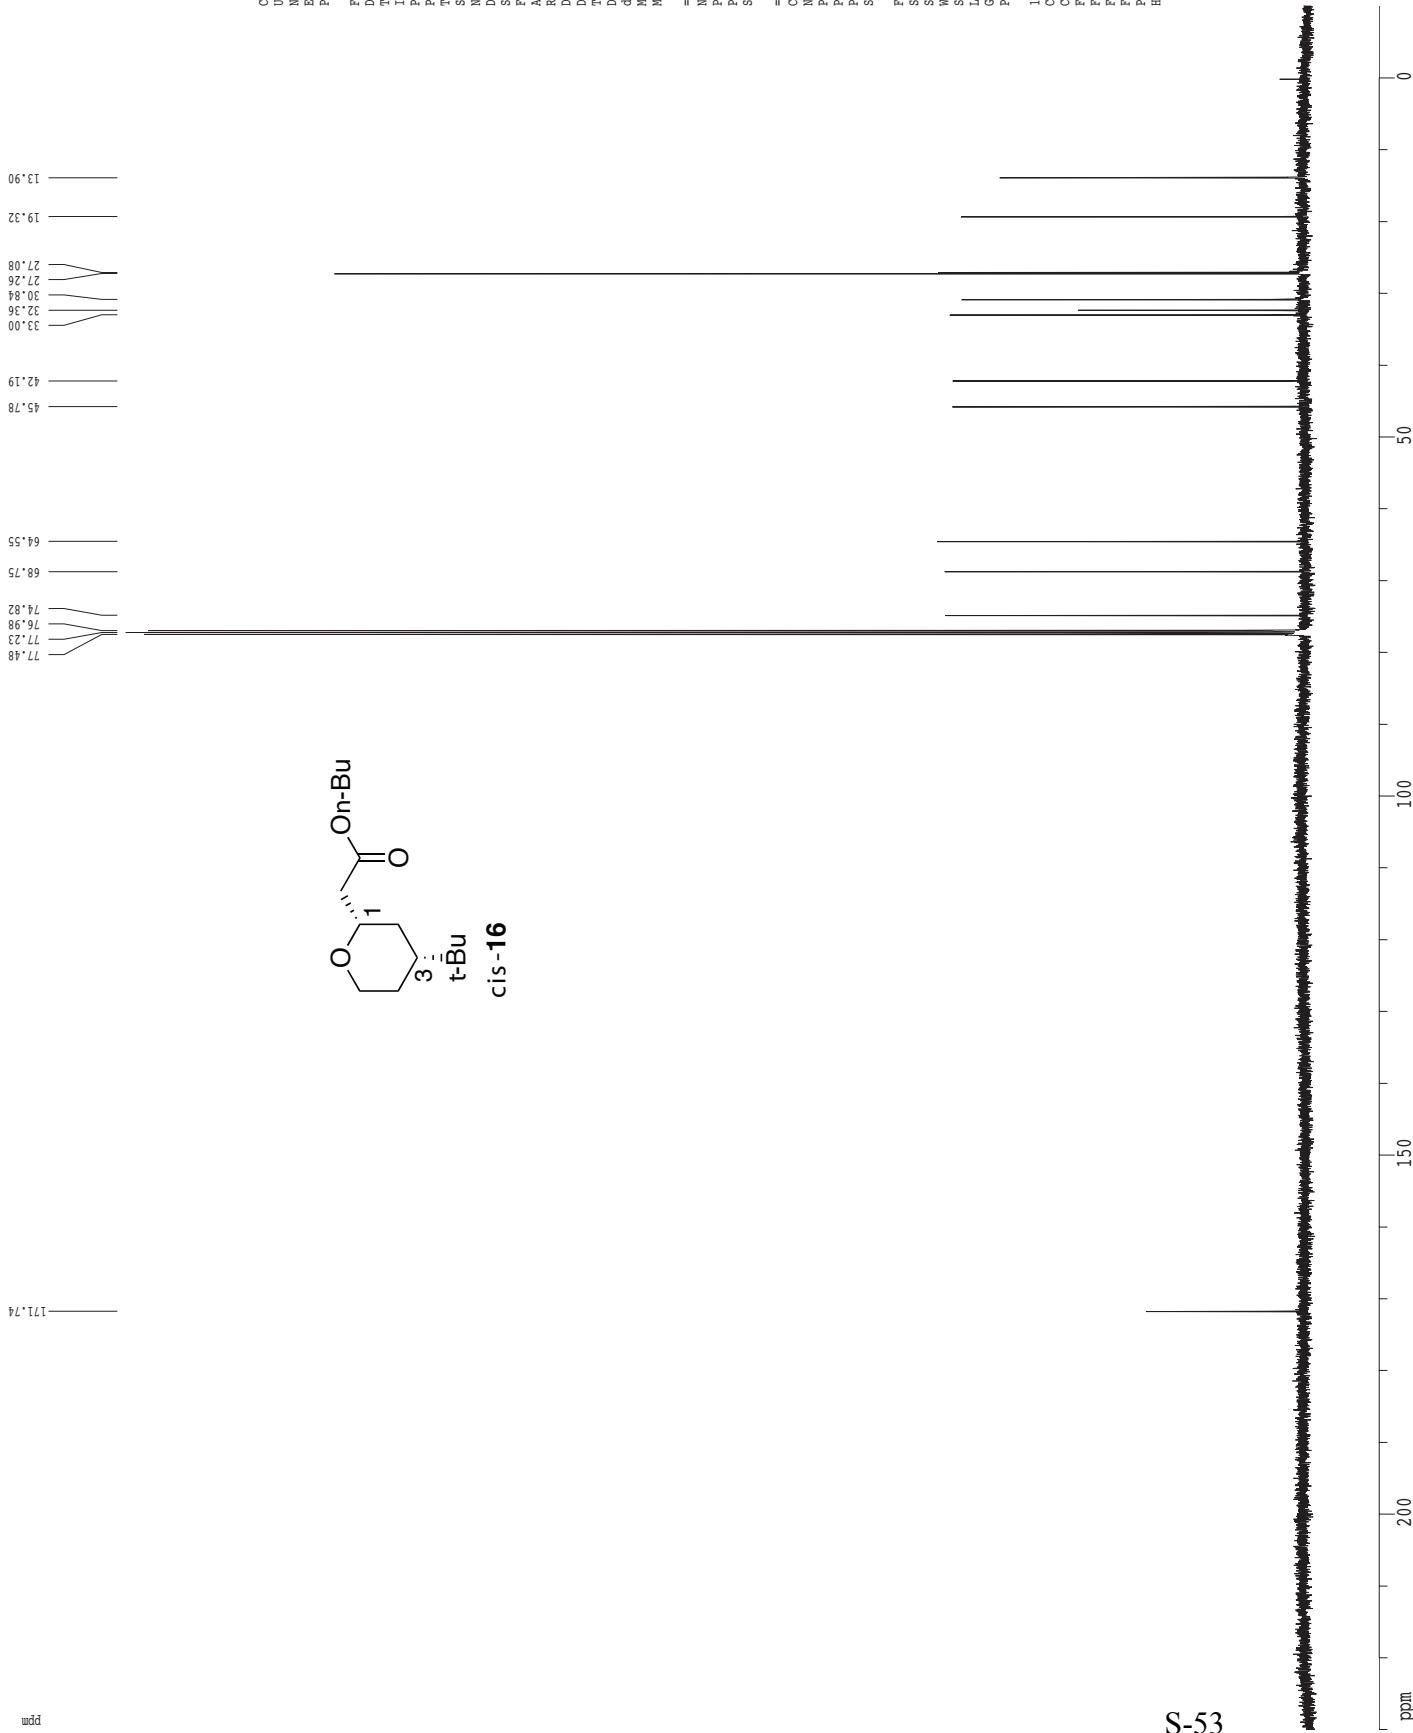

Current Data Parameters  
 USER walter  
 NAME WAS-III-166-26  
 EXPNO 1  
 PROCNO 1

F2 - Acquisition Parameters  
 Date\_ 20071002  
 Time 16.42  
 INSTRUM cryo500  
 PROBHD 5 mm CPTCI LH-  
 PULPROG zgpg30  
 TD 65536  
 SOLVENT CDCl3T  
 NS 77  
 DS 30303.00 Hz  
 SFO1 0.642388 Hz  
 AC 1.0814105 sec  
 RG 1.0004  
 DW 16.500 usec  
 DE 6.00 usec  
 TE 298.0 K  
 D1 0.25000000 sec  
 d11 0.03000000 sec  
 MCREST 0.00000000 sec  
 MONRK 0.01500000 sec

===== CHANNEL f1 =====  
 NUC1 13C  
 P1 15.00 usec  
 PL1 -1.00 dB  
 SFO1 125.7942348 MHz

===== CHANNEL f2 =====  
 CPMPC2 waltz16  
 NUC2 1H  
 PCPD2 100.00 usec  
 PL2 -1.60 dB  
 PL12 23.54 dB  
 SFO2 500.2225011 MHz

F2 - Processing parameters  
 SI 65536  
 SF 125.7803987 MHz  
 WDW EM  
 SSB 0  
 LB 1.00 Hz  
 GB 0  
 PC 2.00

LD NMR plot parameters  
 X 72.80 cm  
 Y 1.00 cm  
 Z 20.000 ppm  
 F1 28929.49 Hz  
 F2 -10.000 ppm  
 F2 -1257.80 Hz  
 PPMCM 10.52632 ppm/cm  
 HZCM 1324.00427 Hz/cm

```

=====
Injection Date   : 5/2/2008 3:46:51 PM      Seq. Line   :    7
Sample Name     : WAS-IV-37-23             Location    : Vial 20
Acq. Operator   : jelena                   Inj         :    1
                                           Inj Volume  : 1 µl
                                           Actual Inj Volume : 5 µl
Different Inj Volume from Sequence !
Acq. Method     : C:\HPCHEM\1\METHODS\WALTER.M
Last changed    : 11/12/2005 3:11:30 PM by Susan
Analysis Method : C:\HPCHEM\1\METHODS\SHUTDOWN.M
Last changed    : 6/10/2008 9:37:46 AM by jelena
                (modified after loading)
=====

```

**Table 1, Entry 1**

## Shutdown Method

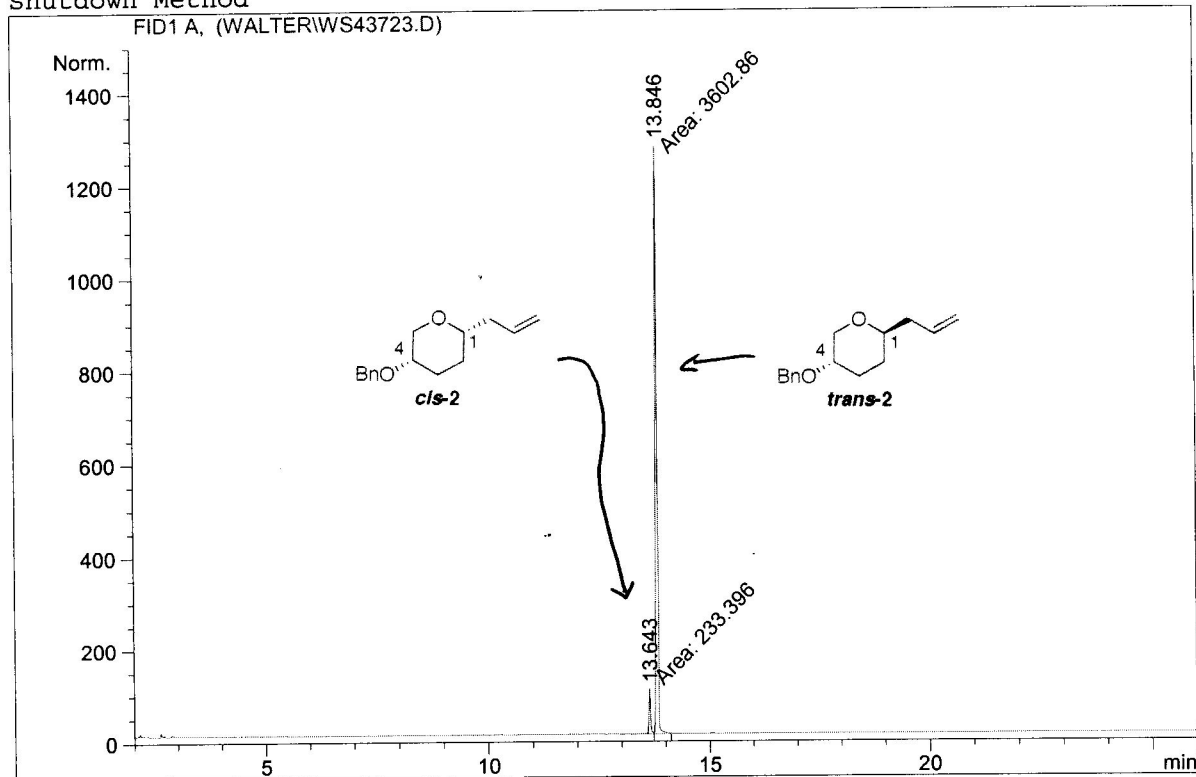

```

=====
Area Percent Report
=====

```

```

Sorted By       :      Signal
Multiplier      :      1.0000
Dilution        :      1.0000

```

Signal 1: FID1 A,

| Peak # | RetTime [min] | Type | Width [min] | Area [pA*s] | Height [pA] | Area %   |
|--------|---------------|------|-------------|-------------|-------------|----------|
| 1      | 13.643        | MM   | 0.0399      | 233.39619   | 97.60922    | 6.08395  |
| 2      | 13.846        | MM   | 0.0473      | 3602.86206  | 1270.33093  | 93.91605 |

```
Totals :                3836.25826 1367.94016
```

Results obtained with enhanced integrator!

```

=====
*** End of Report ***
=====

```

```

=====
Injection Date : 2/14/2008 7:31:59 PM      Seq. Line :    2
Sample Name    : WAS-IV-8-23                Location  : Vial 8
Acq. Operator  : jelena                      Inj       :    1
                                           Inj Volume: 1 µl
                                           Actual Inj Volume: 5 µl
Different Inj Volume from Sequence !
Acq. Method    : C:\HPCHEM\1\METHODS\WALTER.M
Last changed   : 11/12/2005 3:11:30 PM by Susan
Analysis Method : C:\HPCHEM\1\METHODS\SHUTDOWN.M
Last changed   : 6/10/2008 9:38:48 AM by jelena
                (modified after loading)
    
```

## Table 1, Entry 2

Shutdown Method

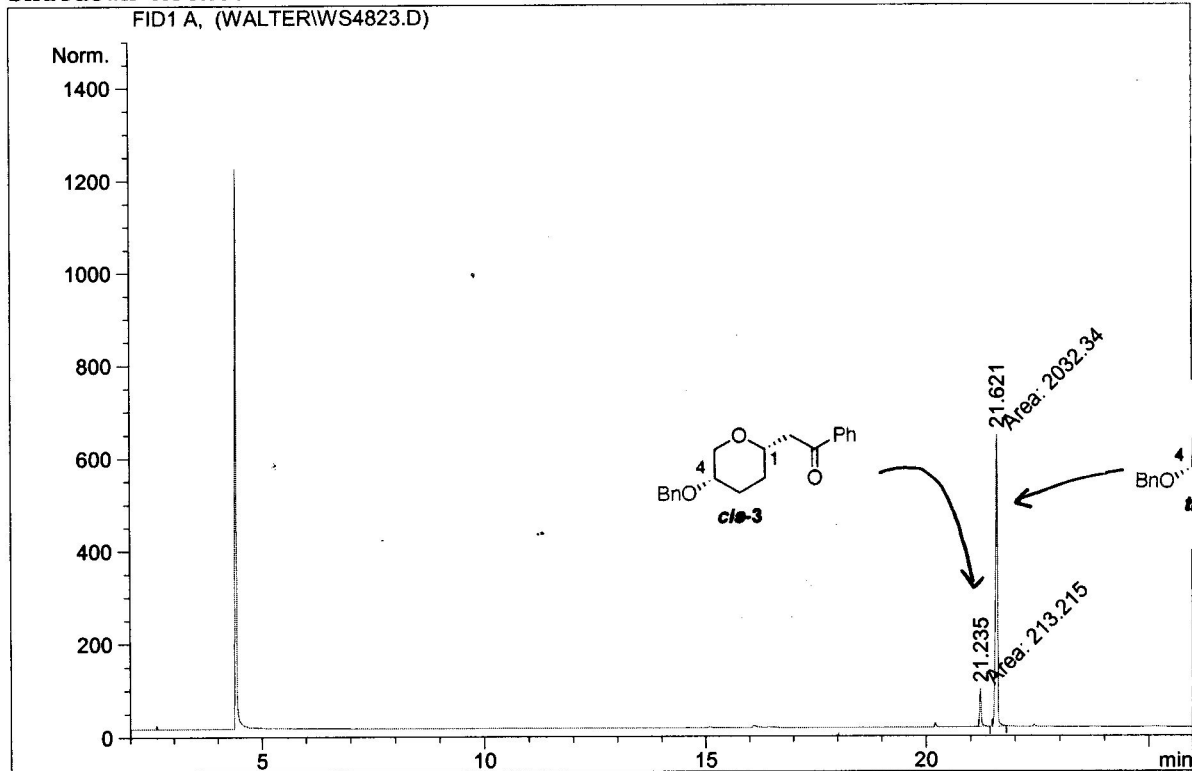

Area Percent Report

```

Sorted By      :      Signal
Multiplier    :      1.0000
Dilution      :      1.0000
    
```

Signal 1: FID1 A,

| Peak # | RetTime [min] | Type | Width [min] | Area [pA*s] | Height [pA] | Area %   |
|--------|---------------|------|-------------|-------------|-------------|----------|
| 1      | 21.235        | MM   | 0.0430      | 213.21509   | 82.68630    | 9.49497  |
| 2      | 21.621        | MM   | 0.0537      | 2032.34253  | 630.24927   | 90.50503 |

Totals : 2245.55762 712.93557

Results obtained with enhanced integrator!

\*\*\* End of Report \*\*\*

```

=====
Injection Date   : 9/11/2007 1:57:12 PM      Seq. Line   :    1
Sample Name     : WAS-III-154-25            Location    : Vial 4
Acq. Operator   : jelena                    Inj         :    1
                                           Inj Volume  : 1 µl
                                           Actual Inj Volume : 5 µl
Different Inj Volume from Sequence !
Acq. Method    : C:\HPCHEM\1\METHODS\WALTER.M
Last changed   : 11/12/2005 3:11:30 PM by Susan
Analysis Method : C:\HPCHEM\1\METHODS\SHUTDOWN.M
Last changed   : 6/10/2008 9:47:47 AM by jelena
                (modified after loading)
Shutdown Method

```

### Table 1, Entry 3

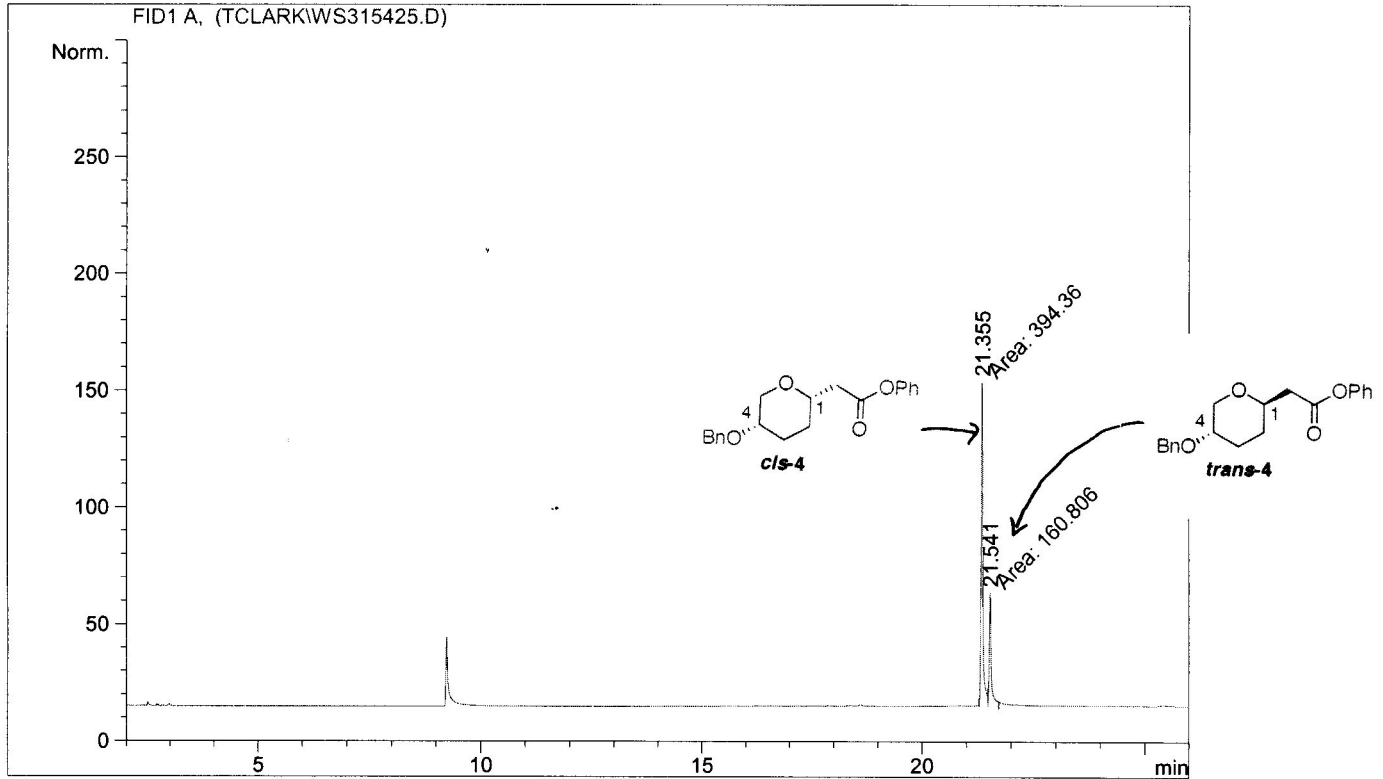

#### Area Percent Report

```

Sorted By      : Signal
Multiplier    : 1.0000
Dilution      : 1.0000

```

Signal 1: FID1 A,

| Peak # | RetTime [min] | Type | Width [min] | Area [pA*s] | Height [pA] | Area %   |
|--------|---------------|------|-------------|-------------|-------------|----------|
| 1      | 21.355        | MM   | 0.0474      | 394.36014   | 138.73720   | 71.03465 |
| 2      | 21.541        | MM   | 0.0551      | 160.80571   | 48.66586    | 28.96535 |

Totals : 555.16585 187.40305

Results obtained with enhanced integrator!

\*\*\* End of Report \*\*\*



```

=====
Injection Date   : 3/3/2008 9:09:07 PM      Seq. Line   :    2
Sample Name     : WAS-IV-18-24              Location    : Vial 2
Acq. Operator   : jelena                    Inj         :    1
                                           Inj Volume  : 1 µl
                                           Actual Inj Volume : 5 µl

Different Inj Volume from Sequence !

Acq. Method     : C:\HPCHEM\1\METHODS\WALTER.M
Last changed    : 11/12/2005 3:11:30 PM by Susan
Analysis Method : C:\HPCHEM\1\METHODS\OFF.M
Last changed    : 3/4/2008 9:18:21 AM by jelena
                 (modified after loading)
    
```

### Table 1, Entry 4

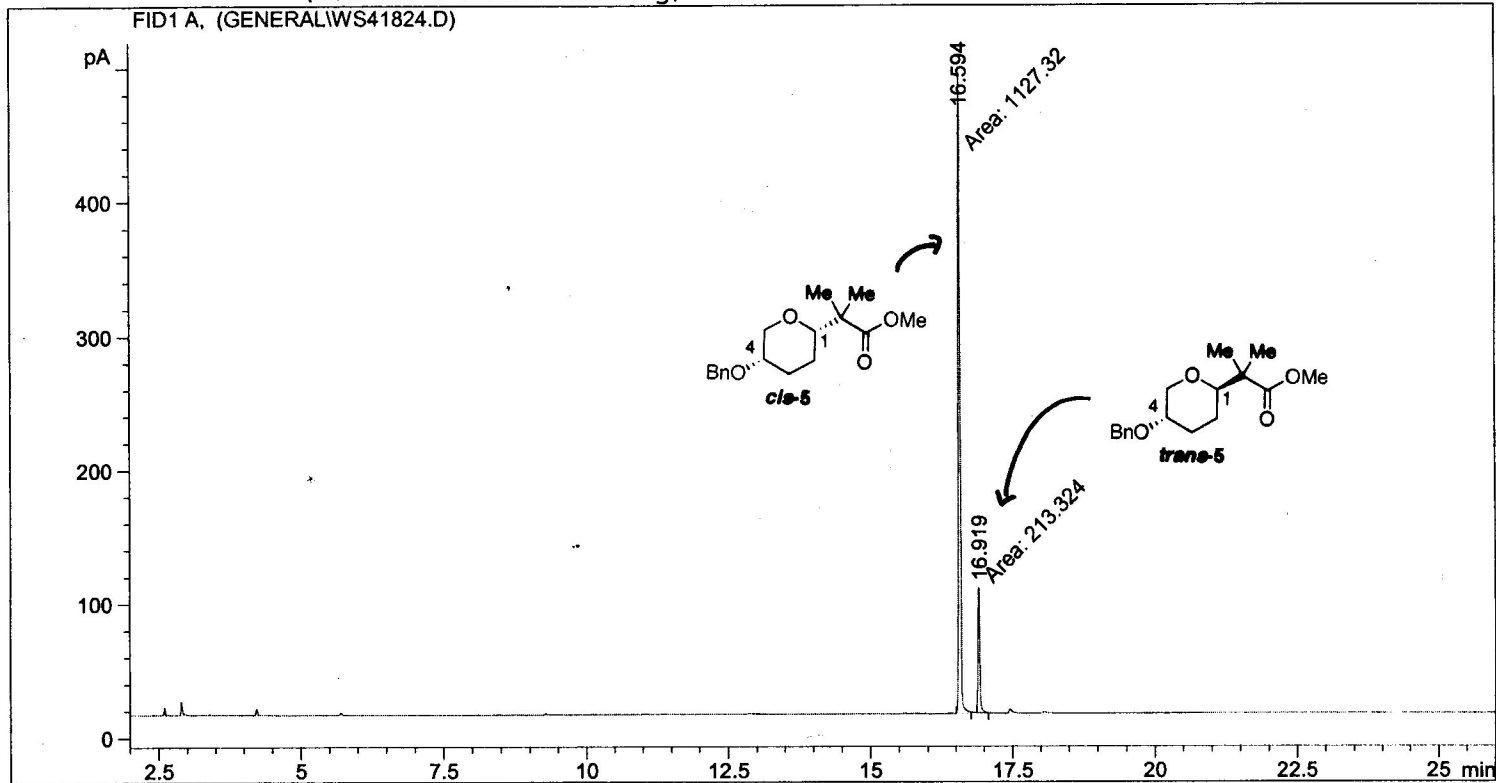

#### Area Percent Report

```

Sorted By      : Signal
Multiplier     : 1.0000
Dilution       : 1.0000
    
```

Signal 1: FID1 A,

| Peak # | RetTime [min] | Type | Width [min] | Area [pA*s] | Height [pA] | Area %   |
|--------|---------------|------|-------------|-------------|-------------|----------|
| 1      | 16.594        | MM   | 0.0392      | 1127.31763  | 478.89899   | 84.08791 |
| 2      | 16.919        | MM   | 0.0377      | 213.32408   | 94.20467    | 15.91209 |

Totals : 1340.64171 573.10366

Results obtained with enhanced integrator!

\*\*\* End of Report \*\*\*

```

=====
Injection Date   : 7/19/2007 3:19:51 PM      Seq. Line   :    3
Sample Name     : WAS-III-132-23            Location    : Vial 17
Acq. Operator   : jelena                    Inj         :    1
                                           Inj Volume  : 1 µl
                                           Actual Inj Volume : 5 µl
Different Inj Volume from Sequence !
Acq. Method     : C:\HPCHEM\1\METHODS\WALTER.M
Last changed    : 11/12/2005 3:11:30 PM by Susan
Analysis Method : C:\HPCHEM\1\METHODS\SHUTDOWN.M
Last changed    : 6/10/2008 9:41:43 AM by jelena
                 (modified after loading)
=====

```

# Table 1, Entry 5

### Shutdown Method

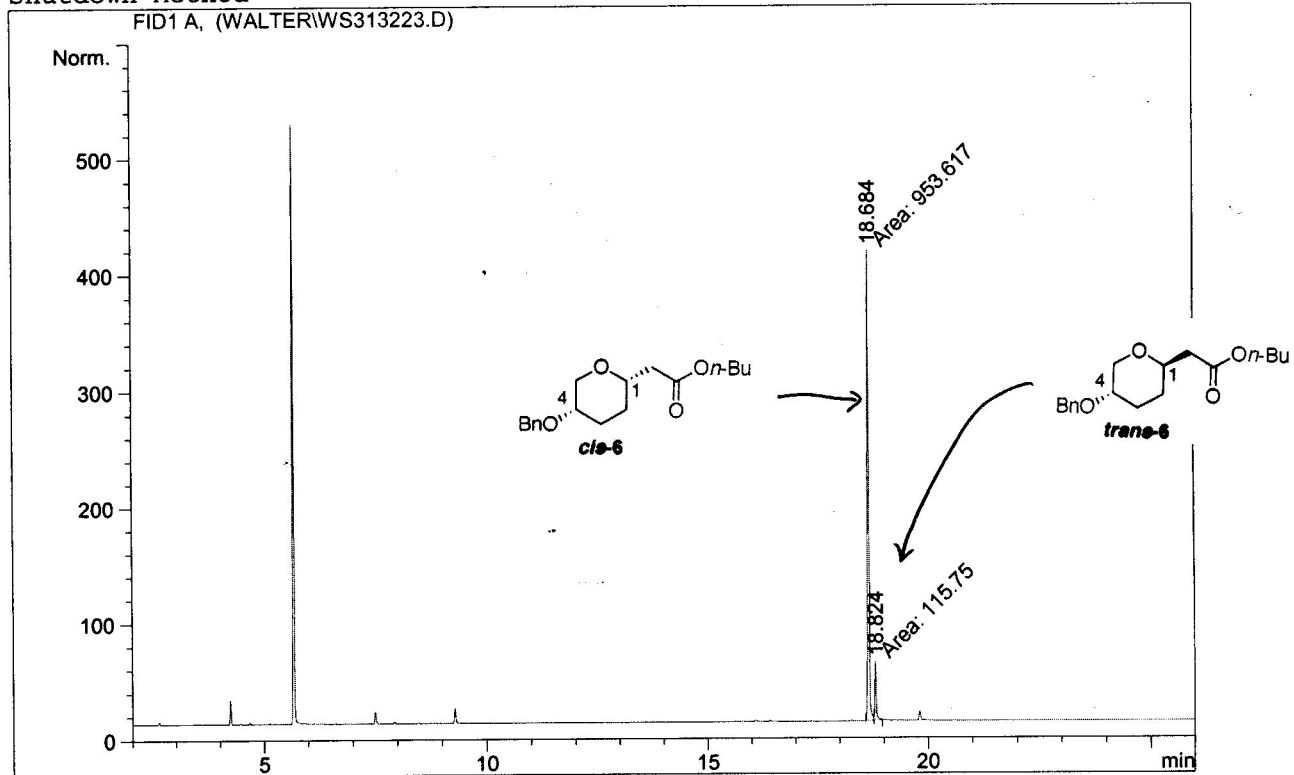

### Area Percent Report

```

=====
Sorted By      :      Signal
Multiplier     :      1.0000
Dilution      :      1.0000
=====

```

Signal 1: FID1 A,

| Peak # | RetTime [min] | Type | Width [min] | Area [pA*s] | Height [pA] | Area %   |
|--------|---------------|------|-------------|-------------|-------------|----------|
| 1      | 18.684        | MM   | 0.0393      | 953.61658   | 404.30756   | 89.17585 |
| 2      | 18.824        | MM   | 0.0384      | 115.74980   | 50.21415    | 10.82415 |

Totals : 1069.36638 454.52170

Results obtained with enhanced integrator!

\*\*\* End of Report \*\*\*

```

=====
Injection Date   : 2/21/2008 10:22:15 PM      Seq. Line   :    1
Sample Name     : WAS-IV-12-22                Location    : Vial 5
Acq. Operator  : jelena                       Inj         :    1
                                           Inj Volume  : 1 µl
                                           Actual Inj Volume : 5 µl

Different Inj Volume from Sequence !
Acq. Method    : C:\HPCHEM\1\METHODS\WALTER.M
Last changed   : 11/12/2005 3:11:30 PM by Susan
Analysis Method : C:\HPCHEM\1\METHODS\SHUTDOWN.M
Last changed   : 6/10/2008 9:29:12 AM by jelena
                (modified after loading)
  
```

**Table 2, Entry 1**

## Shutdown Method

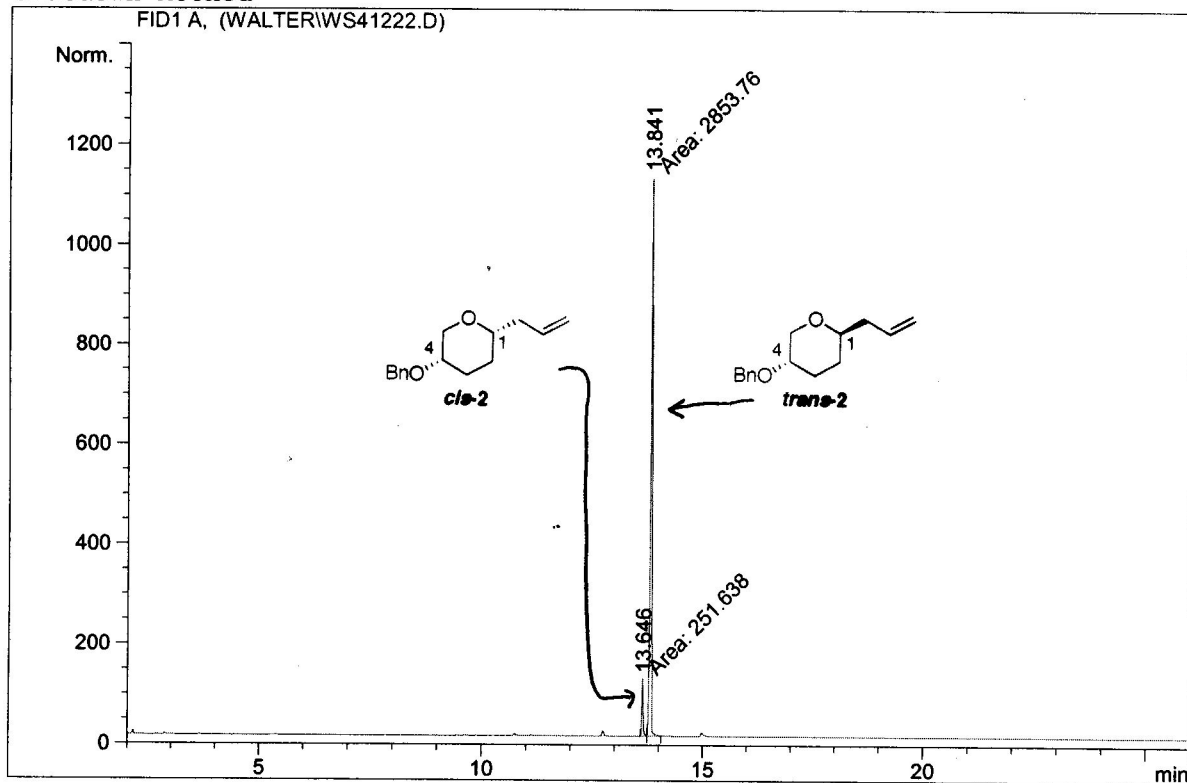

```

=====
Area Percent Report
=====
  
```

```

Sorted By      :      Signal
Multiplier     :      1.0000
Dilution       :      1.0000
  
```

Signal 1: FID1 A,

| Peak # | RetTime [min] | Type | Width [min] | Area [pA*s] | Height [pA] | Area %   |
|--------|---------------|------|-------------|-------------|-------------|----------|
| 1      | 13.646        | MM   | 0.0365      | 251.63829   | 114.98837   | 8.10325  |
| 2      | 13.841        | MM   | 0.0425      | 2853.76147  | 1119.56714  | 91.89675 |

```
Totals :                3105.39977 1234.55551
```

Results obtained with enhanced integrator!

```

=====
*** End of Report ***
  
```

Injection Date : 6/22/2007 3:07:27 PM      Seq. Line : 3  
 Sample Name : WAS-III-121      Location : Vial 1  
 Acq. Operator : jelena      Inj : 1  
                                          Inj Volume : 1 µl  
 Different Inj Volume from Sequence !      Actual Inj Volume : 5 µl  
 Acq. Method : C:\HPCHEM\1\METHODS\WALTER.M  
 Last changed : 11/12/2005 3:11:30 PM by Susan  
 Analysis Method : C:\HPCHEM\1\METHODS\SHUTDOWN.M  
 Last changed : 6/10/2008 9:31:32 AM by jelena  
                                          (modified after loading)

**Table 2, Entry 2**

## Shutdown Method

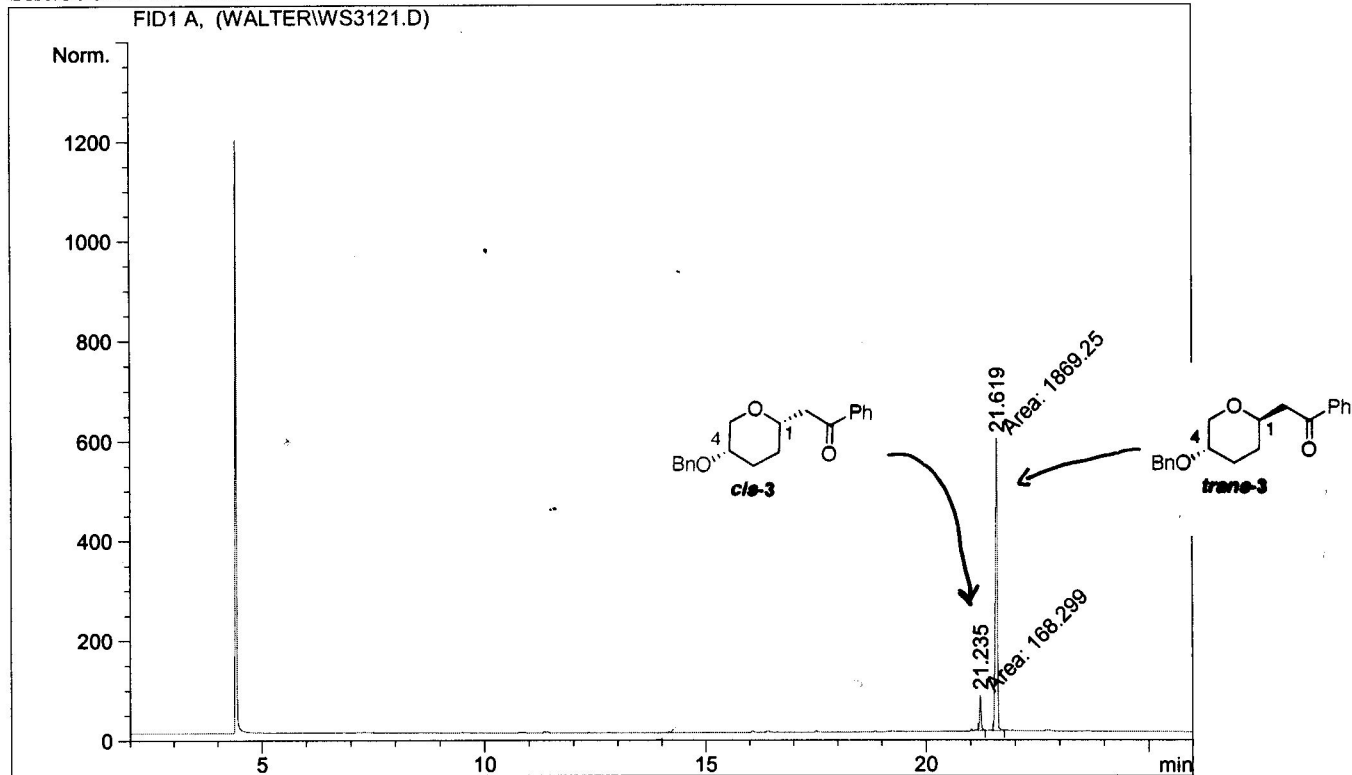
 =====  
 Area Percent Report  
 =====

Sorted By : Signal  
 Multiplier : 1.0000  
 Dilution : 1.0000

Signal 1: FID1 A,

| Peak # | RetTime [min] | Type | Width [min] | Area [pA*s] | Height [pA] | Area %   |
|--------|---------------|------|-------------|-------------|-------------|----------|
| 1      | 21.235        | MM   | 0.0401      | 168.29939   | 70.01180    | 8.25990  |
| 2      | 21.619        | MM   | 0.0533      | 1869.24854  | 584.89423   | 91.74010 |

Totals :                              2037.54793      654.90602

Results obtained with enhanced integrator!

 =====  
 \*\*\* End of Report \*\*\*

```

=====
Injection Date   : 11/4/2005 3:55:37 PM          Seq. Line   :    5
Sample Name     : WAS-II-92-26                  Location    : Vial 2
Acq. Operator   : jelena                        Inj         :    1
                                                    Inj Volume  : 1 µl
                                                    Actual Inj Volume : 5 µl
Different Inj Volume from Sequence !
Acq. Method     : C:\HPCHEM\1\METHODS\WALTER.M
Last changed    : 7/28/2005 3:54:19 PM by jelena
Analysis Method : C:\HPCHEM\1\METHODS\SHUTDOWN.M
Last changed    : 6/10/2008 9:33:41 AM by jelena
                (modified after loading)
  
```

**Table 2, Entry 3**

## Shutdown Method

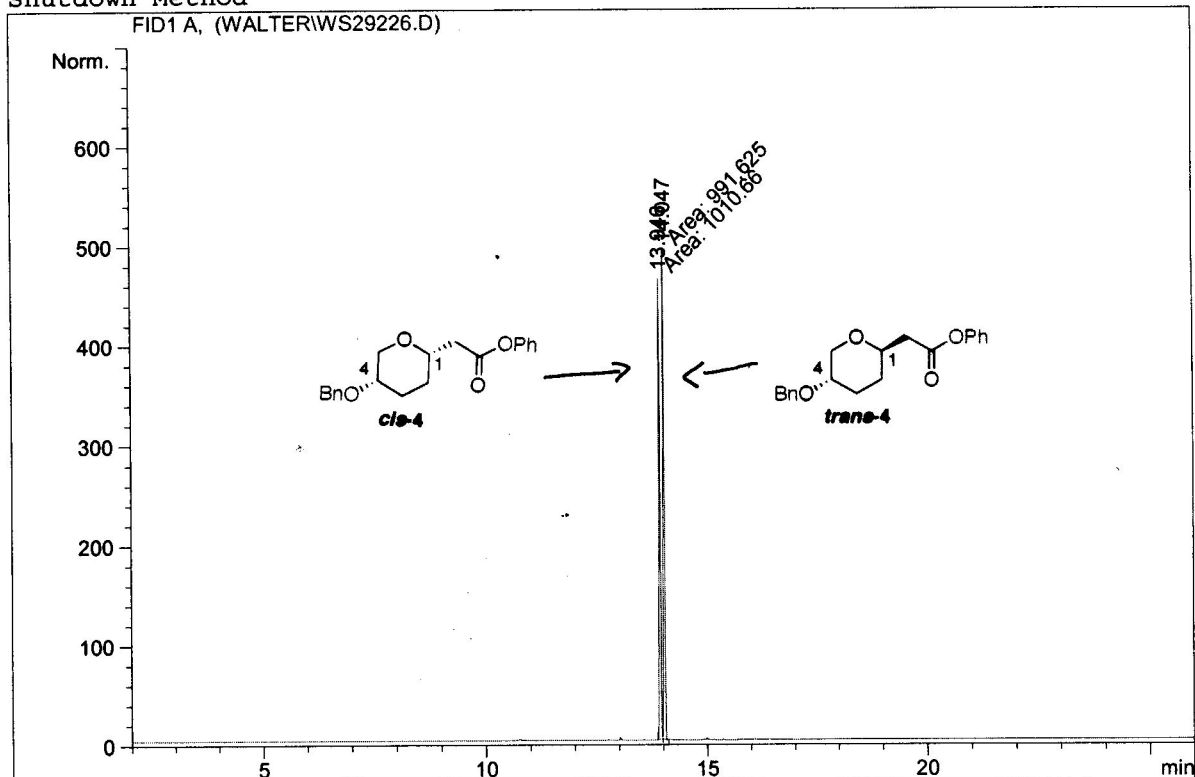

```

=====
                          Area Percent Report
=====
  
```

```

Sorted By           :      Signal
Multiplier          :      1.0000
Dilution            :      1.0000
  
```

Signal 1: FID1 A,

| Peak # | RetTime [min] | Type | Width [min] | Area [pA*s] | Height [pA] | Area %   |
|--------|---------------|------|-------------|-------------|-------------|----------|
| 1      | 13.946        | MM   | 0.0364      | 1010.65692  | 462.99808   | 50.47527 |
| 2      | 14.047        | MM   | 0.0337      | 991.62451   | 490.82718   | 49.52473 |

```
Totals :                      2002.28143  953.82526
```

Results obtained with enhanced integrator!

```

=====
*** End of Report ***
  
```

```

=====
Injection Date   : 3/3/2008 8:33:30 PM      Seq. Line   :    1
Sample Name     : WAS-IV-17-24             Location    : Vial 1
Acq. Operator  : jelena                    Inj         :    1
                                                Inj Volume  : 1 µl
                                                Actual Inj Volume : 5 µl
Different Inj Volume from Sequence !
Acq. Method    : C:\HPCHEM\1\METHODS\WALTER.M
Last changed   : 11/12/2005 3:11:30 PM by Susan
Analysis Method : C:\HPCHEM\1\METHODS\OFF.M
Last changed   : 3/4/2008 9:19:13 AM by jelena
                (modified after loading)
    
```

### Table 2, Entry 4

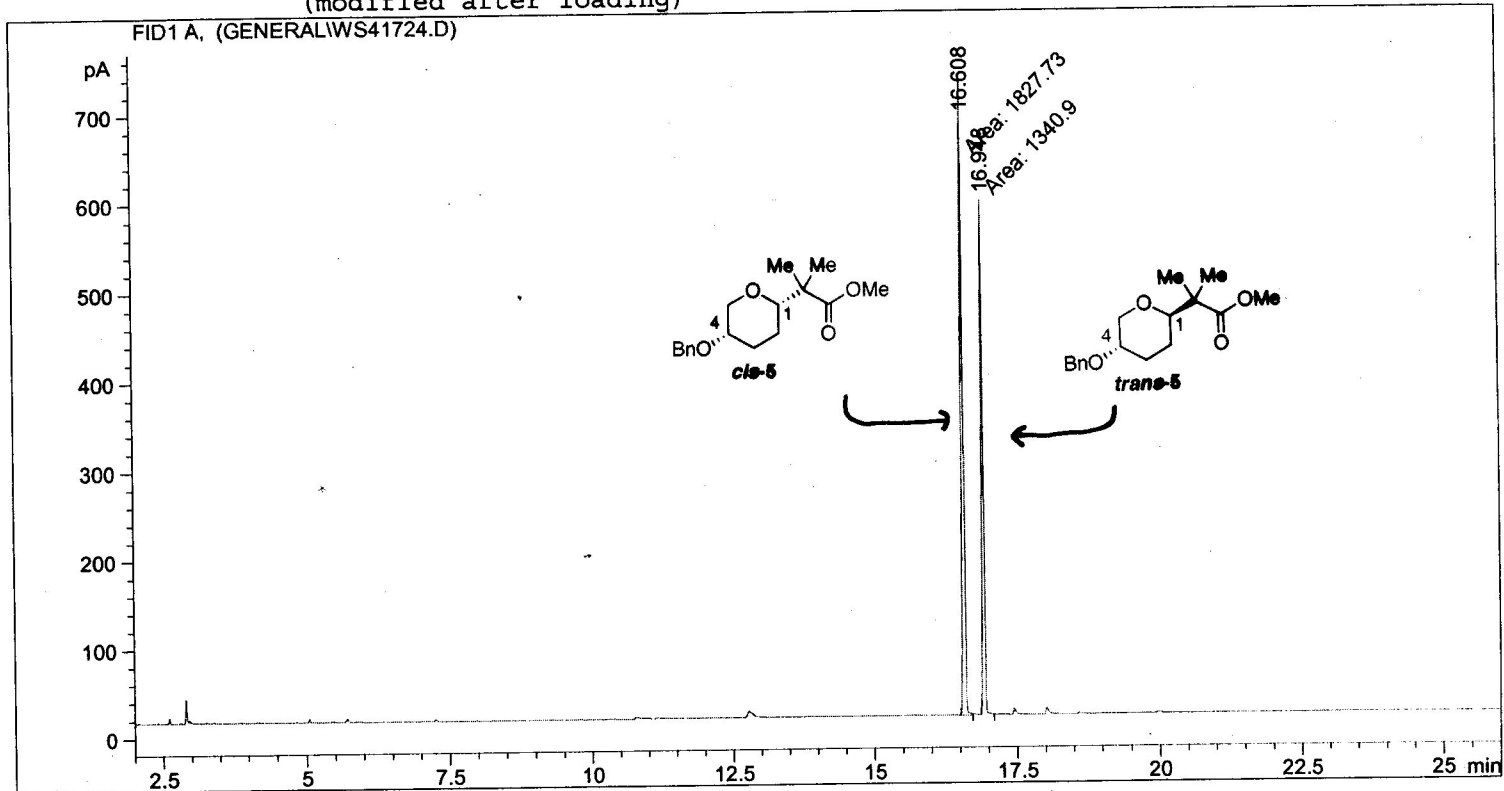

#### Area Percent Report

```

Sorted By      : Signal
Multiplier     : 1.0000
Dilution       : 1.0000
    
```

Signal 1: FID1 A,

| Peak # | RetTime [min] | Type | Width [min] | Area [pA*s] | Height [pA] | Area %   |
|--------|---------------|------|-------------|-------------|-------------|----------|
| 1      | 16.608        | MM   | 0.0424      | 1827.72974  | 719.08203   | 57.68210 |
| 2      | 16.948        | MM   | 0.0385      | 1340.89600  | 580.03223   | 42.31790 |

Totals : 3168.62573 1299.11426

Results obtained with enhanced integrator!

\*\*\* End of Report \*\*\*

```

=====
Injection Date : 4/12/2006 1:30:20 PM      Seq. Line : 2
Sample Name    : WAS-II-147-21             Location  : Vial 13
Acq. Operator  : Jelena                     Inj      : 1
                                                Inj Volume: 1 µl
                                                Actual Inj Volume: 3 µl
Different Inj Volume from Sequence !
Acq. Method    : C:\HPCHEM\1\METHODS\WALTER.M
Last changed   : 11/12/2005 3:11:30 PM by Susan
Analysis Method : C:\HPCHEM\1\METHODS\SHUTDOWN.M
Last changed   : 6/10/2008 9:36:06 AM by jelena
                (modified after loading)
    
```

**Table 2, Entry 5**

Shutdown Method

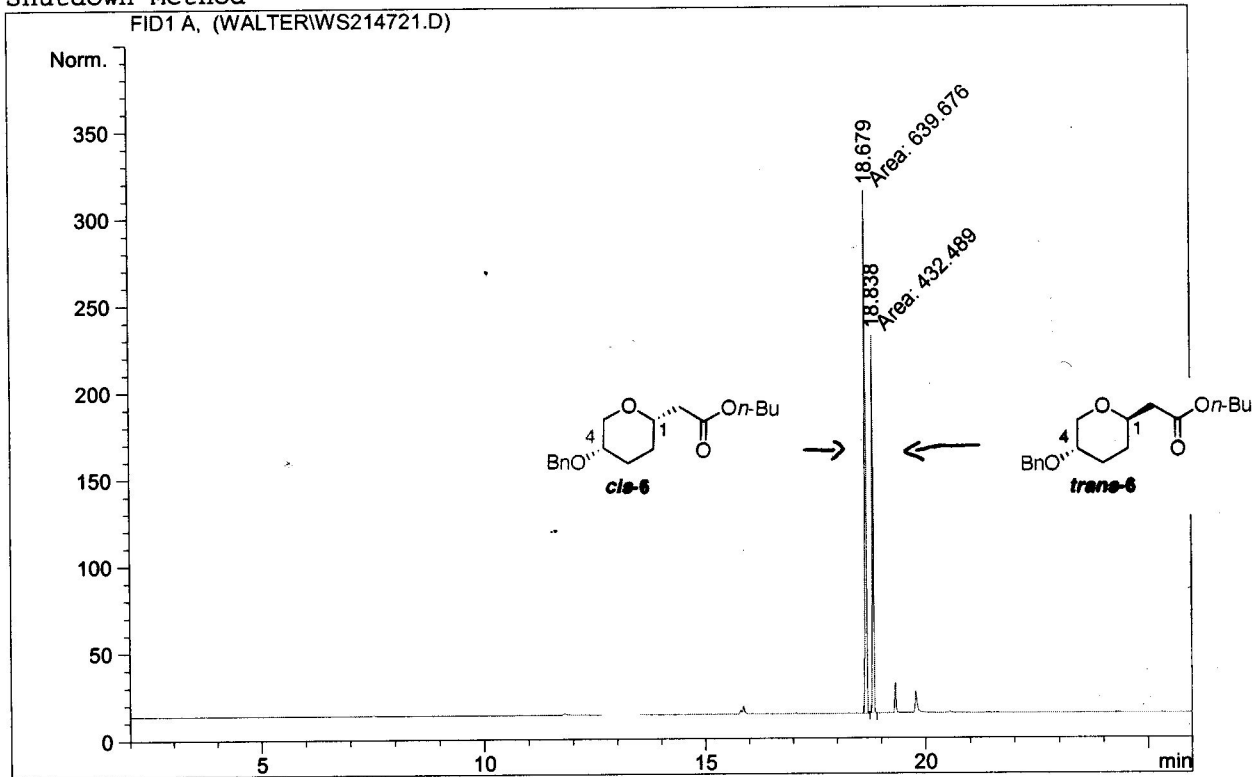

Area Percent Report

```

Sorted By      : Signal
Multiplier     : 1.0000
Dilution       : 1.0000
    
```

Signal 1: FID1 A,

| Peak # | RetTime [min] | Type | Width [min] | Area [pA*s] | Height [pA] | Area %   |
|--------|---------------|------|-------------|-------------|-------------|----------|
| 1      | 18.679        | MM   | 0.0355      | 639.67639   | 300.33771   | 59.66213 |
| 2      | 18.838        | MM   | 0.0332      | 432.48853   | 217.42862   | 40.33787 |

Totals : 1072.16492 517.76633

Results obtained with enhanced integrator!

\*\*\* End of Report \*\*\*

```

=====
Injection Date   : 2/5/2007 11:13:31 AM      Seq. Line   :    1
Sample Name     : WAS-III-58-c              Location    : Vial 1
Acq. Operator  : jennifer                   Inj         :    1
                                           Inj Volume  : 1 µl
                                           Actual Inj Volume : 5 µl
Different Inj Volume from Sequence !
Sequence File   : C:\HPCHEM\1\SEQUENCE\KRUMPER.S
Method          : C:\HPCHEM\1\METHODS\WALTER.M
Last changed    : 11/12/2005 3:11:30 PM by Susan
=====

```

**Table 3, Entry 1**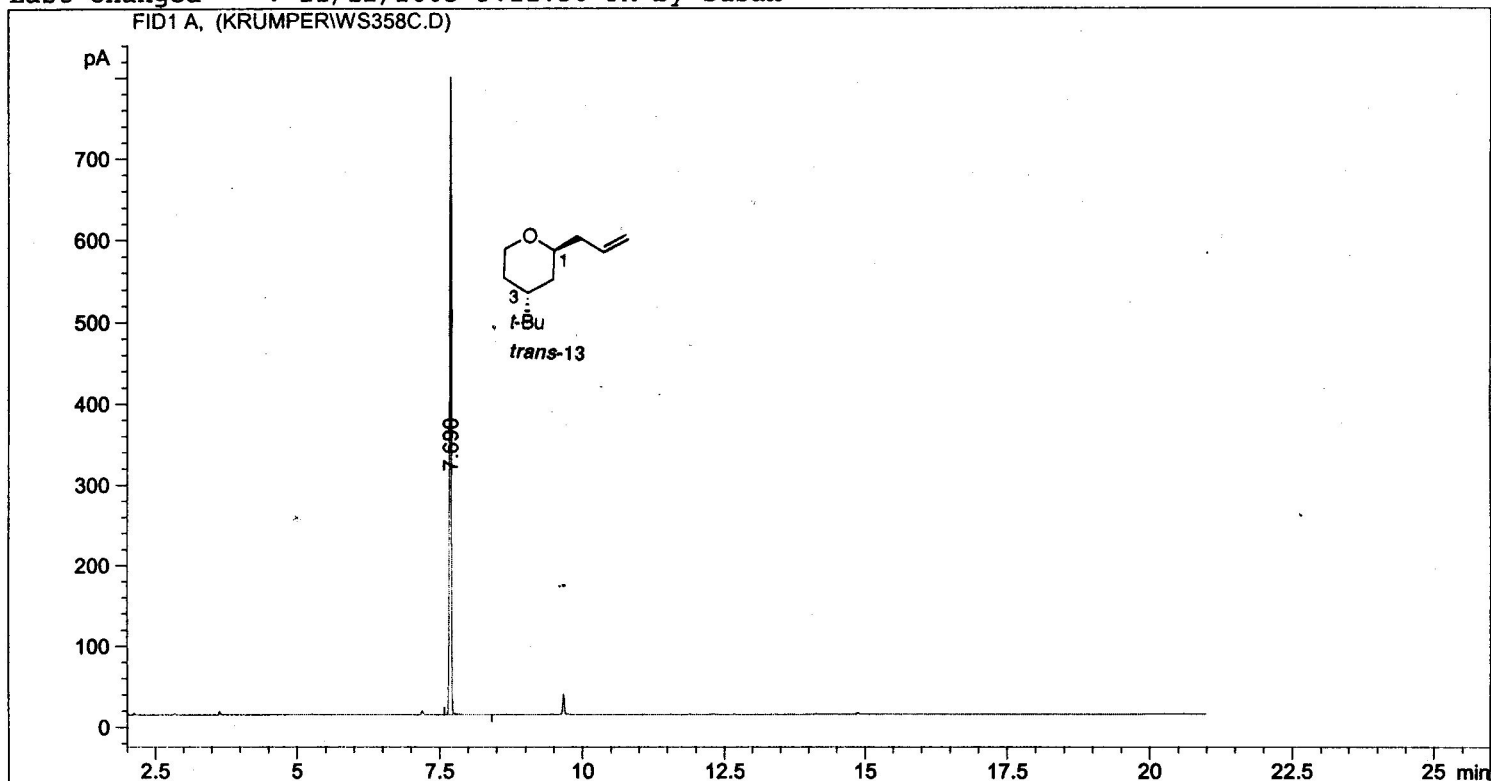

```

=====
                          Area Percent Report
=====

```

```

Sorted By           :      Signal
Multiplier          :      1.0000
Dilution            :      1.0000

```

Signal 1: FID1 A,

| Peak # | RetTime [min] | Type | Width [min] | Area [pA*s] | Height [pA] | Area %  |
|--------|---------------|------|-------------|-------------|-------------|---------|
| 1      | 7.690         | BP   | 0.0875      | 1543.63904  | 294.10623   | 1.000e2 |

```
Totals :                1543.63904  294.10623
```

Results obtained with enhanced integrator!

```

=====
*** End of Report ***
=====

```



```

=====
Injection Date : 2/8/2007 5:43:13 PM      Seq. Line : 5
Sample Name    : WAS-III-62-22            Location  : Vial 11
Acq. Operator  : jennifer                  Inj      : 1
                                           Inj Volume : 1 µl
                                           Actual Inj Volume : 5 µl
Different Inj Volume from Sequence !
Acq. Method    : C:\HPCHEM\1\METHODS\WALTER.M
Last changed   : 11/12/2005 3:11:30 PM by Susan
Analysis Method : C:\HPCHEM\1\METHODS\KRUMPER.M
Last changed   : 1/30/2007 2:38:20 PM by jelena
    
```

**Table 3, Entry 2**

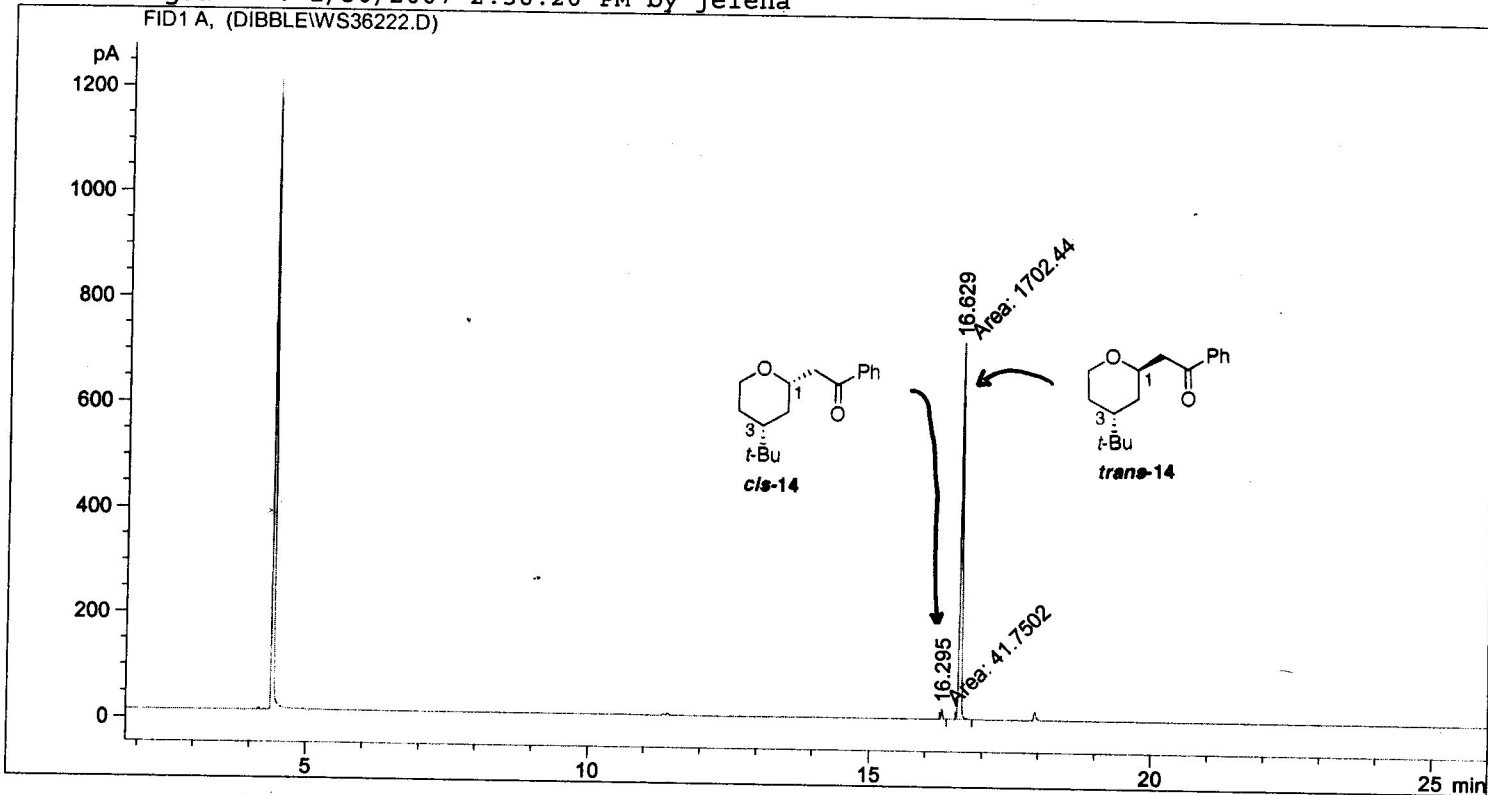

=====  
**Area Percent Report**  
 =====

```

Sorted By      : Signal
Multiplier     : 1.0000
Dilution       : 1.0000
    
```

Signal 1: FID1 A,

| Peak # | RetTime [min] | Type | Width [min] | Area [pA*s] | Height [pA] | Area %   |
|--------|---------------|------|-------------|-------------|-------------|----------|
| 1      | 16.295        | MM   | 0.0352      | 41.75023    | 19.78161    | 2.39368  |
| 2      | 16.629        | MM   | 0.0397      | 1702.43750  | 715.33228   | 97.60632 |

Totals : 1744.18773 735.11388

Results obtained with enhanced integrator!

=====  
 \*\*\* End of Report \*\*\*

```

=====
Injection Date   : 2/5/2007 11:49:07 AM      Seq. Line   :    2
Sample Name     : WAS-III-59-c              Location    : Vial 2
Acq. Operator   : jennifer                  Inj         :    1
                                           Inj Volume  : 1 µl
Different Inj Volume from Sequence !      Actual Inj Volume : 5 µl
Acq. Method     : C:\HPCHEM\1\METHODS\WALTER.M
Last changed    : 11/12/2005 3:11:30 PM by Susan
Analysis Method : C:\HPCHEM\1\METHODS\KRUMPER.M
Last changed    : 1/30/2007 2:38:20 PM by jelena
    
```

### Table 3, Entry 3

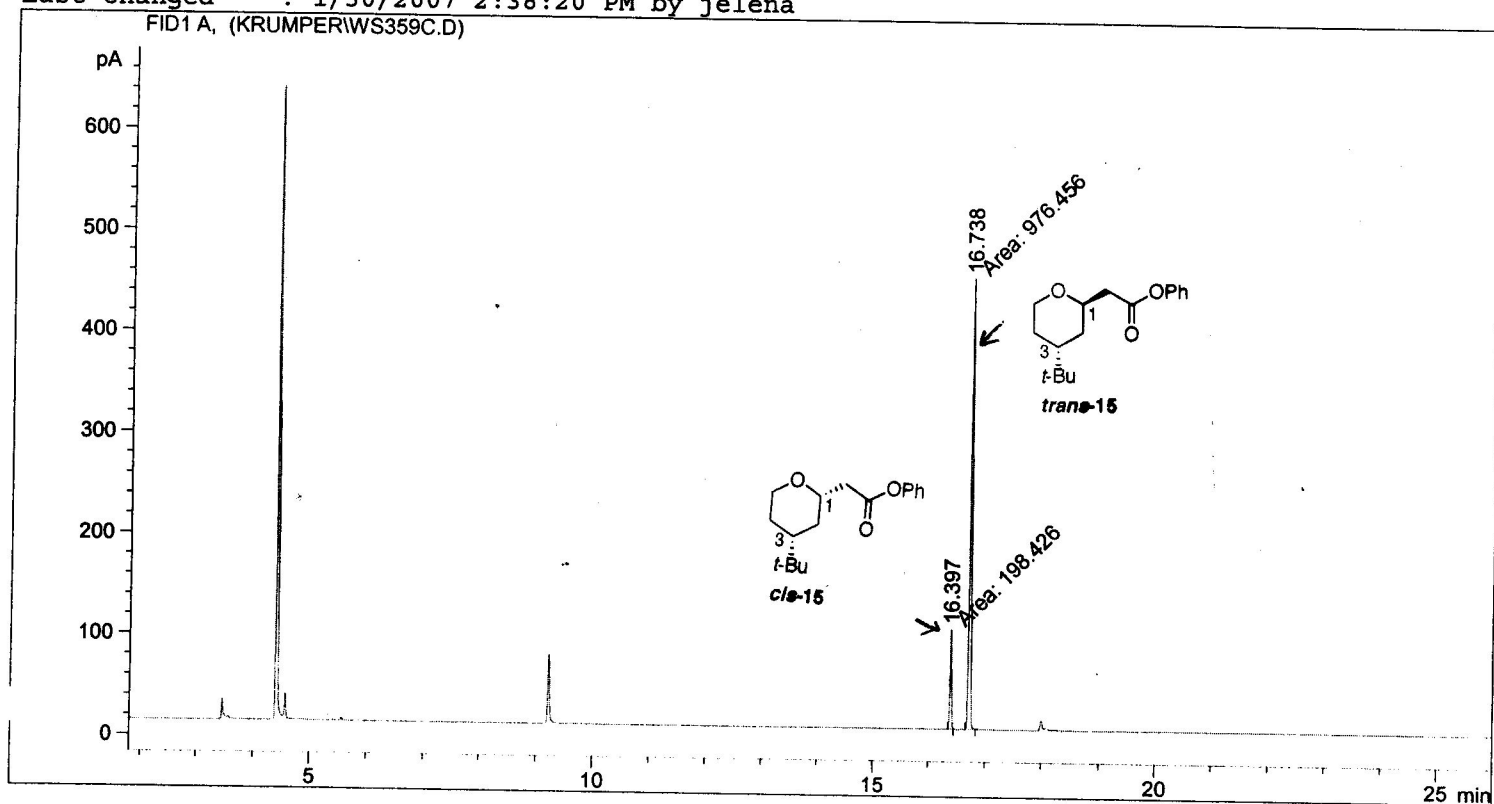

#### Area Percent Report

```

Sorted By      : Signal
Multiplier    : 1.0000
Dilution      : 1.0000
    
```

Signal 1: FID1 A,

| Peak # | RetTime [min] | Type | Width [min] | Area [pA*s] | Height [pA] | Area %   |
|--------|---------------|------|-------------|-------------|-------------|----------|
| 1      | 16.397        | MM   | 0.0338      | 198.42632   | 97.87888    | 16.88904 |
| 2      | 16.738        | MM   | 0.0366      | 976.45593   | 444.12595   | 83.11096 |

Totals : 1174.88225 542.00483

Results obtained with enhanced integrator!

\*\*\* End of Report \*\*\*

```

=====
Injection Date   : 2/6/2007 5:33:45 PM           Seq. Line   :    2
Sample Name     : WAS-III-61-22                 Location    : Vial 8
Acq. Operator   : jennifer                       Inj         :    1
                                                    Inj Volume  : 1 µl
                                                    Actual Inj Volume : 5 µl
Different Inj Volume from Sequence !
Acq. Method     : C:\HPCHEM\1\METHODS\WALTER.M
Last changed    : 11/12/2005 3:11:30 PM by Susan
Analysis Method : C:\HPCHEM\1\METHODS\KRUMPER.M
Last changed    : 1/30/2007 2:38:20 PM by jelena
=====

```

**Table 3, Entry 4**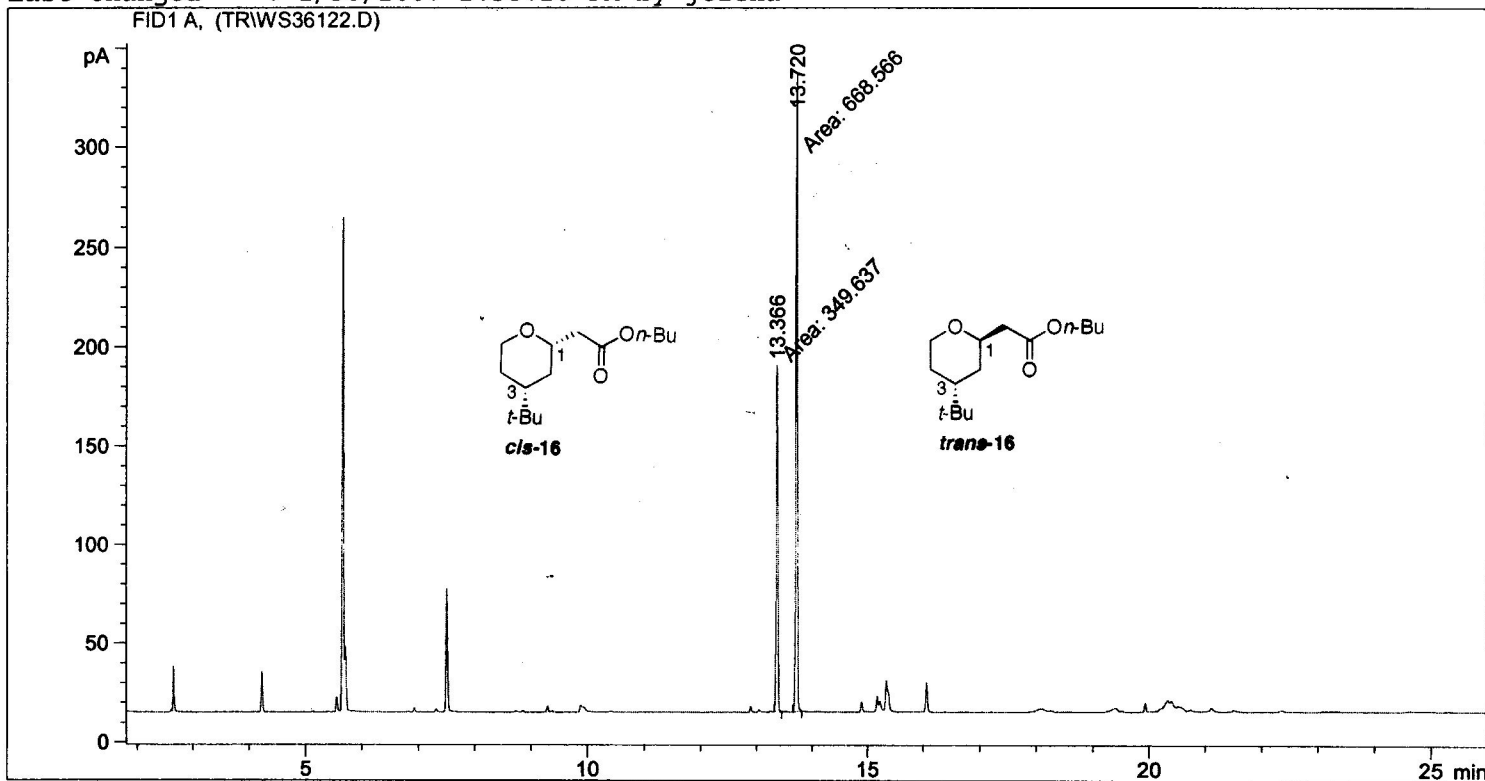

```

=====
Area Percent Report
=====

```

```

Sorted By       :      Signal
Multiplier      :      1.0000
Dilution        :      1.0000

```

Signal 1: FID1 A,

| Peak # | RetTime [min] | Type | Width [min] | Area [pA*s] | Height [pA] | Area %   |
|--------|---------------|------|-------------|-------------|-------------|----------|
| 1      | 13.366        | MM   | 0.0333      | 349.63651   | 174.95299   | 34.33861 |
| 2      | 13.720        | MM   | 0.0348      | 668.56580   | 319.88483   | 65.66139 |

```
Totals :                1018.20230  494.83781
```

Results obtained with enhanced integrator!

```

=====
*** End of Report ***
=====

```

```

=====
Injection Date : 5/20/2008 10:44:47 AM      Seq. Line : 1
Sample Name    : WAS-IV-38                  Location  : Vial 2
Acq. Operator  : jelena                     Inj      : 1
                                                Inj Volume: 1 µl
                                                Actual Inj Volume: 5 µl
Different Inj Volume from Sequence !
Acq. Method    : C:\HPCHEM\1\METHODS\WALTER.M
Last changed   : 11/12/2005 3:11:30 PM by Susan
Analysis Method : C:\HPCHEM\1\METHODS\SHUTDOWN.M
Last changed   : 5/20/2008 11:49:48 AM by jelena
                (modified after loading)
    
```

# Table 4, Entry 1

Shutdown Method

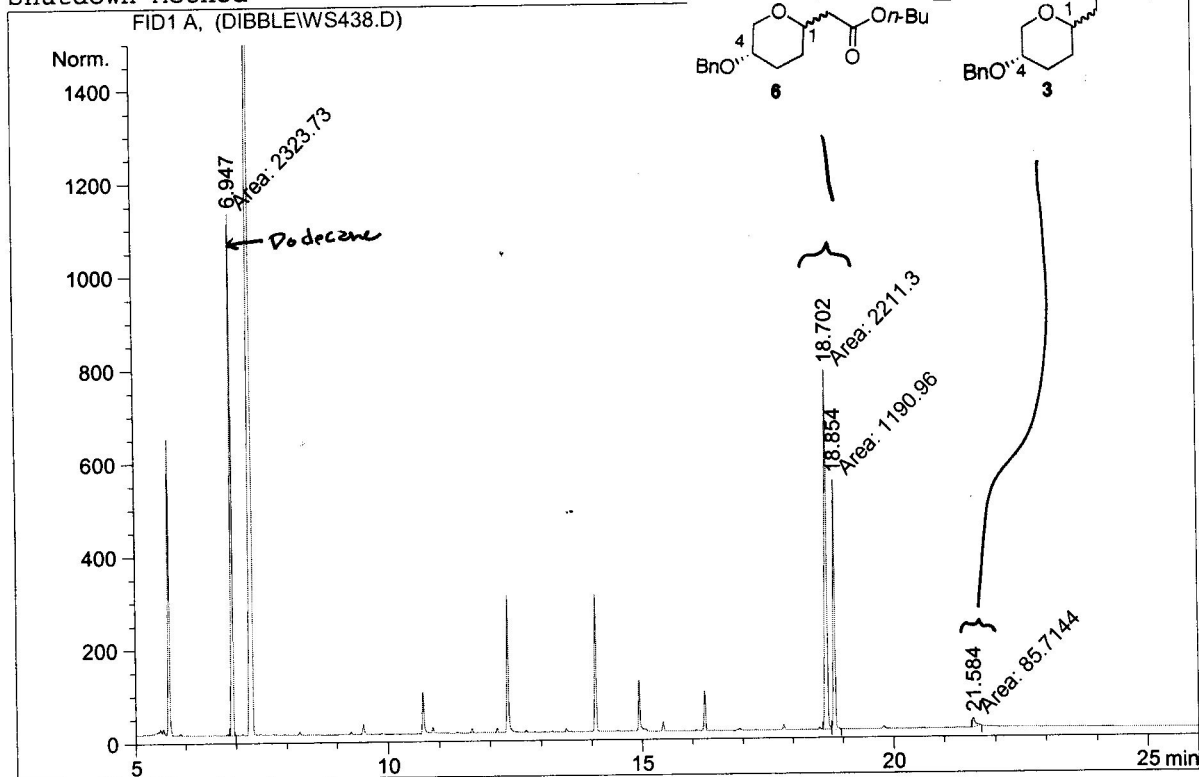

Area Percent Report

```

=====
Sorted By      : Signal
Multiplier    : 1.0000
Dilution      : 1.0000
    
```

Handwritten notes:

$\frac{2323}{1.0} : \frac{3401}{1.1} : \frac{86}{1.25}$

$2323 : 3092 : 69$

Signal 1: FID1 A,

| Peak # | RetTime [min] | Type | Width [min] | Area [pA*s] | Height [pA] | Area %   |
|--------|---------------|------|-------------|-------------|-------------|----------|
| 1      | 6.947         | MM   | 0.0346      | 2323.73486  | 1119.60278  | 39.98368 |
| 2      | 18.702        | MM   | 0.0479      | 2211.30249  | 769.95667   | 38.04910 |
| 3      | 18.854        | MM   | 0.0370      | 1190.95605  | 536.26324   | 20.49236 |
| 4      | 21.584        | MM   | 0.0728      | 85.71442    | 19.61160    | 1.47486  |

prod 6 : prod 3 = 98 : 2

GC yield prod 6 = 67%  
prod 3 = 1%

cis-6 : trans-6  
65 : 35

Totals : 5811.70783 2445.43429

Results obtained with enhanced integrator!

\*\*\* End of Report \*\*\*

```

Injection Date : 1/4/2008 6:25:26 PM           Seq. Line :    3
Sample Name    : WAS-III-193-24                 Location  : Vial 7
Acq. Operator  : jelena                          Inj      :    1
                                                Inj Volume : 1 µl
                                                Actual Inj Volume : 5 µl
Different Inj Volume from Sequence !
Acq. Method   : C:\HPCHEM\1\METHODS\WALTER.M
Last changed  : 11/12/2005 3:11:30 PM by Susan
Analysis Method : C:\HPCHEM\1\METHODS\BEAVER1.M
Last changed  : 5/14/2008 12:38:03 PM by jelena
                (modified after loading)
    
```

### Table 4, Entry 2

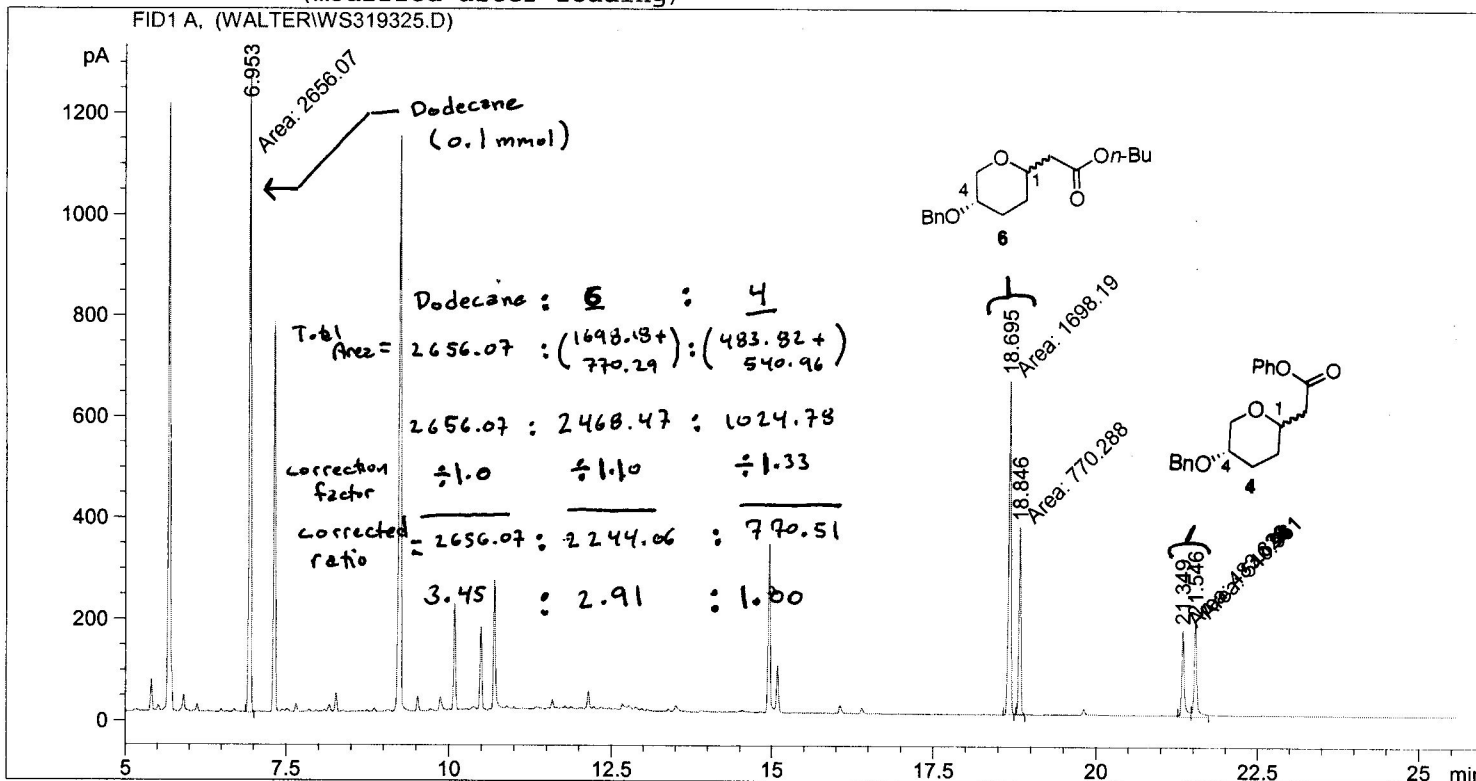

#### Area Percent Report

```

Sorted By : Signal
Multiplier : 1.0000
Dilution : 1.0000
    
```

Dodecane : 5 : 4

corrected ratio 3.45 : 2.91 : 1.00

**Corrected ratio** 5 : 4  
74 : 26

Theor yield was 0.20 mmol  
Based on Dodecane (0.10 mmol added)

Signal 1: FID1 A,

| Peak # | RetTime [min] | Type | Width [min] | Area [pA*s] | Height [pA] | Area %             |
|--------|---------------|------|-------------|-------------|-------------|--------------------|
| 1      | 6.953         | MM   | 0.0352      | 2656.06934  | 1258.35022  | 43.19284           |
| 2      | 18.695        | MM   | 0.0430      | 1698.18530  | 658.24811   | 27.61579 ← cis-5   |
| 3      | 18.846        | MM   | 0.0347      | 770.28845   | 369.60751   | 12.52639 ← trans-5 |
| 4      | 21.349        | MM   | 0.0476      | 483.82300   | 169.45120   | 7.86790 ← cis-4    |
| 5      | 21.546        | MM   | 0.0483      | 540.96106   | 186.53477   | 8.79708 ← trans-4  |

**GC Yield 5 = 42%**  
**GC Yield 4 = 14%**

Totals : 6149.32715 2642.19182

**cis-5 : trans-5 = 69 : 31**  
**cis-4 : trans-4 = 47 : 53**

Results obtained with enhanced integrator!

\*\*\* End of Report \*\*\*

Injection Date : 1/9/2008 6:14:17 PM      Seq. Line : 1  
 Sample Name : WAS-III-195-23              Location : Vial 7  
 Acq. Operator : jelena                      Inj : 1  
                                                  Inj Volume : 1 µl  
 Different Inj Volume from Sequence !      Actual Inj Volume : 5 µl  
 Acq. Method : C:\HPCHEM\1\METHODS\WALTER.M  
 Last changed : 11/12/2005 3:11:30 PM by Susan  
 Analysis Method : C:\HPCHEM\1\METHODS\BEAVER1.M  
 Last changed : 5/14/2008 12:39:43 PM by jelena  
 (modified after loading)

### Table 4, Entry 3

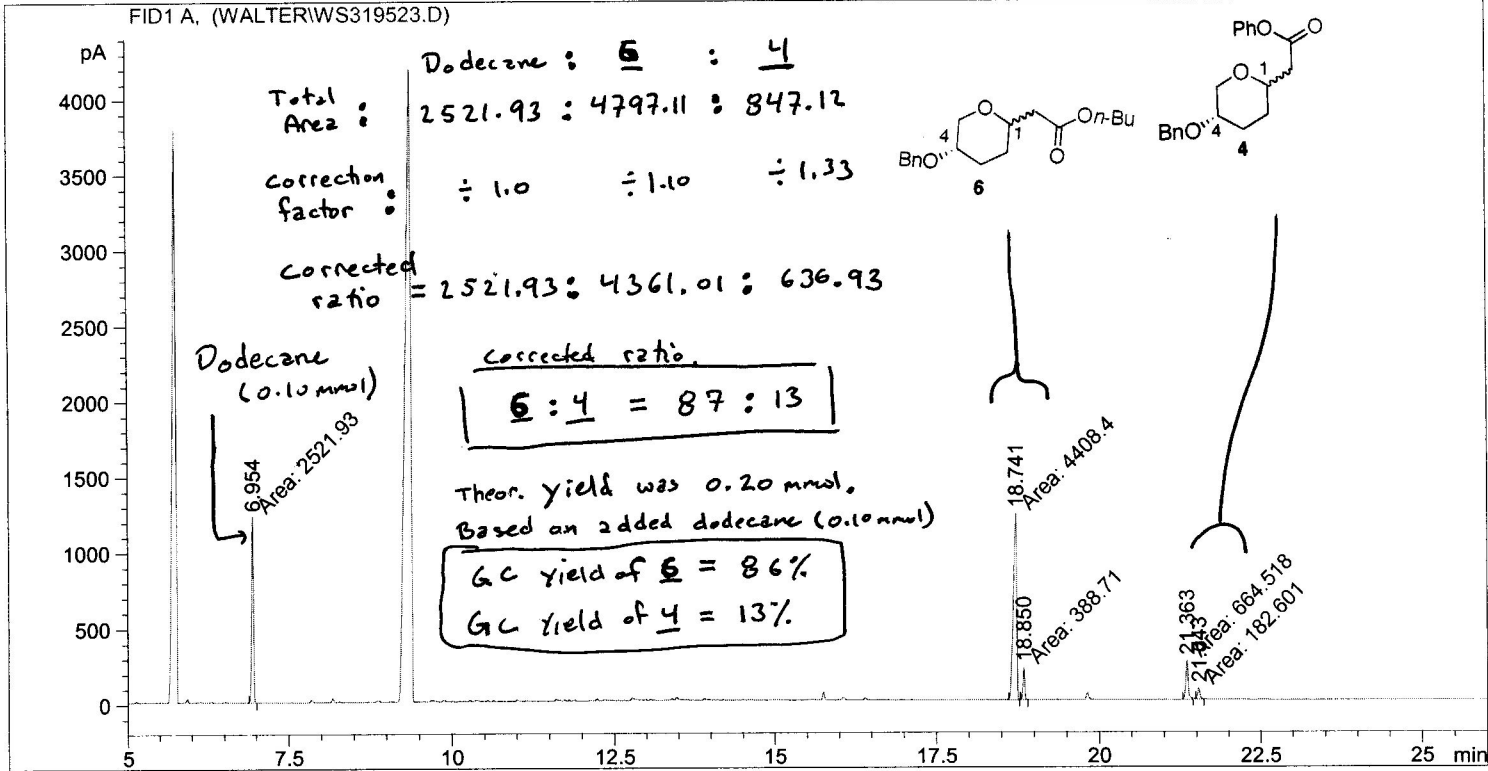

#### Area Percent Report

Sorted By : Signal  
 Multiplier : 1.0000  
 Dilution : 1.0000

Signal 1: FID1 A,

| Peak # | RetTime [min] | Type | Width [min] | Area [pA*s] | Height [pA] | Area %            |
|--------|---------------|------|-------------|-------------|-------------|-------------------|
| 1      | 6.954         | MM   | 0.0344      | 2521.93359  | 1221.22583  | 30.88273          |
| 2      | 18.741        | MM   | 0.0599      | 4408.39844  | 1226.80090  | 53.98373 ← cis-5  |
| 3      | 18.850        | MM   | 0.0307      | 388.71021   | 211.15019   | 4.76001 ← trans-5 |
| 4      | 21.363        | MM   | 0.0431      | 664.51801   | 256.71835   | 8.13746 ← cis-4   |
| 5      | 21.543        | MM   | 0.0413      | 182.60135   | 73.71474    | 2.23607 ← trans-4 |

Totals : 8166.16159 2989.61002

Results obtained with enhanced integrator!

**Handwritten Ratios:**  
 cis-5 : trans-5 = 92 : 8  
 cis-4 : trans-4 = 78 : 22

\*\*\* End of Report \*\*\*

jrk-2-21.a crude GC after workup with dodecane IS

```

=====
Injection Date : 2/1/2008 5:55:12 PM      Seq. Line : 1
Sample Name    : jrk-2-21a                Location  : Vial 21
Acq. Operator  : jelena                    Inj      : 1
                                           Inj Volume: 1 µl
                                           Actual Inj Volume: 5 µl

Different Inj Volume from Sequence !
Acq. Method   : C:\HPCHEM\1\METHODS\KRUMPER.M
Last changed  : 9/5/2007 11:13:31 AM by jelena
Analysis Method : C:\HPCHEM\1\METHODS\SHUTDOWN.M
Last changed  : 5/20/2008 12:24:08 PM by jelena
                (modified after loading)
    
```

eq 1

Shutdown Method

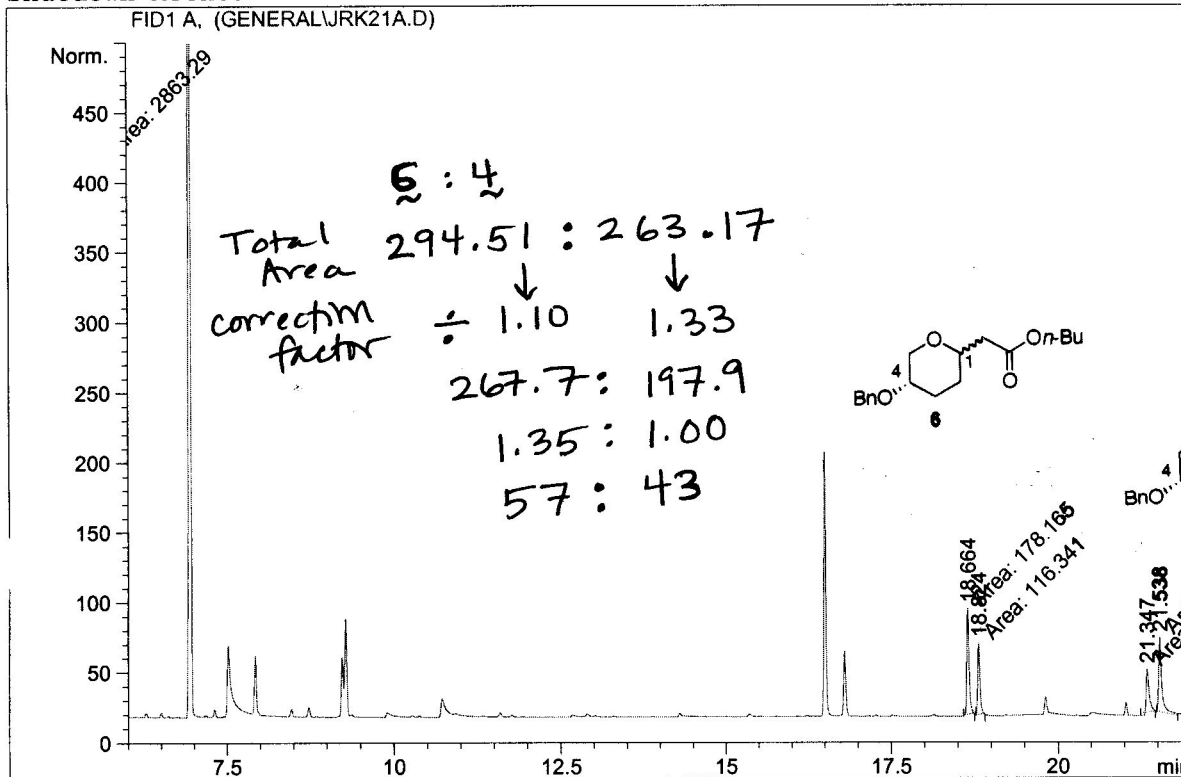

Area Percent Report

```

Sorted By      : Signal
Multiplier    : 1.0000
Dilution      : 1.0000
    
```

Signal 1: FID1 A,

| Peak # | RetTime [min] | Type | Width [min] | Area [pA*s] | Height [pA] | Area %   |
|--------|---------------|------|-------------|-------------|-------------|----------|
| 1      | 5.698         | MM   | 0.0354      | 2863.28760  | 1349.37781  | 83.69802 |
| 2      | 18.664        | MM   | 0.0396      | 178.16505   | 75.03540    | 5.20802  |
| 3      | 18.824        | MM   | 0.0382      | 116.34081   | 50.79527    | 3.40081  |
| 4      | 21.347        | MM   | 0.0500      | 91.66496    | 30.53539    | 2.67950  |
| 5      | 21.538        | MM   | 0.0541      | 171.51556   | 52.82352    | 5.01365  |

Handwritten notes: cis : trans 60 : 40 (for peaks 2 and 3), cis : trans 35 : 65 (for peaks 4 and 5).

Totals : 3420.97398 1558.56738

Results obtained with enhanced integrator!

\*\*\* End of Report \*\*\*
